# Supplementary material
Source: PubMed Central journal article supplement (PMC2631381)

## Supporting Information

# Experimental Entropy ( $\Delta H$ ) and Enthalpy ( $\Delta S$ ) for $\pi$ -Stacking Interactions in near-Sandwich Configurations

Benjamin W. Gung,<sup>\*</sup> Xiaowen Xue, Yan Zou

Department of Chemistry and Biochemistry, Miami University

Oxford, Ohio 45056

[gungbw@muohio.edu](mailto:gungbw@muohio.edu)

### Table of Contents

|                                                                            |     |
|----------------------------------------------------------------------------|-----|
| Experimentals.....                                                         | S2  |
| General Synthetic Procedure for the preparation of compound <b>3</b> ..... | S2  |
| General Synthetic Procedure for the preparation of compound <b>4</b> ..... | S3  |
| General Synthetic Procedure for the preparation of compound <b>5</b> ..... | S5  |
| Preparation of model compounds <b>6-14</b> .....                           | S7  |
| Variable Temperature NMR Experimental Procedure.....                       | S10 |
| References.....                                                            | S10 |
| <sup>1</sup> H NMR spectra of compounds <b>4-12</b> -----                  | S11 |

## Experimentals

All reactions were carried out under an atmosphere of nitrogen in oven-dried glassware. Reagents were purchased from commercial sources and used without further purification. Compounds **3a-3i** were prepared according to the literature procedures.<sup>1,2</sup> Flash column chromatographic separations were performed using silica gel 40–63  $\mu\text{m}$ . Reactions were monitored with TLC and UV light. NMR spectra ( $^1\text{H}$ ,  $^{13}\text{C}$ ) were recorded on Bruker 200 and 300 spectrometers with  $\text{CDCl}_3$  or  $\text{DMSO-d}_6$  as the solvents. Melting points are not corrected.

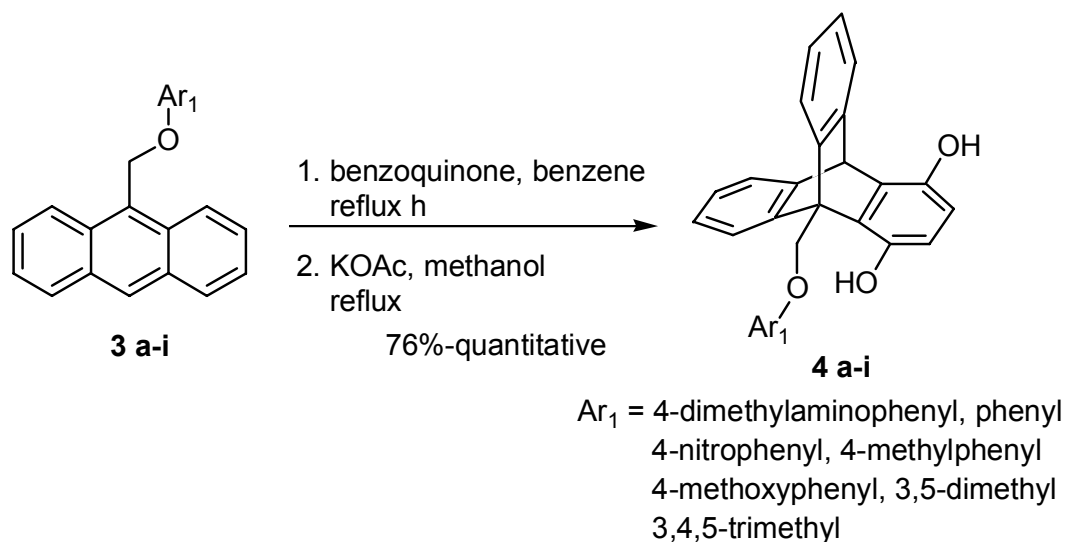

**General Synthetic Procedure for 9-(4-Substituted phenoxy)methyl-1,4-Dihydroxytriptycene (4).**<sup>3,4</sup> The 9-(aryloxymethyl)anthracene (**3**) (0.8 mmol) and p-benzoquinone (0.26 g, 2.4 mmol) in 4 ml of benzene were refluxed under a nitrogen atmosphere for 1-2 days. After cooling, the solvent was removed under reduced pressure and the formed Diels-Alder adduct was used directly for the aromatization without purification.

To the residue from the last step, KOAc (0.10 g, 0.96 mmol) and methanol (10 ml) were added. The mixture was allowed to reflux for 1-2 days. After cooling to room temperature, most methanol was removed under reduced pressure and to the residue water was added. The precipitate was collected by filtration. Further purification via recrystallization or flash column chromatography afforded 9-substituted-1,4-dihydroxytriptycene (**4**) as a solid.

**9-(4-Dimethylaminophenoxy)methyl-1,4-dihydroxytriptycene (4a):** Yield 91%; white solid; m.p. 299-301  $^\circ\text{C}$ ;  $^1\text{H}$  NMR (300 MHz,  $\text{CDCl}_3$ )  $\delta$  8.16 (1H, s), 7.41-7.44 (3H, m), 7.24-7.26 (3H, m), 6.97-7.04 (4H, m), 6.84 (2H, d,  $J = 8.9$  Hz), 6.50 (1H, d,  $J = 8.6$  Hz), 6.42 (1H, d,  $J = 8.6$  Hz), 5.84 (1H, s), 5.41-5.74 (2H, m), 4.44 (1H, s), 2.96 (6H, s);  $^{13}\text{C}$  NMR (75 MHz,  $\text{DMSO}$ )  $\delta$  150.85, 146.05, 145.15, 144.70, 134.39, 130.04, 124.65, 124.38, 123.32, 115.23, 114.84,

114.13, 113.68, 66.80, 54.89, 54.70, 46.49, 41.35; HRMS calcd for  $C_{29}H_{25}NO_3 + Na$  458.1732, found 458.1730.

**9-(Phenoxymethyl)-1,4-dihydroxytriptycene (4b):** Yield 85%; white solid; m.p. 255-257 °C;  $^1H$  NMR (300 MHz,  $CDCl_3$ )  $\delta$  7.70 (1H, s), 7.42-7.50 (5H, m), 7.31-7.34 (3H, m), 7.20-7.24 (1H, m), 6.98-7.05 (4H, m), 6.50 (1H, d,  $J = 8.5$  Hz), 6.43 (1H, d,  $J = 8.5$  Hz), 5.85 (1H, s), 5.52-5.80 (2H, m), 4.41 (1H, s); HRMS calcd for  $C_{27}H_{20}O_3 + Na$  415.1310, found 415.1319.

**9-(4-Nitrophenoxyethyl)-1,4-dihydroxytriptycene (4c):** Yield quantitative; brown solid; m.p. >300 °C;  $^1H$  NMR (300 MHz,  $DMSO-d_6$ )  $\delta$  8.91 (2H, br), 8.35 (2H, d,  $J = 9.1$  Hz), 7.35-7.45 (6H, m), 6.97-7.04 (4H, m), 6.36 (1H, d,  $J = 8.6$  Hz), 6.29 (1H, d,  $J = 8.6$  Hz), 5.83-5.90 (3H, m);  $^{13}C$  NMR (75 MHz,  $CDCl_3$ )  $\delta$  164.02, 149.63, 146.03, 145.53, 145.01, 144.72, 141.10, 134.10, 129.48, 126.15, 124.85, 124.52, 123.91, 123.48, 123.04, 115.32, 114.12, 113.82, 67.40, 53.80, 46.49; HRMS calcd for  $C_{27}H_{19}NO_5 + Na$  460.1161, found 460.1159.

**9-(4-Methylphenoxyethyl)-1,4-dihydroxytriptycene (4d):** Yield 93%;  $^1H$  NMR (200 MHz,  $CDCl_3$ )  $\delta$  7.87 (1H, s), 7.41-7.45 (3H, m), 7.24-7.41 (5H, m), 6.96-7.06 (4H, m), 6.49 (1H, d,  $J = 8.8$  Hz), 6.41 (1H, d,  $J = 8.8$  Hz), 5.49-5.86 (3H, m), 4.64 (1H, s), 2.38 (3H, s); HRMS calcd for  $C_{28}H_{22}O_3 + Na$  429.1467, found 429.1464.

**9-(4-Methoxyphenoxyethyl)-1,4-dihydroxytriptycene (4e):** Yield 92%; brown solid; m.p. >300 °C;  $^1H$  NMR (300 MHz,  $DMSO-d_6$ )  $\delta$  8.83-8.88 (2H, m), 7.37-7.43 (4H, m), 6.98-7.09 (8H, m), 6.34 (1H, d,  $J = 8.6$  Hz), 6.27 (1H, d,  $J = 8.6$  Hz), 5.81 (1H, s), 5.64 (2H, br), 3.73 (3H, s); HRMS calcd for  $C_{28}H_{22}O_4 + Na$  445.1416, found 445.1417.

**9-(3,5-Dimethylphenoxyethyl)-1,4-dihydroxytriptycene (4f):** Yield 94%; brown solid; m.p. 262-264 °C;  $^1H$  NMR (200 MHz,  $CDCl_3$ )  $\delta$  7.84 (1H, s), 7.31-7.45 (4H, m), 6.99-7.03 (4H, m), 6.93 (2H, s), 6.83 (1H, s), 6.49 (1H, d,  $J = 8.6$  Hz), 6.42 (1H, d,  $J = 8.6$  Hz), 5.85 (1H, s), 5.51-5.73 (2H, m), 4.52 (1H, s), 2.39 (6H, s);  $^{13}C$  NMR (75 MHz,  $CDCl_3$ )  $\delta$  156.61, 145.89, 145.37, 144.75, 144.26, 143.59, 140.07, 139.51, 133.74, 130.62, 125.41, 125.17, 124.95, 124.26, 123.81, 122.77, 120.54, 116.93, 114.64, 113.09, 112.38, 67.75, 52.60, 47.13, 21.46; HRMS calcd for  $C_{29}H_{24}O_3 + Na$  443.1623, found 443.1626.

**9-(3,4,5-Trimethylphenoxyethyl)-1,4-dihydroxytriptycene (4g):** Yield 80%; brown solid; m.p. 284-286 °C;  $^1H$  NMR (200 MHz,  $CDCl_3$ )  $\delta$  7.95 (1H, s), 7.30-7.45 (4H, m), 6.98-7.05 (6H, m), 6.49 (1H, d,  $J = 8.6$  Hz), 6.42 (1H, d,  $J = 8.6$  Hz), 5.85 (1H, s), 5.49-5.71 (2H, m), 4.52 (1H, s), 2.35 (6H, s), 2.18 (3H, s);  $^{13}C$  NMR (75 MHz,  $CDCl_3$ )  $\delta$  155.74, 153.91, 145.96, 145.29, 144.78, 144.31, 143.62, 138.40, 137.85, 133.74, 130.60, 130.16, 125.55, 125.38, 124.93, 124.24, 123.80, 122.78, 120.46, 116.89, 114.65, 114.39, 113.94, 113.68, 52.62, 47.12, 20.88, 14.76; HRMS calcd for  $C_{30}H_{26}O_3 + Na$  457.1780, found 457.1783.

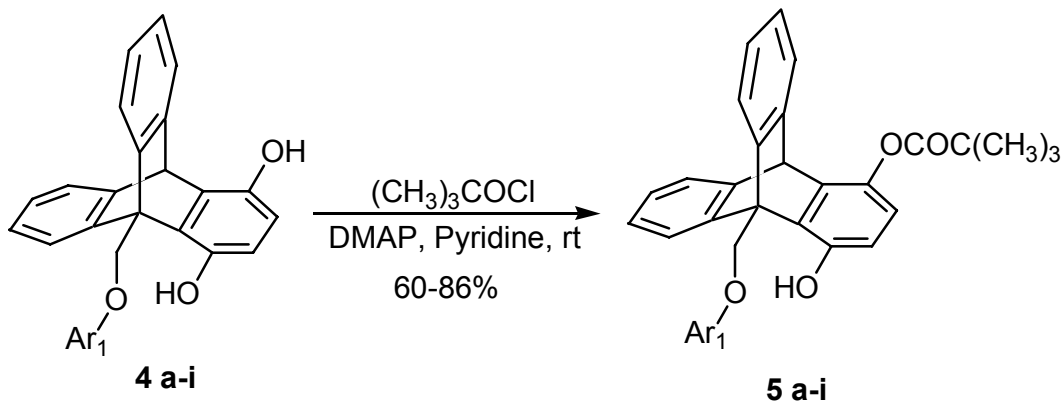

$\text{Ar}_1$  = 4-dimethylaminophenyl, phenyl  
 4-nitrophenyl, 4-methylphenyl  
 4-methoxyphenyl, 3,5-dimethyl  
 3,4,5-trimethyl

**General Synthetic Procedure for 9-(4-Substituted phenoxy)methyl-1-hydroxy-4-pivaloyloxy triptycene (5).**<sup>5</sup> 9-Substituted-1,4-dihydroxytriptycene (**4**) (1.27 mmol) was treated with pivaloyl chloride (0.19 g, 1.53 mmol) and 4-(dimethylamino)pyridine (50 mg, 0.42 mmol) in pyridine (5 ml) at ambient temperature for ~20 h. Then 15 ml of 1N HCl was added to quench the reaction. The mixture was extracted with methylene chloride and the extract was washed with aqueous HCl solution two times and dried over  $\text{MgSO}_4$ . The solvent was removed under reduced pressure and a residue was left. Further purification of the crude via flash column chromatography provided compound **5** as a solid.

**9-(4-Dimethylaminophenoxy)methyl-1-hydroxy-4-pivaloyloxytriptycene (5a):** Yield 64%; brown solid; m.p. 233-235 °C;  $^1\text{H}$  NMR (300 MHz,  $\text{CDCl}_3$ )  $\delta$  8.59 (1H, s), 7.29-7.47 (6H, m), 7.03-7.08 (4H, m), 6.88-6.91 (2H, m), 6.40-6.70 (2H, m), 5.42-5.80 (3H, m), 2.97 (6H, s), 1.56 (9H, s);  $^{13}\text{C}$  NMR (75 MHz,  $\text{CDCl}_3$ )  $\delta$  176.93, 149.32, 148.30, 147.47, 144.91, 144.54, 139.32, 139.08, 130.19, 125.43, 125.13, 123.77, 120.24, 117.19, 116.47, 114.34, 68.68, 52.61, 48.43, 41.23, 39.21, 27.41. HRMS calcd for  $\text{C}_{34}\text{H}_{33}\text{NO}_4 + \text{Na}$  542.2307, found 542.2309.

**9-phenoxy)methyl-1-hydroxy-4-pivaloyloxytriptycene (5b):** Yield 74%; white solid; m.p. 251-253 °C;  $^1\text{H}$  NMR (300 MHz,  $\text{CDCl}_3$ )  $\delta$  8.05 (1H, s), 7.46-7.49 (3H, m), 7.30-7.35 (5H, m), 7.21 (1H, m), 6.97-7.05 (4H, m), 6.68 (1H, d,  $J = 8.4$  Hz), 6.62 (1H, d,  $J = 8.4$  Hz), 5.56-5.77 (2H, m), 5.38 (1H, s), 1.52 (9H, s);  $^{13}\text{C}$  NMR (75 MHz,  $\text{CDCl}_3$ )  $\delta$  176.94, 156.60, 149.20, 144.45, 139.50, 139.15, 130.15, 125.55, 125.21, 123.88, 123.49, 120.37, 117.36, 115.46, 67.86, 52.56, 48.47, 39.28, 27.47; HRMS calcd for  $\text{C}_{32}\text{H}_{28}\text{O}_4 + \text{Na}$  499.1885, found 499.1883.

**9-(4-Nitrophenoxy)methyl-1-hydroxy-4-pivaloyloxytriptycene (5c):** Yield 80%; yellow solid; m.p. 287-289 °C;  $^1\text{H}$  NMR (300 MHz,  $\text{CDCl}_3$ )  $\delta$  8.32 (2H, d,  $J = 8.2$  Hz), 7.32-7.34 (6H, m), 7.01-7.03 (4H, m), 5.84-6.41 (4H, m), 5.35 (1H, s), 5.10 (1H, br), 1.52 (9H, s);  $^{13}\text{C}$  NMR (75 MHz,  $\text{CDCl}_3$ )  $\delta$  177.29, 148.45, 144.68, 144.24, 139.52, 130.56, 126.18, 125.55, 125.25, 123.93, 123.10, 120.02, 115.02, 67.42, 50.86, 48.54, 39.35, 27.47; HRMS calcd for  $\text{C}_{32}\text{H}_{27}\text{NO}_6 + \text{Na}$  544.1736, found 544.1732.

**9-(4-Methylphenoxyethyl)-1-hydroxy-4-pivaloyloxytryptycene (5d):** Yield 83%; white solid; m.p. 239-241 °C; <sup>1</sup>H NMR (300 MHz, CDCl<sub>3</sub>) δ 8.16 (1H, s), 7.26-7.32 (6H, m), 7.20-7.24 (2H, m), 6.97-7.04 (4H, m), 6.67 (1H, d, J = 8.7 Hz), 6.61 (1H, d, J = 8.7 Hz), 5.51-5.74 (2H, m), 5.37 (1H, s), 2.38 (3H, s), 1.51 (9H, s); <sup>13</sup>C NMR (75 MHz, CDCl<sub>3</sub>) δ 176.88, 154.53, 149.28, 144.51, 139.51, 139.12, 133.06, 130.59, 130.21, 125.57, 125.23, 123.92, 122.84, 120.38, 117.36, 115.35, 114.48, 68.06, 53.39, 52.60, 48.48, 39.30, 27.49, 20.63; HRMS calcd for C<sub>33</sub>H<sub>30</sub>O<sub>4</sub> + Na 513.2042, found 513.2043.

**9-(4-Methoxyphenoxyethyl)-1-hydroxy-4-pivaloyloxytryptycene (5e):** Yield 60%; white solid; m.p. 243-245 °C; <sup>1</sup>H NMR (300 MHz, CDCl<sub>3</sub>) δ 8.33 (1H, s), 7.29-7.36 (6H, m), 7.01-7.07 (6H, m), 6.71 (1H, d, J = 8.5 Hz), 6.66 (1H, d, J = 8.5 Hz), 5.48-5.73 (2H, m), 5.40 (1H, s), 3.85 (3H, s), 1.55 (9H, s); <sup>13</sup>C NMR (75 MHz, CDCl<sub>3</sub>) δ 176.94, 155.79, 150.59, 149.27, 144.49, 139.46, 139.13, 130.22, 125.54, 125.20, 123.87, 120.36, 117.30, 116.56, 115.19, 55.75, 52.62, 48.47, 39.28, 27.47; HRMS calcd for C<sub>33</sub>H<sub>30</sub>O<sub>5</sub> + Na 529.1991, found 529.1993.

**9-(3,5-Dimethylphenoxyethyl)-1-hydroxy-4-pivaloyloxytryptycene (5f):** Yield 63%; white solid; m.p. 266-268 °C; <sup>1</sup>H NMR (200 MHz, CDCl<sub>3</sub>) δ 8.16 (1H, s), 7.26-7.33 (4H, m), 6.99-7.04 (4H, m), 6.94 (2H, s), 6.84 (1H, s), 6.67 (1H, d, J = 8.7 Hz), 6.61 (1H, d, J = 8.7 Hz), 5.55-5.71 (2H, m), 5.37 (1H, s), 2.40 (6H, s), 1.51 (9H, s); <sup>13</sup>C NMR (75 MHz, CDCl<sub>3</sub>) δ 176.91, 156.57, 149.28, 144.53, 140.09, 139.47, 139.13, 130.23, 125.53, 125.22, 123.86, 122.70, 120.34, 117.32, 113.94, 113.12, 67.66, 55.15, 52.59, 48.49, 39.28, 27.48, 21.48; HRMS calcd for C<sub>34</sub>H<sub>32</sub>O<sub>4</sub> + Na 527.2198, found 527.2199.

**9-(3,4,5-Trimethylphenoxyethyl)-1-hydroxy-4-pivaloyloxytryptycene (5g):** Yield 85%; white solid; m.p. 285-287 °C; <sup>1</sup>H NMR (200 MHz, CDCl<sub>3</sub>) δ 8.27 (1H, s), 7.28-7.32 (4H, m), 6.99-7.03 (6H, m), 6.67 (1H, d, J = 8.7 Hz), 6.60 (1H, d, J = 8.7 Hz), 5.50-5.70 (2H, m), 5.36 (1H, s), 2.36 (6H, s), 2.19 (3H, s), 1.51 (9H, s); <sup>13</sup>C NMR (75 MHz, CDCl<sub>3</sub>) δ 176.83, 153.89, 149.35, 144.57, 139.47, 139.09, 138.44, 130.26, 125.54, 125.23, 123.89, 120.34, 117.33, 114.44, 67.72, 52.60, 48.47, 39.19, 27.49, 21.03, 20.94; HRMS calcd for C<sub>35</sub>H<sub>34</sub>O<sub>4</sub> + Na 541.2355, found 541.2354.

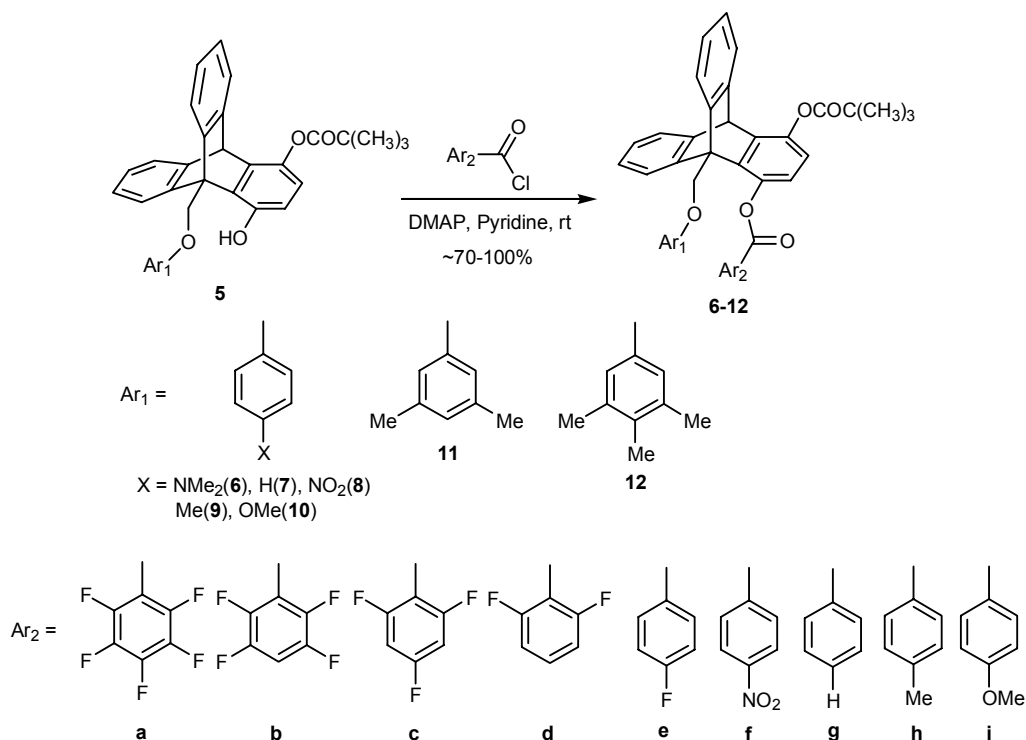

**General Synthetic Procedure for 9-(4-Substituted phenoxy)methyl-1-(substituted benzoyloxy)-4-pivaloyloxytryptene (6-12).**<sup>5,6</sup> 9-(4-Substituted phenoxy)methyl-1-hydroxy-4-pivaloyloxy tryptene (**5**) (0.15 mmol) was treated with corresponding benzoyl chloride (0.19 mmol) and 4-(dimethylamino)pyridine (50 mg, 0.42 mmol) in pyridine (1 ml) at ambient temperature for 0.5-1 d. Then 5 ml of 1N HCl was added to quench the reaction. The mixture was extracted with methylene chloride and the extract was washed with aqueous HCl solution two times and dried over  $\text{MgSO}_4$ . The solvent was removed under reduced pressure and a residue was left. Further purification of the crude via flash column chromatography provided compound **6-12** as a solid.

**9-(4-Dimethylaminophenoxy)methyl-1-pentafluorobenzoyloxy-4-pivaloyloxytryptene (6a):** Yield 77%; yellow solid; m.p. 237-240 °C;  $^1\text{H}$  NMR (300 MHz,  $\text{CDCl}_3$ )  $\delta$  7.47-7.49 (1H, m), 7.29-7.34 (3H, m), 7.04 (4H, m), 6.82-6.89 (4H, m), 6.57 (2H, d,  $J = 8.8$  Hz), 5.56-5.59 (1H, m), 5.43 (1H, s), 5.13-5.16 (1H, m), 2.86 (6H, s), 1.53 (9H, s);  $^{13}\text{C}$  NMR (75 MHz,  $\text{CDCl}_3$ )  $\delta$  176.30, 157.41, 149.97, 147.90, 145.95, 145.65, 144.95, 144.24, 143.63, 142.55, 141.52, 140.74, 139.05, 136.42, 135.65, 125.64, 125.64, 125.54, 124.56, 124.04, 123.55, 121.24, 120.92, 120.11, 114.48, 113.77, 106.74, 65.93, 53.20, 48.48, 41.19, 39.39, 27.42; HRMS calcd for  $\text{C}_{41}\text{H}_{32}\text{F}_5\text{NO}_5 + \text{H}$  714.2279, found 714.2297.

**9-(4-Dimethylaminophenoxy)methyl-1-(2,3,5,6-tetrafluorobenzoyloxy)-4-pivaloyloxytryptene (6b):** Yield quantitative; yellow solid;  $^1\text{H}$  NMR (300 MHz,  $\text{CDCl}_3$ )  $\delta$  7.33-7.50 (4H, m), 7.04 (5H, m), 6.83-6.90 (4H, m), 6.60 (2H, br), 5.19-5.61 (3H, m), 2.87 (6H, s), 1.54 (9H, s);  $^{13}\text{C}$  NMR (75 MHz,  $\text{CDCl}_3$ )  $\delta$  176.27, 157.95, 157.91, 157.87, 150.21, 147.46, 146.96, 145.59, 144.23, 143.59, 142.61, 140.66, 136.42, 125.59, 125.48, 124.54, 123.97, 123.54,

121.20, 120.91, 120.10, 114.36, 109.58, 109.27, 108.99, 65.87, 53.16, 48.46, 41.50, 39.36, 27.40; HRMS calcd for C<sub>41</sub>H<sub>33</sub>F<sub>4</sub>NO<sub>5</sub> + H 696.2373, found 696.2371.

**9-(4-Dimethylaminophenoxyethyl)-1-(2,4,6-trifluorobenzoyloxy)-4-pivaloyloxytriptycene (6c):** Yield 71%; brown solid; m.p. 203-204°C; <sup>1</sup>H NMR (300 MHz, CDCl<sub>3</sub>) δ 7.31-7.45 (4H, m), 7.03 (5H, m), 6.59-6.89 (6H, m), 6.41 (1H, br), 5.12-5.62 (3H, m), 2.85 (6H, s), 1.53 (9H, s); HRMS calcd for C<sub>41</sub>H<sub>34</sub>F<sub>3</sub>NO<sub>5</sub> + H 678.2467, found 678.2460.

**9-(4-Dimethylaminophenoxyethyl)-1-(2,6-difluorobenzoyloxy)-4-pivaloyloxytriptycene (6d):** Yield 73%; <sup>1</sup>H NMR (300 MHz, CDCl<sub>3</sub>) δ 7.33-7.66 (5H, m), 6.43-7.16 (12H, m), 5.16-5.69 (3H, m), 2.86 (6H, s), 1.54 (9H, s); HRMS calcd for C<sub>41</sub>H<sub>35</sub>F<sub>2</sub>NO<sub>5</sub> + Na 682.2381, found 682.2380.

**9-(4-Dimethylaminophenoxyethyl)-1-(4-fluorobenzoyloxy)-4-pivaloyloxytriptycene (6e):** Yield 96%; white solid; m.p. 249-251°C; <sup>1</sup>H NMR (300 MHz, CDCl<sub>3</sub>) δ 7.78-8.36 (2H, m), 7.31-7.42 (5H, m), 6.73-7.03 (7H, m), 6.50-6.52 (4H, m), 5.08-5.62 (3H, m), 2.83 (6H, s), 1.53 (9H, m); <sup>13</sup>C NMR (75 MHz, CDCl<sub>3</sub>) δ 176.35, 164.05, 162.23, 144.34, 143.44, 133.24, 125.72, 125.65, 125.41, 124.56, 123.89, 121.23, 120.34, 116.48, 115.18, 66.30, 55.0, 48.50, 39.39, 32.62, 27.43. HRMS calcd for C<sub>41</sub>H<sub>36</sub>FNO<sub>5</sub> + H, 642.2656, found 642.2642

**9-(4-Dimethylaminophenoxyethyl)-1-benzoyloxy-4-pivaloyloxytriptycene (6g):** Yield 64%; brown solid; <sup>1</sup>H NMR (300 MHz, CDCl<sub>3</sub>) δ 7.58-8.35 (4H, m), 7.31-7.42 (5H, m), 7.00-7.05 (4H, m), 6.82 (1H, d, J = 8.8 Hz), 6.76 (1H, d, J = 8.8 Hz), 6.51-6.55 (4H, m), 5.45 (3H, m), 2.83 (6H, s), 1.53 (9H, s); <sup>13</sup>C NMR (75 MHz, CDCl<sub>3</sub>) δ 176.27, 165.03, 150.71, 145.74, 144.37, 143.88, 143.32, 142.71, 141.42, 137.48, 133.98, 130.53, 129.30, 128.97, 125.45, 125.34, 124.08, 123.68, 121.25, 120.09, 114.90, 66.09, 55.18, 48.49, 41.78, 39.34, 27.39; ; HRMS calcd for C<sub>41</sub>H<sub>37</sub>NO<sub>5</sub> + H 624.2750, found 624.2762.

**9-Phenoxyethyl-1-(pentafluorobenzoyloxy)-4-pivaloyloxytriptycene (7a):** Yield 77%; light yellow solid; m.p. 240-242°C; <sup>1</sup>H NMR (300 MHz, CDCl<sub>3</sub>) δ 7.26-7.43 (5H, m), 7.21-7.24 (1H, m), 7.07 (4H, m), 6.86-6.97 (5H, m), 5.27-5.67 (3H, m), 1.56 (9H, s); <sup>13</sup>C NMR (75 MHz, CDCl<sub>3</sub>) δ 176.31, 157.99, 157.29, 147.83, 145.92, 145.15, 144.24, 144.07, 143.67, 142.49, 141.81, 140.73, 139.12, 136.19, 135.75, 129.34, 125.74, 125.54, 124.29, 124.12, 123.69, 121.18, 120.22, 114.02, 106.69, 65.88, 53.06, 48.49, 39.41, 29.69, 27.44; HRMS calcd for C<sub>39</sub>H<sub>27</sub>F<sub>5</sub>O<sub>5</sub> + Na 693.1676, found 693.1686.

**9-Phenoxyethyl-1-(4-fluorobenzoyloxy)-4-pivaloyloxytriptycene (7e):** Yield 78%; light yellow solid; m.p. 203-205°C; <sup>1</sup>H NMR (300 MHz, CDCl<sub>3</sub>) δ 7.78-8.40 (2H, m), 7.34-7.36 (5H, m), 7.03-7.11 (9H, m), 6.75-6.86 (4H, m), 6.63 (1H, m), 5.18-5.68 (3H, m), 1.54 (9H, s); <sup>13</sup>C NMR (75 MHz, CDCl<sub>3</sub>) δ 176.31, 164.06, 158.16, 144.30, 143.70, 143.41, 142.55, 141.41, 137.31, 133.20, 132.47, 129.31, 125.57, 125.39, 123.80, 121.07, 120.22, 116.06, 115.19, 114.30, 65.80, 55.01, 48.49, 39.35, 27.39; HRMS calcd for C<sub>39</sub>H<sub>31</sub>FO<sub>5</sub> + Na 621.2053, found 621.2046.

**9-Phenoxyethyl-1-(4-nitrobenzoyloxy)-4-pivaloyloxytriptycene (7f):** Yield 71%; white solid; m.p. 253-255°C; <sup>1</sup>H NMR (300 MHz, CDCl<sub>3</sub>) δ 8.51 (1H, br), 7.93 (3H, m), 7.34-7.36 (4H, m), 7.01-7.05 (6H, m), 6.75-6.89 (5H, m), 5.17-5.66 (3H, m), 1.55 (9H, s); <sup>13</sup>C NMR (75

MHz, CDCl<sub>3</sub>) δ 176.30, 163.10, 157.86, 150.07, 146.04, 144.16, 143.58, 143.27, 140.48, 136.44, 134.67, 130.73, 129.29, 125.66, 125.43, 124.13, 123.66, 123.01, 121.43, 121.12, 120.69, 120.31, 114.20, 65.85, 53.22, 48.46, 39.36, 27.38; HRMS calcd for C<sub>39</sub>H<sub>31</sub>NO<sub>7</sub> + Na 648.1998, found 648.2018.

**9-Phenoxymethyl-1-benzoyloxy-4-pivaloyloxytriptycene (7g):** Yield quantitative; white solid; m.p. 205-207°C; <sup>1</sup>H NMR (300 MHz, CDCl<sub>3</sub>) δ 8.39 (1H, br), 7.70-7.84 (3H, m), 7.36-7.43 (4H, m), 7.04-7.06 (7H, m), 6.62-6.91 (5H, m), 5.21-5.74 (3H, m), 1.56 (9H, s); <sup>13</sup>C NMR (75 MHz, CDCl<sub>3</sub>) δ 176.33, 165.07, 158.26, 144.41, 143.79, 143.42, 142.71, 141.46, 137.39, 134.20, 130.59, 129.37, 129.30, 129.06, 125.58, 125.41, 123.80, 121.31, 120.96, 120.23, 114.42, 65.86, 55.12, 48.55, 39.40, 27.45; HRMS calcd for C<sub>39</sub>H<sub>32</sub>O<sub>5</sub> + Na 603.2147, found 603.2141.

**9-Phenoxymethyl-1-(4-methylbenzoyloxy)-4-pivaloyloxytriptycene (7h):** Yield 78%; white solid; m.p. 221-223°C; <sup>1</sup>H NMR (300 MHz, CDCl<sub>3</sub>) δ 7.33-8.27 (8H, m), 7.02-7.06 (6H, m), 6.75-6.91 (3H, m), 6.61 (2H, m), 5.18-5.69 (3H, m), 2.32-2.59 (3H, m), 1.53 (9H, s); <sup>13</sup>C NMR (75 MHz, CDCl<sub>3</sub>) δ 176.29, 165.11, 158.27, 145.16, 144.41, 143.81, 143.33, 142.74, 141.36, 137.36, 130.63, 129.69, 129.26, 126.51, 125.52, 125.36, 123.92, 123.76, 121.36, 120.91, 120.15, 114.45, 65.86, 55.06, 48.52, 39.35, 27.42, 21.79; HRMS calcd for C<sub>40</sub>H<sub>34</sub>O<sub>5</sub> + Na 617.2304, found 617.2309.

**9-Phenoxymethyl-1-(4-methoxybenzoyloxy)-4-pivaloyloxytriptycene (7i):** Yield 89%; white solid; m.p. 213-214°C; <sup>1</sup>H NMR (300 MHz, CDCl<sub>3</sub>) δ 7.76-8.35 (2H, m), 7.35-7.42 (4H, m), 7.04-7.15 (8H, m), 6.76-6.93 (3H, m), 6.67 (2H, m), 5.47-5.53 (3H, m), 3.81-3.99 (3H, m), 1.55 (9H, s); <sup>13</sup>C NMR (75 MHz, CDCl<sub>3</sub>) δ 176.32, 164.78, 164.44, 158.31, 144.43, 143.85, 143.30, 142.82, 141.28, 137.41, 132.78, 129.32, 125.53, 125.37, 123.92, 123.76, 121.52, 120.95, 120.14, 114.48, 114.26, 65.87, 55.66, 55.04, 48.53, 39.37, 27.43; HRMS calcd for C<sub>40</sub>H<sub>34</sub>O<sub>6</sub> + Na 633.2253, found 633.2233.

**9-(4-Nitrophenoxymethyl)-1-pentafluorobenzoyloxy-4-pivaloyloxytriptycene (8a):** Yield 26%; white solid; m.p. 253-255°C; <sup>1</sup>H NMR (200 MHz, CDCl<sub>3</sub>) δ 8.16 (2H, d, J = 9.1 Hz), 7.28-7.35 (4H, m), 7.04-7.07 (6H, m), 6.87(2H, m), 5.71 (1H, m), 5.39-5.46 (2H, m), 1.54 (9H, s); <sup>13</sup>C NMR (75 MHz, CDCl<sub>3</sub>) δ 176.31, 162.77, 157.16, 147.71, 145.69, 144.19, 143.85, 143.41, 142.42, 142.05, 140.75, 139.21, 135.72, 126.03, 125.62, 124.06, 123.57, 121.01, 120.63, 114.42, 67.09, 52.95, 48.46, 39.44, 27.43; HRMS calcd for C<sub>39</sub>H<sub>26</sub>F<sub>5</sub>NO<sub>7</sub> + Na 738.1527, found 738.1525.

**9-(4-Nitrophenoxymethyl)-1-(4-fluorobenzoyloxy)-4-pivaloyloxytriptycene (8e):** Yield 86%; yellow solid; m.p. 298-299°C; <sup>1</sup>H NMR (300 MHz, CDCl<sub>3</sub>) δ 8.40 (1H, br), 8.00 (2H, d, J = 9.2 Hz), 7.78 (1H, br), 7.27-7.38 (4H, m), 7.04-7.24 (5H, m), 6.75-6.87 (4H, m), 6.66 (1H, m), 5.33-5.78 (3H, m), 1.52 (9H, s); <sup>13</sup>C NMR (75 MHz, CDCl<sub>3</sub>) δ 176.34, 163.92, 162.96, 144.29, 143.52, 142.41, 141.86, 133.13, 132.44, 125.86, 125.70, 125.45, 124.08, 123.39, 121.46, 120.50, 116.24, 115.40, 114.43, 66.92, 52.97, 48.48, 39.39, 27.41; HRMS calcd for C<sub>39</sub>H<sub>30</sub>FNO<sub>7</sub> + Na 666.1904, found 666.1882.

**9-(4-Nitrophenoxymethyl)-1-(4-nitrobenzoyloxy)-4-pivaloyloxytriptycene (8f):** Yield 55%; yellow solid; m.p. >307°C; <sup>1</sup>H NMR (300 MHz, CDCl<sub>3</sub>) δ 7.95-8.51 (6H, m), 7.18-7.37 (4H, m),



7.05-7.10 (4H, m), 6.77-6.90 (4H, m), 5.33-5.77 (3H, m), 1.55 (9H, s); HRMS calcd for  $C_{39}H_{30}N_2O_9 + Na$  693.1849, found 693.1873.

**9-(4-Nitrophenoxyethyl)-1-benzoyloxy-4-pivaloyloxytryptycene (8g):** Yield 75%; white solid; m.p. 295-296°C;  $^1H$  NMR (300 MHz,  $CDCl_3$ )  $\delta$  8.39 (1H, br), 7.73-7.94 (5H, m), 7.27-7.38 (4H, m), 7.04-7.24 (5H, m), 6.48-6.89 (4H, m), 5.30-5.83 (3H, m), 1.53 (9H, s);  $^{13}C$  NMR (75 MHz,  $CDCl_3$ )  $\delta$  176.34, 164.90, 162.99, 144.33, 143.48, 141.78, 134.60, 130.48, 129.13, 128.21, 125.84, 125.44, 124.03, 123.37, 121.43, 120.46, 114.48, 66.99, 54.66, 48.50, 39.40, 27.43; HRMS calcd for  $C_{39}H_{31}NO_7 + Na$  648.1998, found 648.1976.

**9-(4-Nitrophenoxyethyl)-1-(4-methylbenzoyloxy)-4-pivaloyloxytryptycene (8h):** Yield 92%; white solid; m.p. 296-298°C;  $^1H$  NMR (300 MHz,  $CDCl_3$ )  $\delta$  8.26 (1H, br), 7.93 (2H, d,  $J = 9.2$  Hz), 7.27-7.53 (6H, m), 7.04-7.09 (5H, m), 6.63-6.86 (4H, m), 5.31-5.83 (3H, m), 2.30-2.64 (3H, m), 1.54 (9H, s);  $^{13}C$  NMR (75 MHz,  $CDCl_3$ )  $\delta$  176.33, 164.91, 163.08, 145.67, 144.36, 143.42, 141.72, 130.52, 129.88, 128.92, 126.39, 125.81, 125.65, 125.42, 124.04, 123.42, 121.52, 120.41, 114.52, 67.01, 54.67, 48.50, 39.38, 27.42, 21.81; HRMS calcd for  $C_{40}H_{33}NO_7 + Na$  662.2155, found 662.2139.

**9-(4-Nitrophenoxyethyl)-1-(4-methoxybenzoyloxy)-4-pivaloyloxytryptycene (8i):** Yield 60%; white solid; m.p. 295-296°C;  $^1H$  NMR (300 MHz,  $CDCl_3$ )  $\delta$  8.32 (1H, br), 7.96 (2H, d,  $J = 9.0$  Hz), 7.68 (1H, br), 7.27-7.37 (4H, m), 7.04-7.17 (5H, m), 6.66-6.85 (5H, m), 5.30-5.82 (3H, m), 3.76-4.03 (3H, m), 1.53 (9H, s);  $^{13}C$  NMR (75 MHz,  $CDCl_3$ )  $\delta$  176.32, 164.53, 163.11, 144.35, 143.35, 142.72, 141.02, 136.83, 132.65, 125.78, 125.69, 125.39, 124.00, 123.35, 121.59, 121.29, 120.36, 114.52, 113.48, 67.00, 55.67, 54.70, 48.48, 39.36, 27.40; HRMS calcd for  $C_{40}H_{33}NO_8 + Na$  678.2104, found 678.2086.

**9-(4-Methylphenoxyethyl)-1-pentafluorobenzoyloxy-4-pivaloyloxytryptycene (9a):** Yield 88%; white solid; m.p. 259-260°C;  $^1H$  NMR (300 MHz,  $CDCl_3$ )  $\delta$  7.32-7.43 (4H, m), 6.98-7.04 (6H, m), 6.79-6.90 (4H, m), 5.19-5.58 (3H, m), 2.26 (3H, s), 1.53 (9H, s);  $^{13}C$  NMR (75 MHz,  $CDCl_3$ )  $\delta$  176.30, 157.28, 155.88, 147.82, 145.91, 144.13, 143.65, 142.50, 140.738, 136.23, 135.79, 130.70, 129.64, 125.71, 125.53, 124.39, 124.10, 123.64, 121.16, 120.91, 120.17, 113.79, 65.85, 53.13, 48.48, 39.41, 27.44, 20.12; HRMS calcd for  $C_{40}H_{29}F_5O_5 + Na$  707.1833, found 707.1848.

**9-(4-Methoxyphenoxyethyl)-1-pentafluorobenzoyloxy-4-pivaloyloxytryptycene (10a):** Yield 89%; white solid; m.p. 240-241°C;  $^1H$  NMR (300 MHz,  $CDCl_3$ )  $\delta$  7.32-7.44 (4H, m), 7.04 (4H, m), 6.84-6.89 (4H, m), 6.73 (2H, d,  $J = 8.9$  Hz), 5.17-5.57 (3H, m), 3.76 (3H, s), 1.53 (9H, s);  $^{13}C$  NMR (75 MHz,  $CDCl_3$ )  $\delta$  176.31, 157.34, 154.17, 152.09, 147.87, 145.87, 144.12, 143.68, 142.52, 140.73, 139.12, 136.30, 135.75, 125.72, 125.54, 124.37, 124.10, 123.66, 121.18, 120.84, 120.21, 114.67, 114.31, 106.82, 66.19, 55.59, 53.15, 48.48, 39.41, 27.44; HRMS calcd for  $C_{40}H_{29}F_5O_6 + Na$  723.1782, found 723.1771.

**9-(3,5-Dimethylphenoxyethyl)-1-pentafluorobenzoyloxy-4-pivaloyloxytryptycene (11a):** Yield 89%; white solid; m.p. 246-248°C;  $^1H$  NMR (300 MHz,  $CDCl_3$ )  $\delta$  7.32-7.43 (4H, m), 7.01-7.05 (4H, m), 6.90 (1H, d,  $J = 8.8$  Hz), 6.84 (1H, d,  $J = 8.8$  Hz), 6.52 (3H, m), 5.60-5.62 (1H, m), 5.43 (1H, s), 5.14-5.17 (1H, m), 2.25 (6H, s), 1.53 (9H, s);  $^{13}C$  NMR (75 MHz,  $CDCl_3$ )

$\delta$  176.33, 158.03, 157.23, 148.06, 145.94, 144.18, 143.61, 142.50, 140.73, 139.52, 136.18, 125.70, 125.57, 124.42, 124.09, 123.62, 122.74, 121.20, 120.13, 111.64, 106.77, 65.63, 53.10, 48.49, 39.43, 27.46, 21.10; HRMS calcd for  $C_{41}H_{31}F_5O_5 + Na$  721.1989, found 721.2000.

**9-(3,4,5-Trimethylphenoxyethyl)-1-pentafluorobenzoyloxy-4-pivaloyloxytriptycene (12a):**

Yield 91%; white solid; m.p. 243-245°C;  $^1H$  NMR (300 MHz,  $CDCl_3$ )  $\delta$  7.32-7.45 (4H, m), 6.98-7.05 (4H, m), 6.90 (1H, d,  $J = 8.9$  Hz), 6.84 (1H, d,  $J = 8.9$  Hz), 6.56 (2H, s), 5.57-5.60 (1H, m), 5.43 (1H, s), 5.12-5.15 (1H, m), 2.22 (6H, s), 2.07 (3H, s), 1.53 (9H, s);  $^{13}C$  NMR (75 MHz,  $CDCl_3$ )  $\delta$  176.32, 157.20, 155.35, 147.85, 145.95, 145.17, 144.23, 143.60, 142.51, 140.72, 139.21, 137.71, 136.24, 135.89, 127.71, 125.67, 125.57, 125.47, 124.521, 124.08, 123.57, 121.20, 120.96, 120.08, 112.90, 106.93, 106.78, 65.45, 53.12, 48.49, 39.41, 27.45, 20.75, 20.45; HRMS calcd for  $C_{42}H_{33}F_5O_5 + Na$  735.2146, found 735.2137.

### Variable Temperature NMR Experimental Procedure

The  $^1H$  NMR spectra were recorded on a Bruker 300 MHz instrument with a variable temperature probe. A 0.05 M solution of the sample in a deuterated solvent such as chloroform was placed in a high quality NMR tube. All samples were degassed using a needle to bubble nitrogen through the sample for ~1 minute. The NMR tube was then capped with a cap and sealed with parafilm. The sample tube was placed into the NMR probe and the air line to the probe was replaced with liquid nitrogen transfer line. The desired temperature was set on the variable temperature unit and the sample was allowed to equilibrate for 10 ~ 15 minutes at each set temperature. Then the  $^1H$  NMR spectrum at each temperature was recorded. The ratios of rotamers were obtained through the integrations of selected peaks.

### References

- (1) Tamura, Y.; Yamamoto, G.; Oki, M. *Bull. Chem. Soc. Jpn.* **1987**, *60*, 1781-8. "CH<sub>3</sub>-O hydrogen bond. Implications of its presence from the substituent effects on the populations of rotamers in 4-substituted 9-ethyl-1-methoxytriptycenes and 9-(substituted phenoxyethyl)-1,4-dimethyltriptycenes"
- (2) Kimura, N. *J. Am. Chem. Soc.* **2001**, *123*, 3824-3825. "The Role of the Leaving Group in the Dissociation of Radical Anions of 9-(Aryloxyethyl)anthracenes"
- (3) Oki, M.; Izumi, G.; Yamamoto, G.; Nakamura, N. *Bull. Chem. Soc. Jpn.* **1982**, *55*, 159-66. "Attractive interactions between carbonyls and groups bearing lone-pair electrons in triptycene systems"
- (4) Smith, J. G.; Dibble, P. W.; Sandborn, R. E. *Journal of Organic Chemistry* **1986**, *51*, 3762-3768. "The Preparation and Reactions of Naphtho 1,2-C Furan and Naphtho 2,3-C Furan"
- (5) Cunningham, B. D. M.; Lowe, P. R.; Threadgill, M. D. *Journal of the Chemical Society-Perkin Transactions 2* **1989**, 1275-1283. "Structural Studies on Bio-Active Compounds .12. Tautomerism and Conformation of Aryl-Substituted 1-(2-Hydroxyphenyl)-3- Phenylpropane-1,3-Diones in the Solid-Phase and in Solution"
- (6) Gung Benjamin, W.; Xue, X.; Reich Hans, J. *J. Org. Chem.* **2005**, *70*, 3641-4. "The strength of parallel-displaced arene-arene interactions in chloroform"



Current Data Parameters

NAME nmphenolazom  
 EXPNO 3  
 PROCNO 1

F2 - Acquisition Parameters

Date\_ 20051004  
 Time 11.34  
 INSTRUM spect  
 PROBHD 5 mm Multinu  
 PULPROG zg30  
 TD 32768  
 SOLVENT CDCl3  
 NS 128  
 DS 2  
 SWH 6188.119 Hz  
 FIDRES 0.188846 Hz  
 AQ 2.6477044 sec  
 RG 2896.3  
 DW 80.800 usec  
 DE 6.00 usec  
 TE 300.0 K  
 D1 1.0000000 sec  
 F1 6.40 usec  
 SFO1 300.1318534 MHz  
 NUC1 1H  
 PL1 4.00 dB

F2 - Processing parameters

SI 16384  
 SF 300.1300121 MHz  
 WDW EM  
 SSB 0  
 LB 0.30 Hz  
 GB 0  
 PC 1.00

1D NMR plot parameters

CX 20.00 cm  
 F1P 9.000 ppm  
 F1 2701.17 Hz  
 F2P 2.000 ppm  
 F2 600.26 Hz  
 PPMCM 0.35000 ppm/cm  
 HZCM 105.04550 Hz/cm

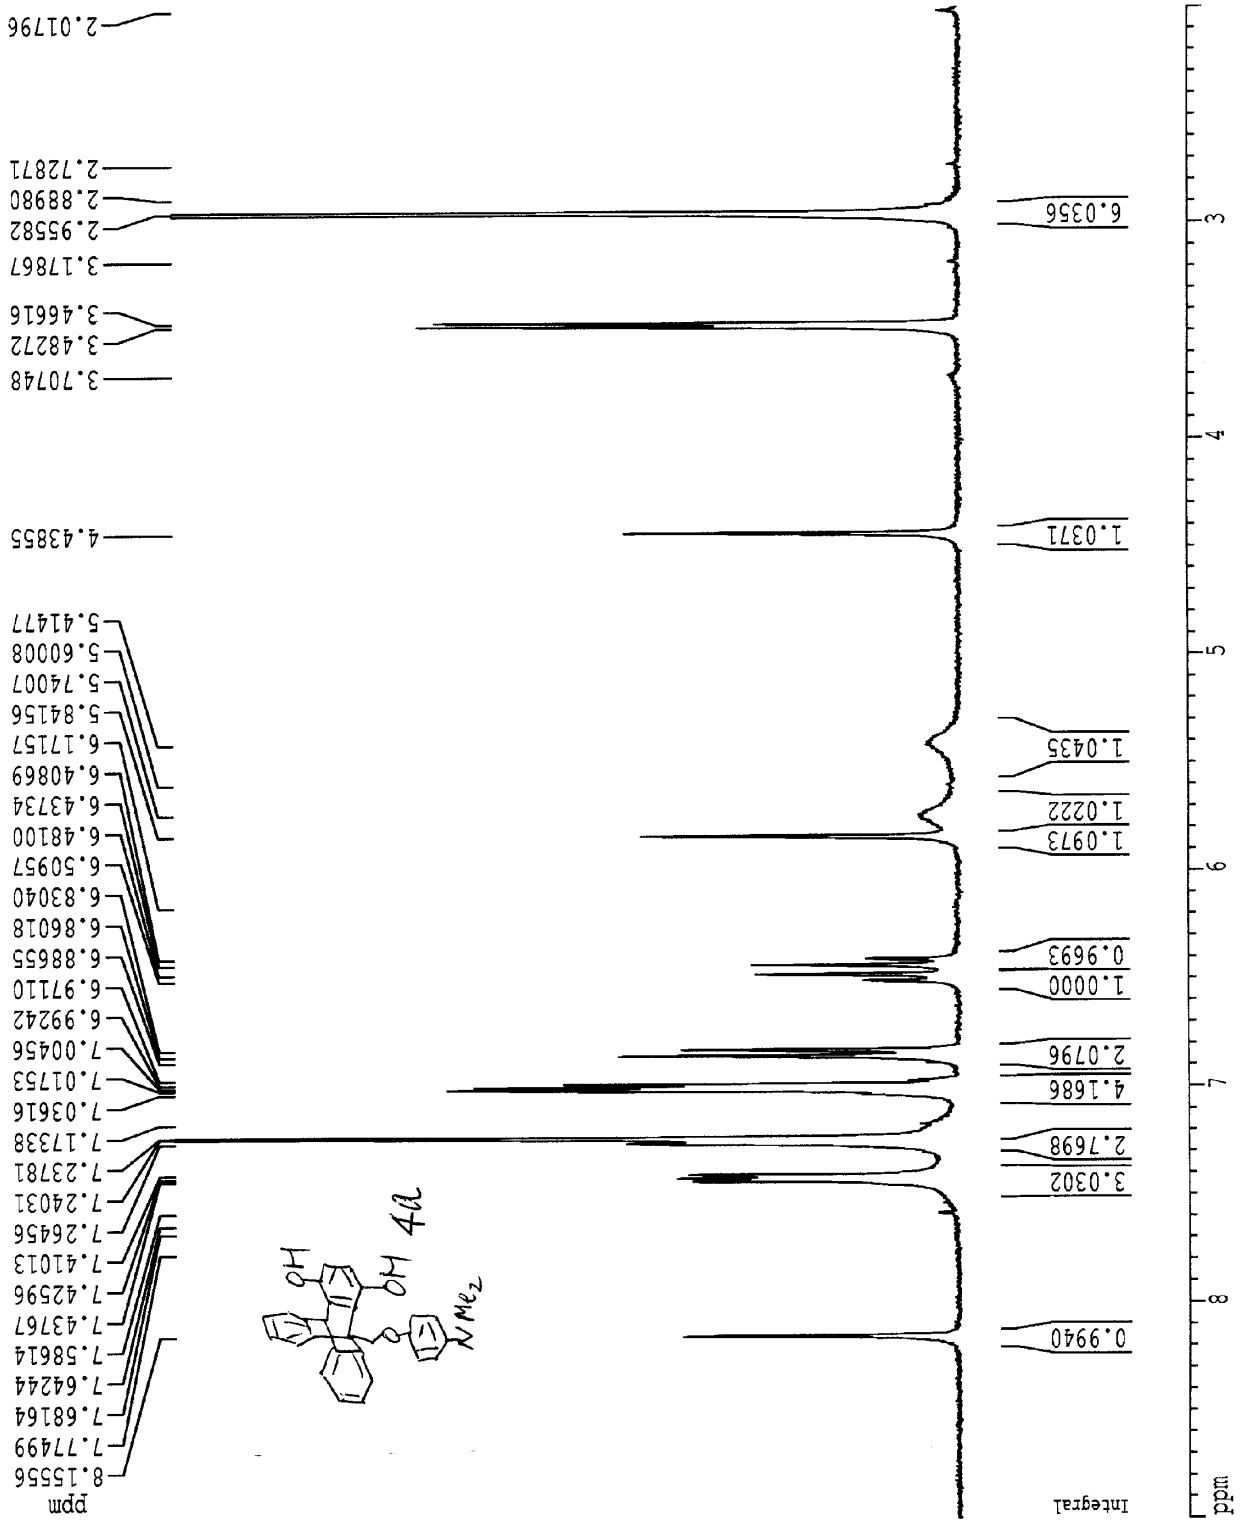

Current Data Parameters  
NAME hphenodiphenol  
EXPNO 1  
PROCNO 1

F2 - Acquisition Parameters  
Date\_ 20060523  
Time 15.19  
INSTRUM spect  
PROBHD 5 mm Multinu  
PULPROG zg30  
TD 32768  
SOLVENT CDCl3  
NS 64  
DS 2  
SWH 6188.119 Hz  
FIDRES 0.188846 Hz  
AQ 2.6477044 sec  
RG 1149.4  
DW 80.800 usec  
DE 6.00 usec  
TE 300.0 K  
D1 1.0000000 sec  
F1 14.10 usec  
SF01 300.1318534 MHz  
NUC1 1H  
PL1 3.00 dB

F2 - Processing parameters  
SI 16384  
SF 300.1300121 MHz  
WDW EM  
SSB 0  
LB 0.30 Hz  
GB 0  
PC 1.00

1D NMR plot parameters  
CX 20.00 cm  
F1P 11.000 ppm  
F1 3301.43 Hz  
F2P -1.000 ppm  
F2 -300.13 Hz  
PPMCM 0.60000 ppm/cm  
HZCM 180.07800 Hz/cm

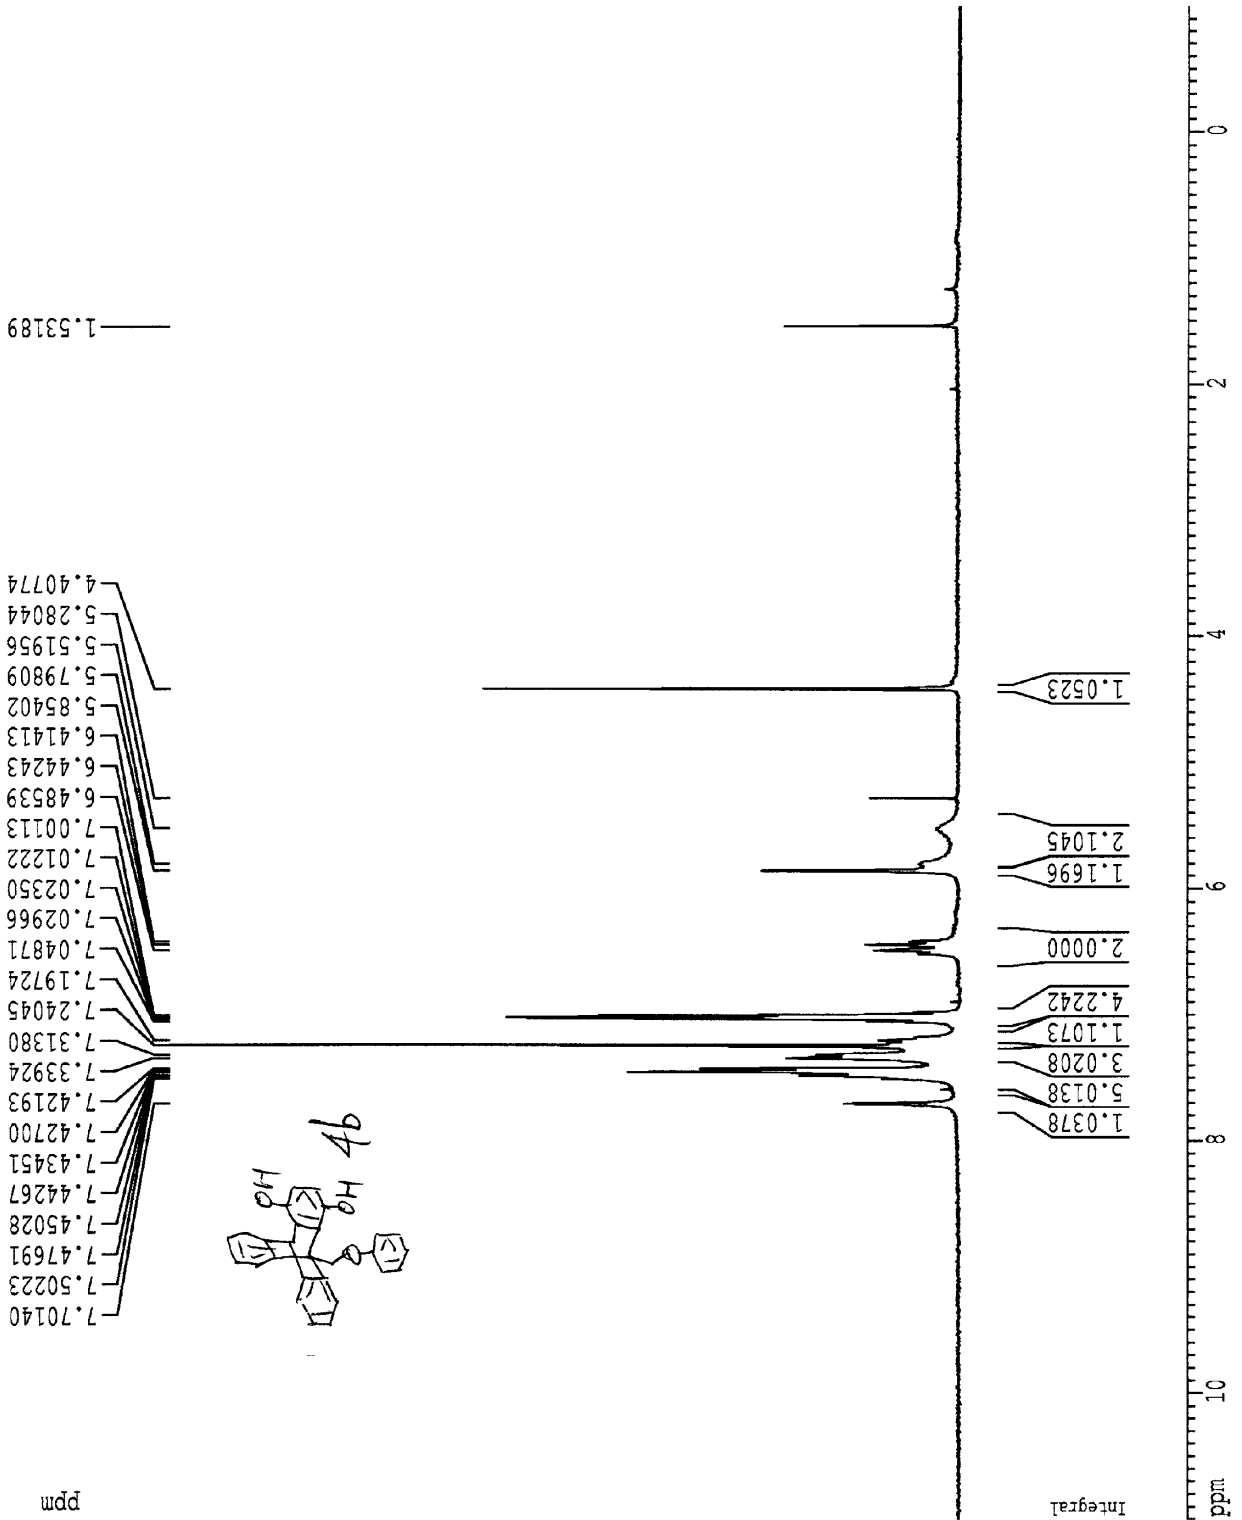

Current Data Parameters  
 NAME nitrodiphenol5  
 EXPNO 1  
 PROCNO 1

F2 - Acquisition Parameters  
 Date\_ 20051230  
 Time 16.57  
 INSTRUM spect  
 PROBED 5 mm Multinu  
 PULPROG zg30  
 TD 32768  
 SOLVENT DMSO  
 NS 16  
 DS 2  
 SWH 6188.119 Hz  
 FIDRES 0.188846 Hz  
 AQ 2.6477044 sec  
 RG 574.7  
 DW 80.800 usec  
 DE 6.00 usec  
 TE 300.0 K  
 D1 1.0000000 sec  
 F1 14.10 usec  
 SF01 300.1318534 MHz  
 NUC1 1H  
 PL1 3.00 dB

F2 - Processing parameters  
 SI 16384  
 SF 300.1300040 MHz  
 WDW EM  
 SSB 0  
 LB 0.30 Hz  
 GB 0  
 PC 1.00

1D NMR plot parameters  
 CX 20.00 cm  
 F1P 9.506 ppm  
 F1 2853.12 Hz  
 F2P 2.217 ppm  
 F2 665.43 Hz  
 PPMCM 0.36446 ppm/cm  
 HZCM 109.38480 Hz/cm

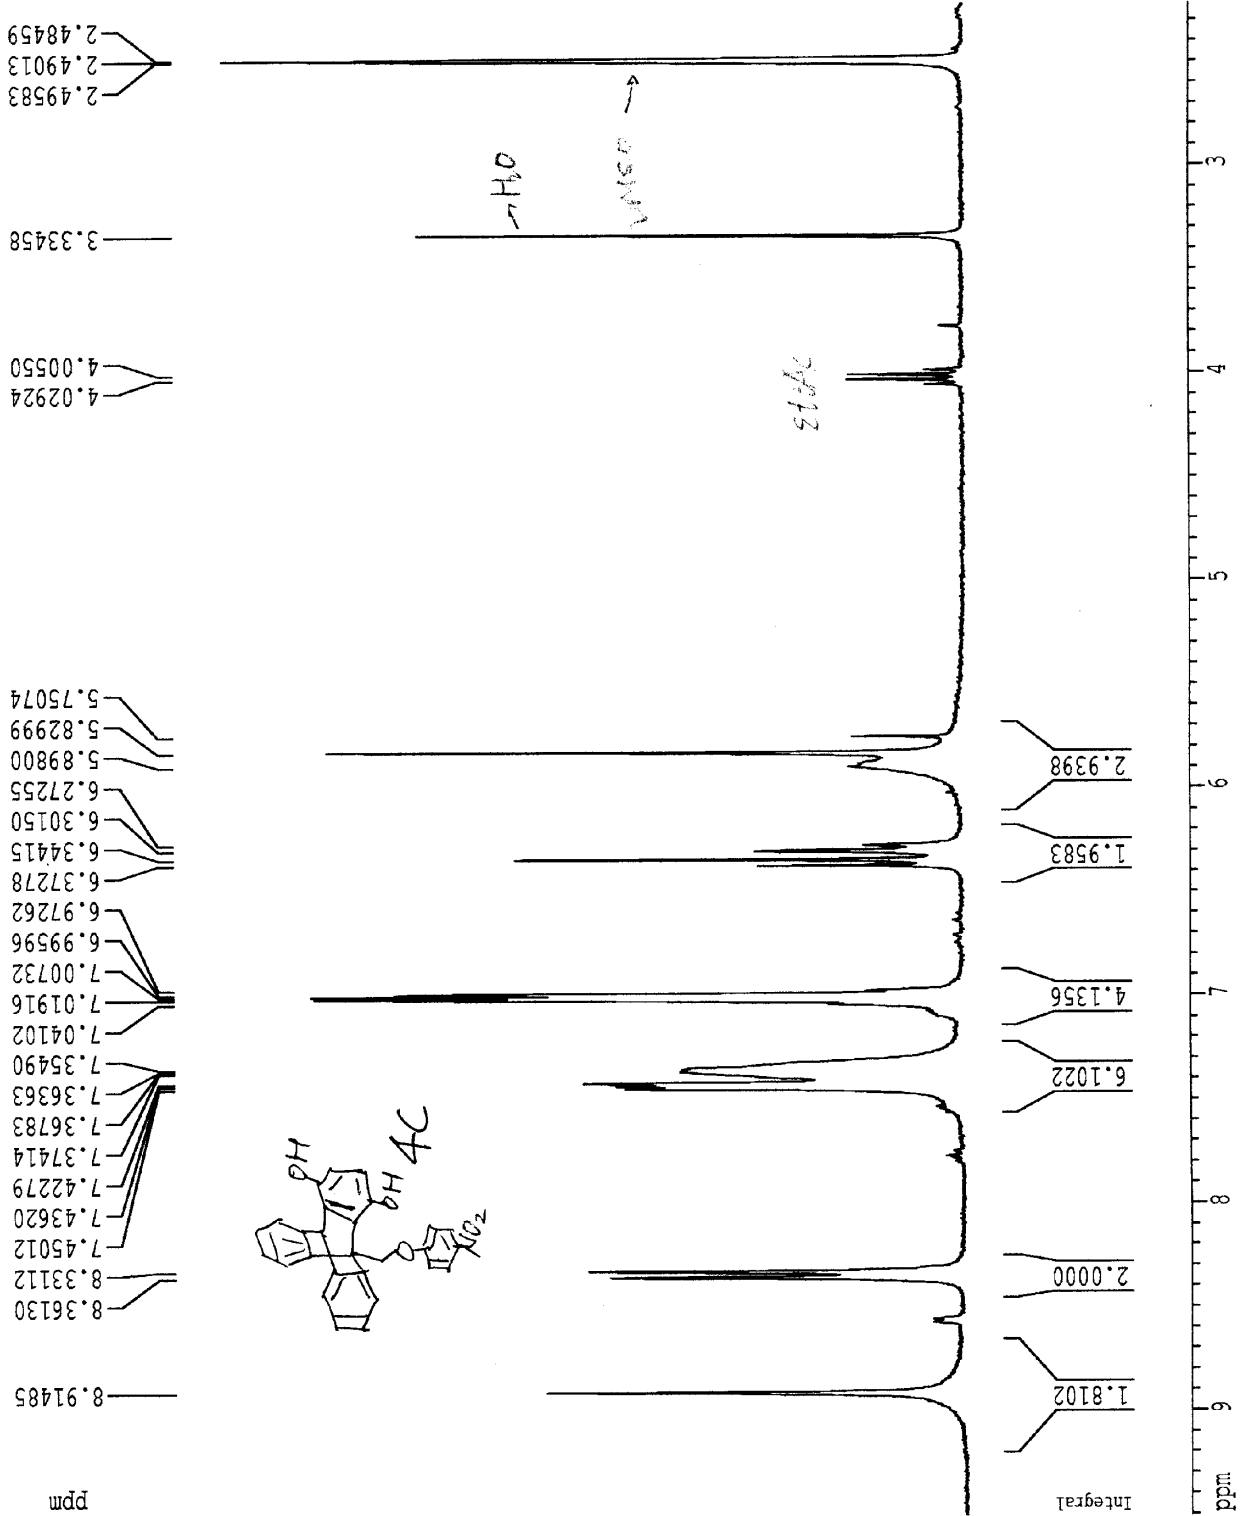

Current Data Parameters  
 NAME mepheno1d1014  
 EXPNO 4  
 PROCNO 1

F2 - Acquisition Parameters

Date\_ 20060530  
 Time 9.42  
 INSTRUM spect  
 PROBHD 5 mm QNP 1H  
 PULPROG zg30  
 TD 32768  
 SOLVENT CDC13  
 NS 64  
 DS 2  
 SWH 4111.842 Hz  
 FIDRES 0.125483 Hz  
 AQ 3.9846387 sec  
 RG 4096  
 DW 121.600 usec  
 DE 6.00 usec  
 TE 300.0 K  
 D1 1.00000000 sec  
 P1 6.30 usec  
 SF01 200.1312359 MHz  
 NUC1 1H  
 PL1 -6.00 dB

F2 - Processing parameters

SI 16384  
 SF 200.1300128 MHz  
 MDW EM  
 SSB 0  
 LB 0.30 Hz  
 GB 0  
 PC 1.00

1D NMR plot parameters

CX 20.00 cm  
 F1P 8.336 ppm  
 F1 1668.26 Hz  
 F2P 2.105 ppm  
 F2 421.24 Hz  
 PPMCM 0.31155 ppm/cm  
 HZCM 62.35074 Hz/cm

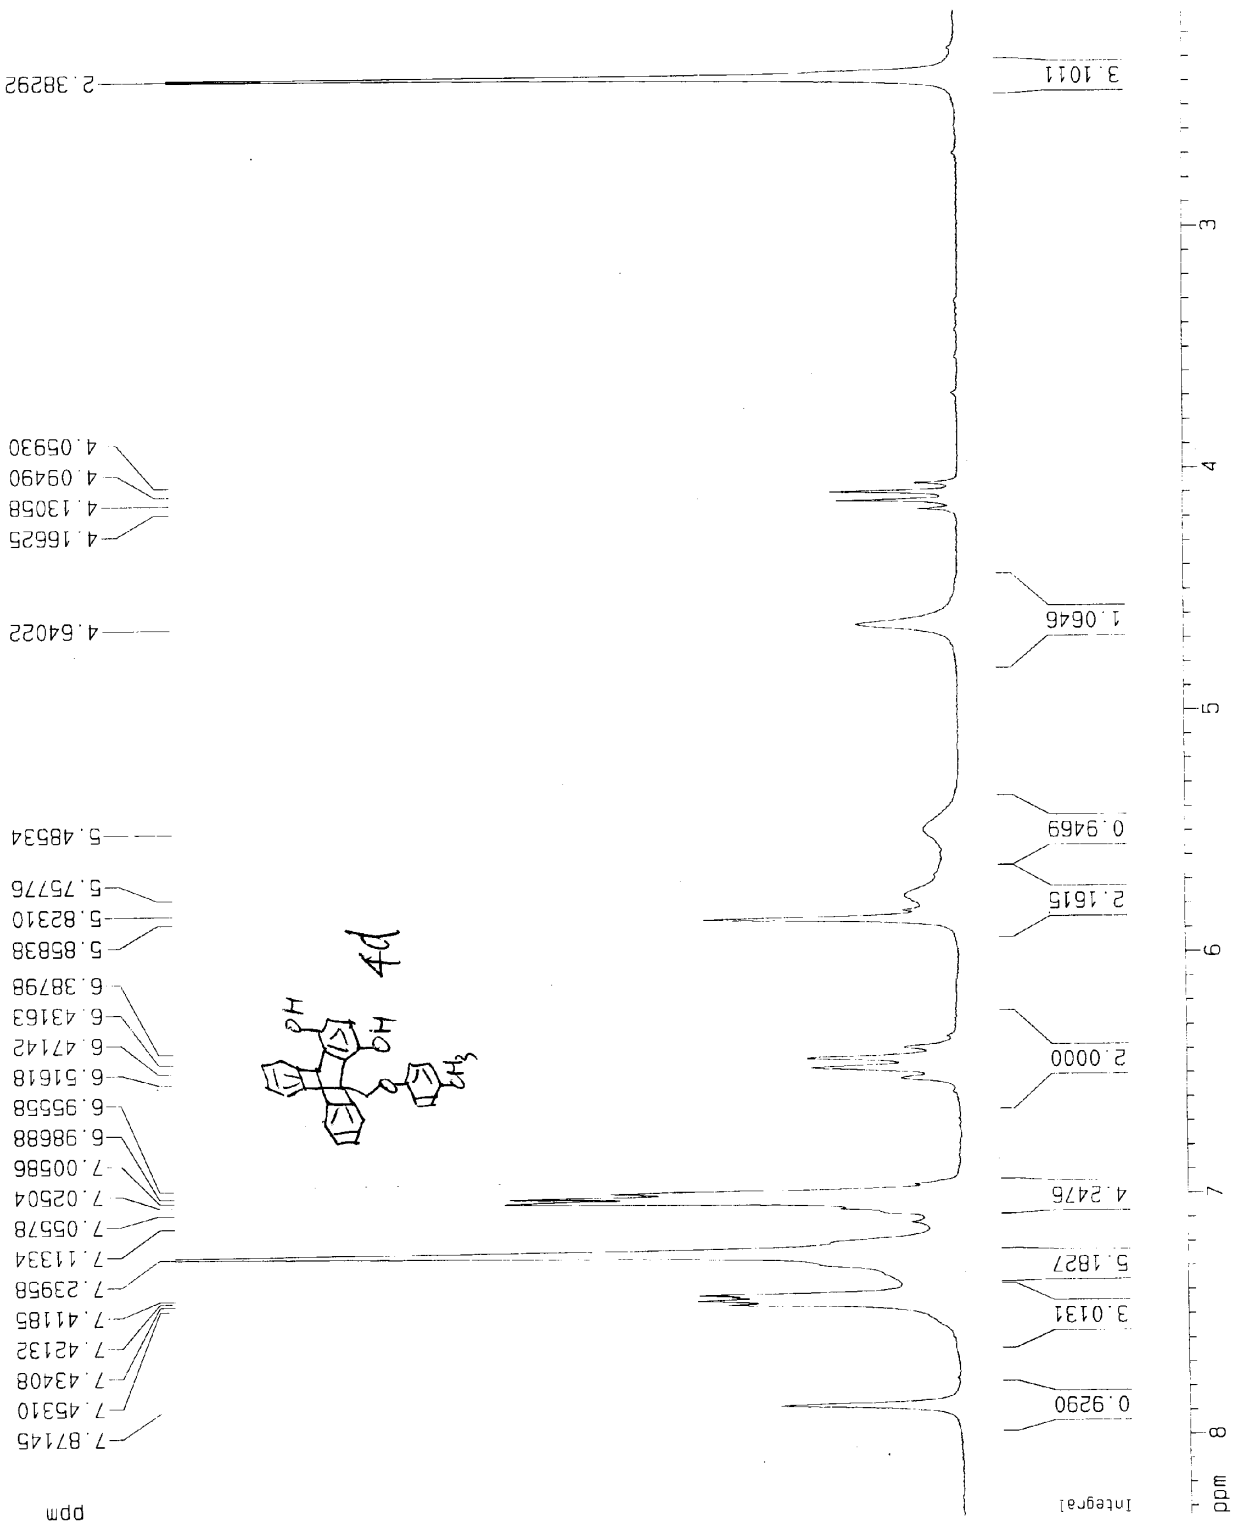

Current Data Parameters  
NAME meophenoldiol2  
EXPNO 1  
PROCNO 1

F2 - Acquisition Parameters  
Date\_ 20060524  
Time 21.12  
INSTRUM spect  
PROBHD 5 mm Multinu  
PULPROG zg30  
TD 32768  
SOLVENT DMSO  
NS 64  
DS 2  
SWH 6188.119 Hz  
FIDRES 0.188846 Hz  
AQ 2.647704 sec  
RG 1024  
DW 80.800 usec  
DE 6.00 usec  
TE 300.0 K  
D1 1.0000000 sec  
F1 14.10 usec  
SFO1 300.1318534 MHz  
NUC1 1H  
P11 3.00 dB

F2 - Processing parameters  
SI 16384  
SF 300.1300040 MHz  
WDW EM  
SSB 0  
LB 0.30 Hz  
GB 0  
PC 1.00

1D NMR plot parameters  
CX 20.00 cm  
F1P 9.958 ppm  
F1 2988.62 Hz  
F2P 2.137 ppm  
F2 641.41 Hz  
PPMCM 0.39103 ppm/cm  
HZCM 117.36087 Hz/cm

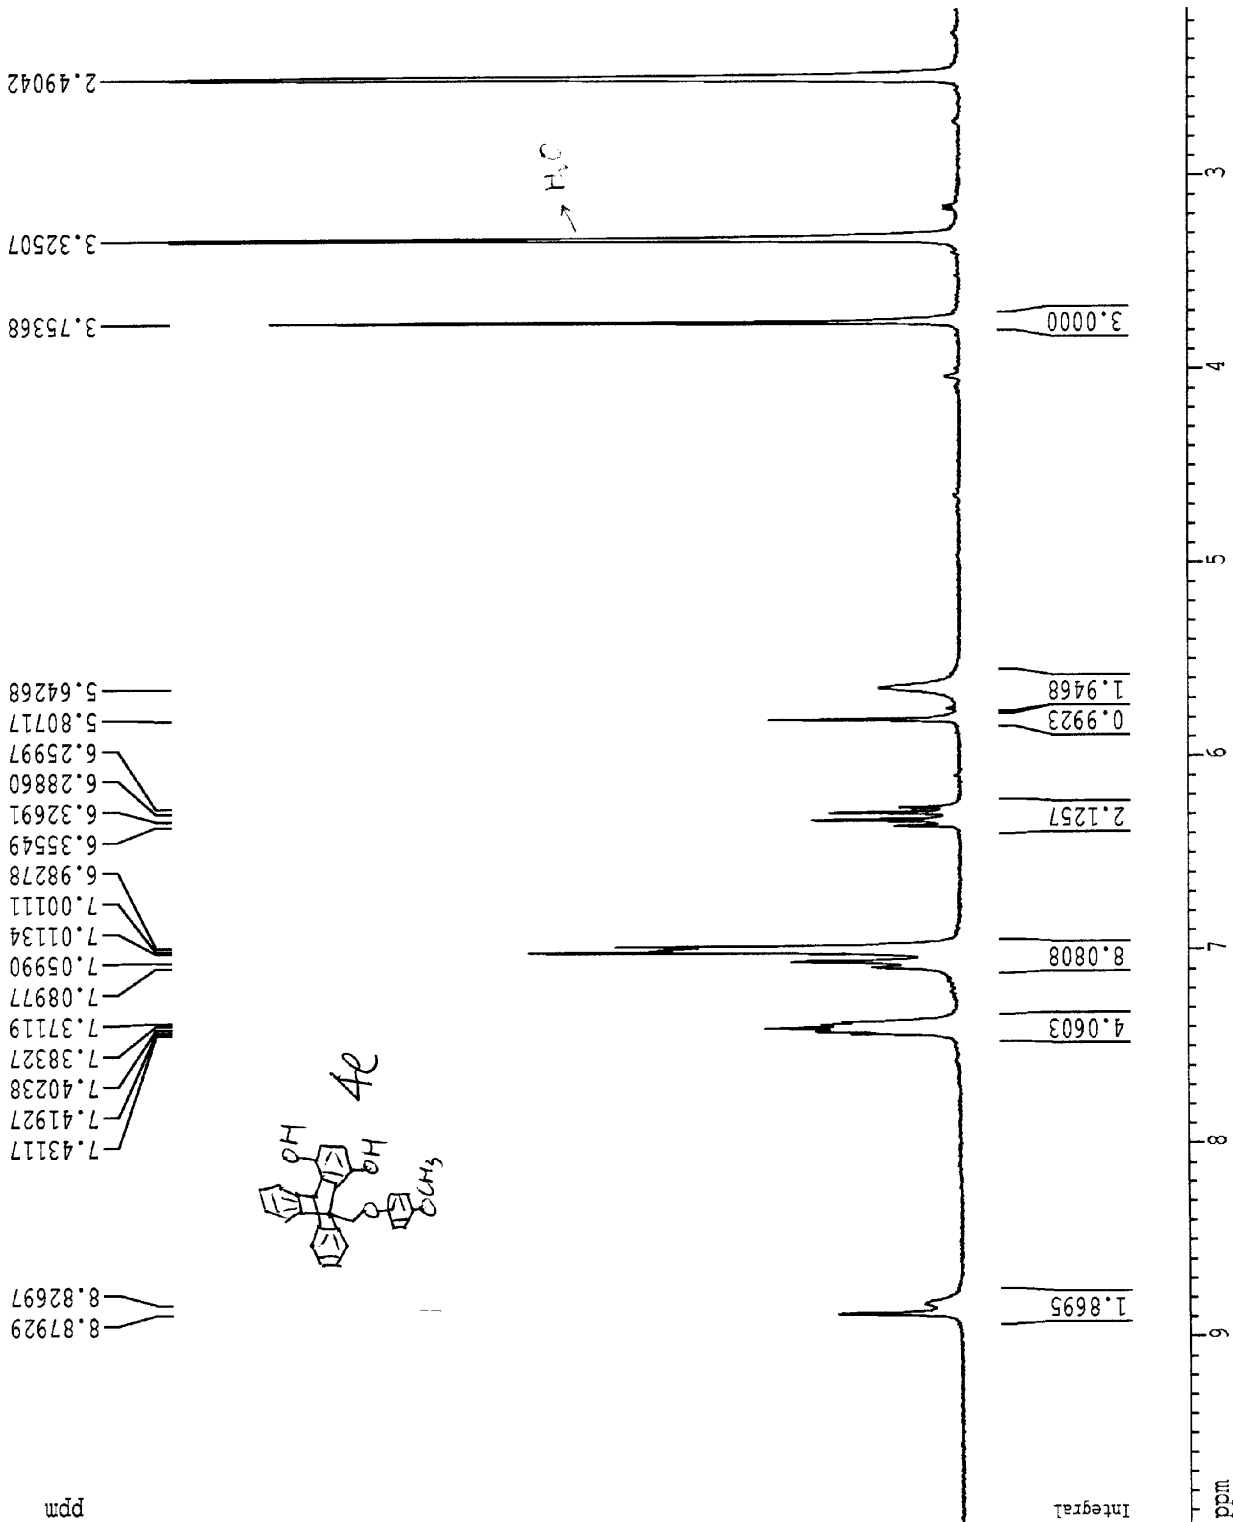



Current Data Parameters  
 NAME dimephrendiol3  
 EXPNO 1  
 PROCNO 1

F2 - Acquisition Parameters

Date\_ 20060525  
 Time 14.45  
 INSTRUM spect  
 PROBHD 5 mm QNP 1H  
 PULPROG zg30  
 TD 32768  
 SOLVENT CDCl3  
 NS 32  
 DS 2  
 SWH 4111.842 Hz  
 FIDRES 0.125483 Hz  
 AQ 3.9846387 sec  
 RG 8192  
 DW 121.600 usec  
 DE 6.00 usec  
 TE 300.0 K  
 D1 1.00000000 sec  
 P1 6.30 usec  
 SF01 200.1312359 MHz  
 NUC1 1H  
 PL1 -6.00 dB

F2 - Processing parameters

SI 16384  
 SF 200.1300131 MHz  
 WDW EM  
 SSB 0  
 LB 0.30 Hz  
 GB 0  
 PC 1.00

1D NMR plot parameters

CX 20.00 cm  
 F1P 8.333 ppm  
 F1 1667.63 Hz  
 F2P 1.648 ppm  
 F2 369.93 Hz  
 PPMCM 0.32421 ppm/cm  
 HZCM 64.88506 Hz/cm

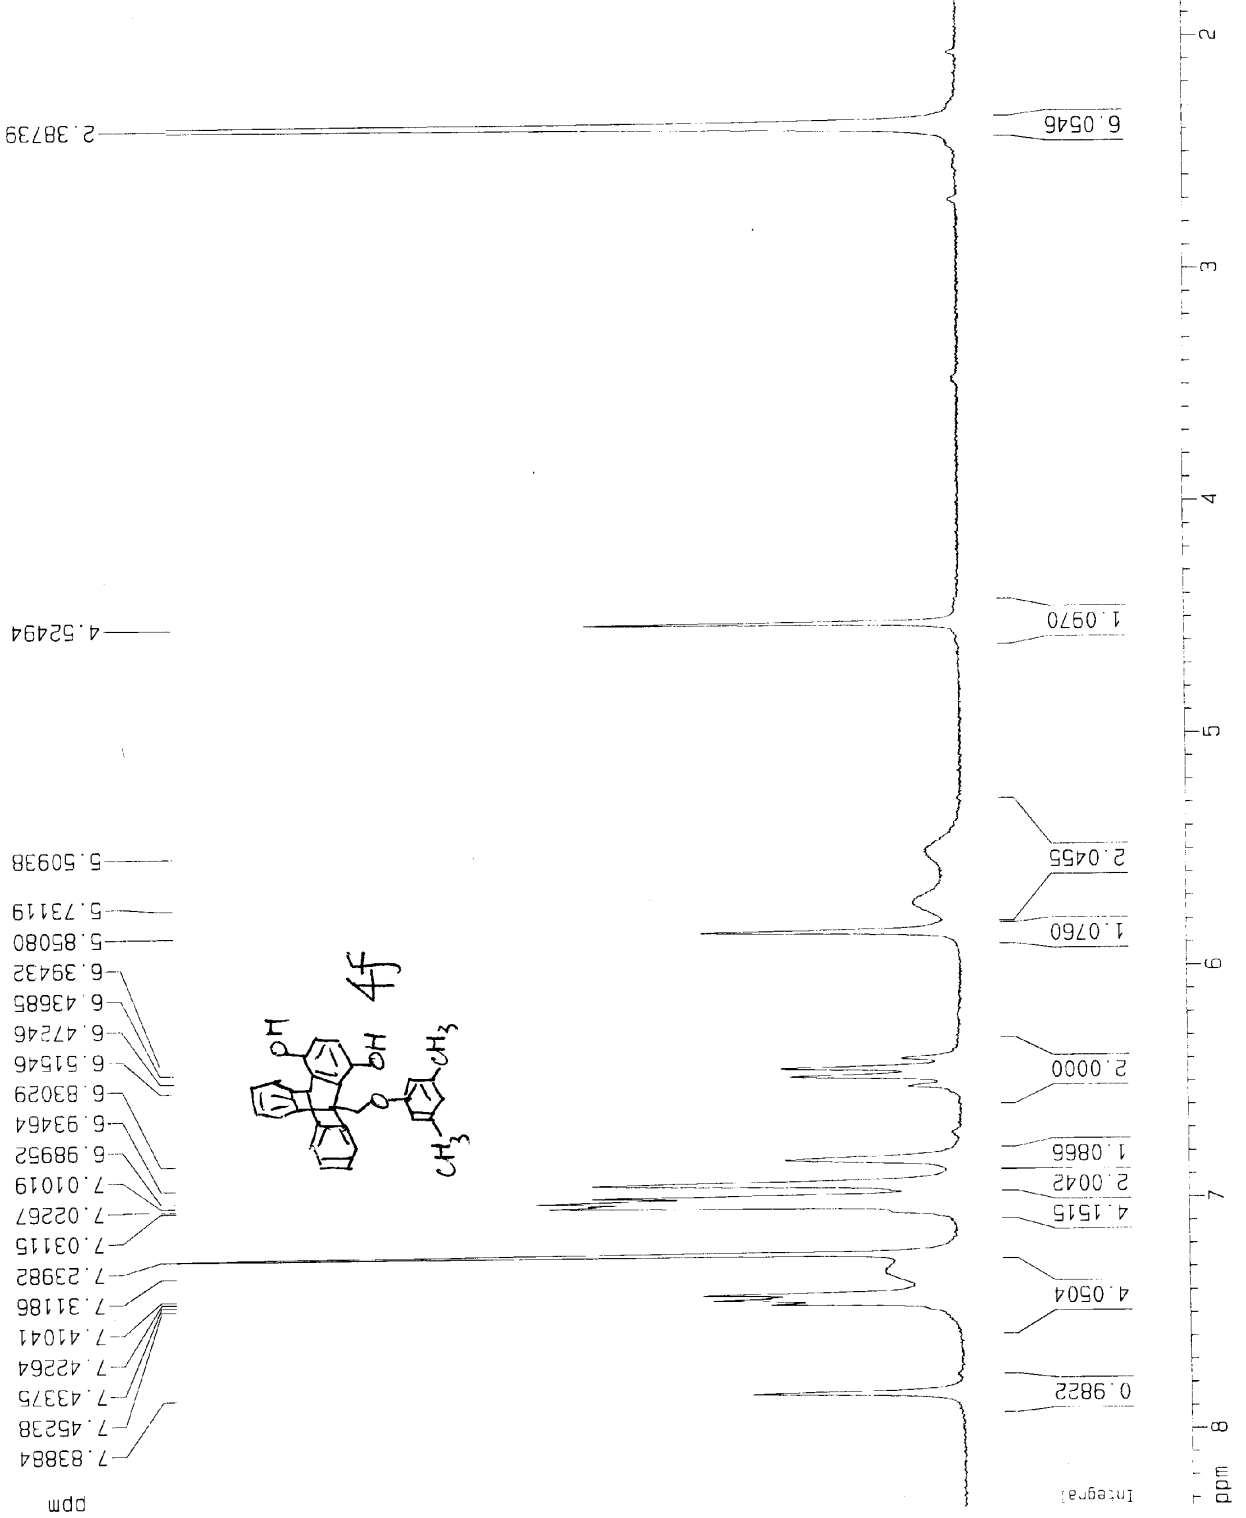

Current Data Parameters

NAME trimphenidol13  
EXPNO 1  
PROCNO 1

F2 - Acquisition Parameters

Date\_ 20060525  
Time 14.00  
INSTRUM spect  
PROBHD 5 mm GNP 1H  
PULPROG zg30  
TD 32768  
SOLVENT CDC13  
NS 32  
DS 2  
SWH 4111.842 Hz  
FIDRES 0.125483 Hz  
AQ 3.9846387 sec  
RG 8192  
DW 121.600 usec  
DE 6.00 usec  
TE 300.0 K  
D1 1.00000000 sec  
P1 6.30 usec  
SF01 200.1312359 MHz  
NUC1 1H  
PL1 -6.00 dB

F2 - Processing parameters

SI 16384  
SF 200.1300128 MHz  
WDW EM  
SSB 0  
LB 0.30 Hz  
GB 0  
PC 1.00

1D NMR plot parameters

CX 20.00 cm  
F1P 11.000 ppm  
F1 2201.43 Hz  
F2P -1.000 ppm  
F2 -200.13 Hz  
PPMCM 0.50000 ppm/cm  
HZCM 120.07801 Hz/cm

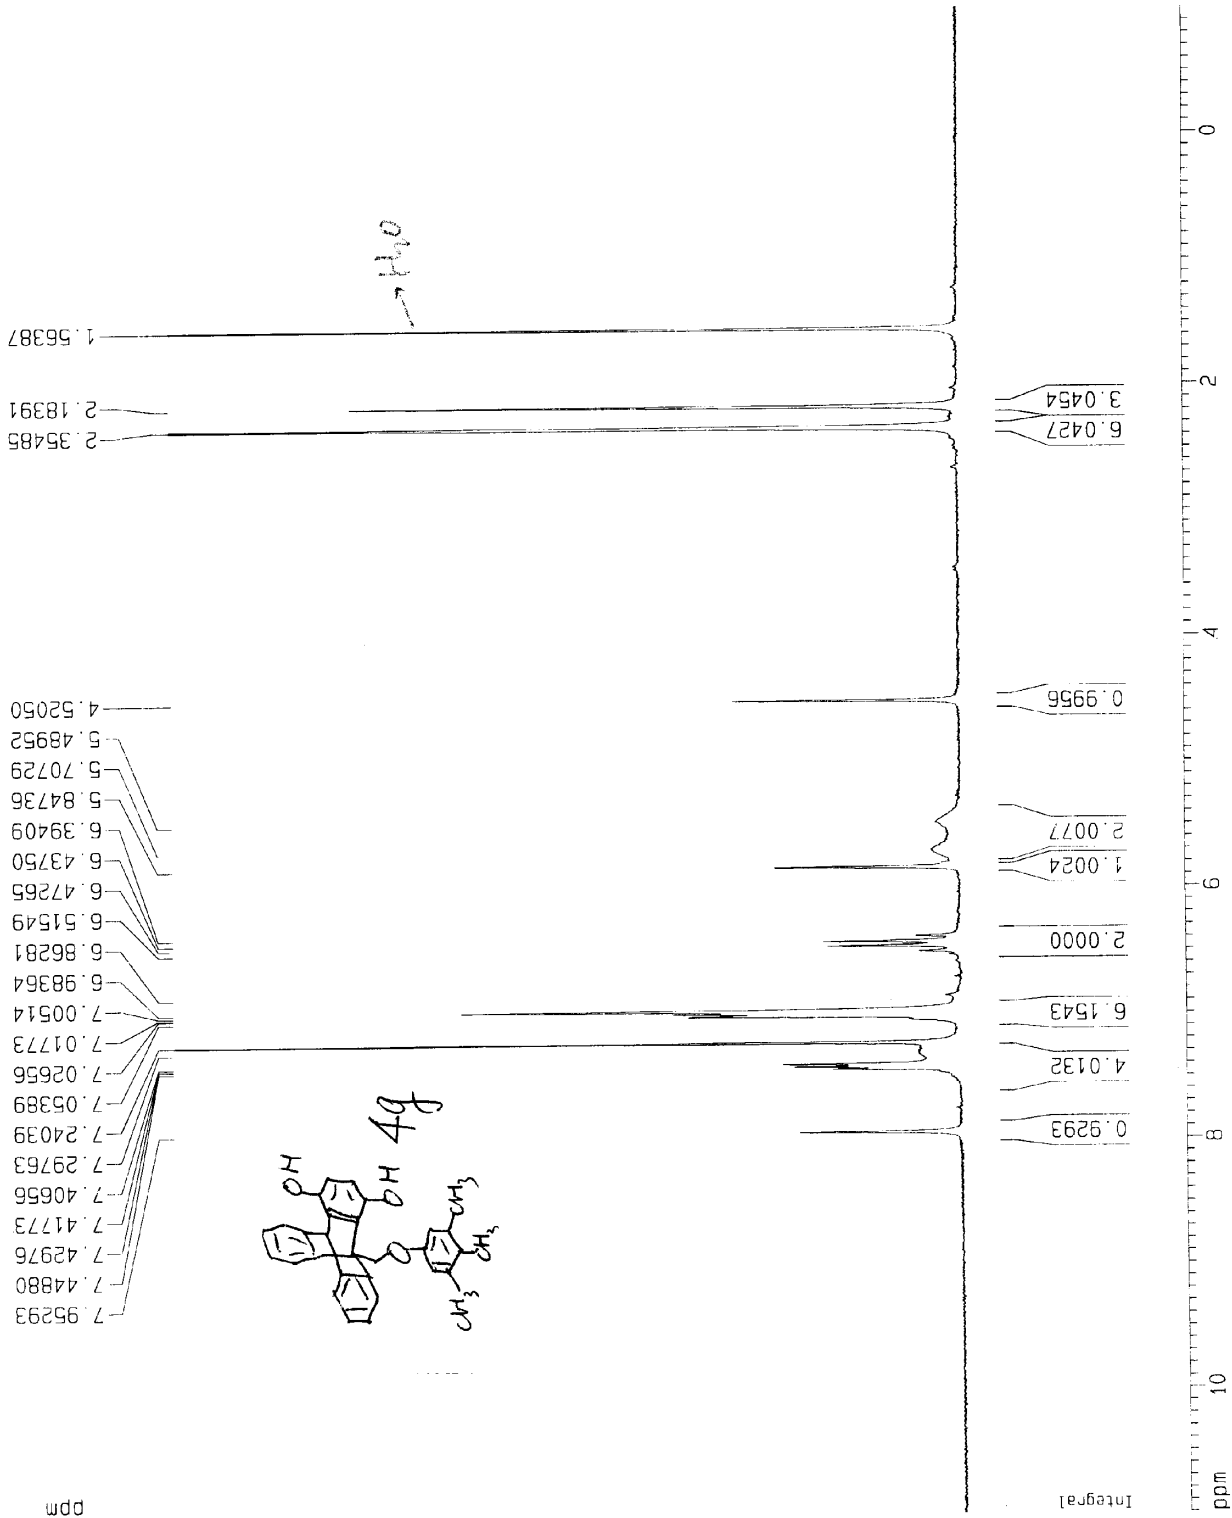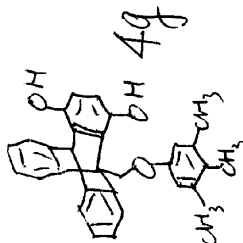

Current Data Parameters

NAME tetramediol4  
 EXPNO 1  
 PROCNO 1

F2 - Acquisition Parameters

Date\_ 20060525  
 Time 11.14  
 INSTRUM spect  
 PROBED 5 mm Multinu  
 PULPROG zg30  
 TD 32768  
 SOLVENT CDC13  
 NS 32  
 DS 2  
 SWH 6188.119 Hz  
 FIDRES 0.188846 Hz  
 AQ 2.6477044 sec  
 RG 1290.2  
 DW 80.800 usec  
 DE 6.00 usec  
 TE 300.0 K  
 D1 1.00000000 sec  
 P1 14.10 usec  
 SFO1 300.1318534 MHz  
 NUC1 1H  
 PL1 3.00 dB

F2 - Processing parameters

SI 16384  
 SF 300.1300125 MHz  
 WDW EM  
 SSB 0  
 LB 0.30 Hz  
 GB 0  
 PC 1.00

1D NMR plot parameters

CX 20.00 cm  
 F1P 11.000 ppm  
 F1 3301.43 Hz  
 F2P -1.000 ppm  
 F2 -300.13 Hz  
 PPMCM 0.60000 ppm/cm  
 HZCM 180.07800 Hz/cm

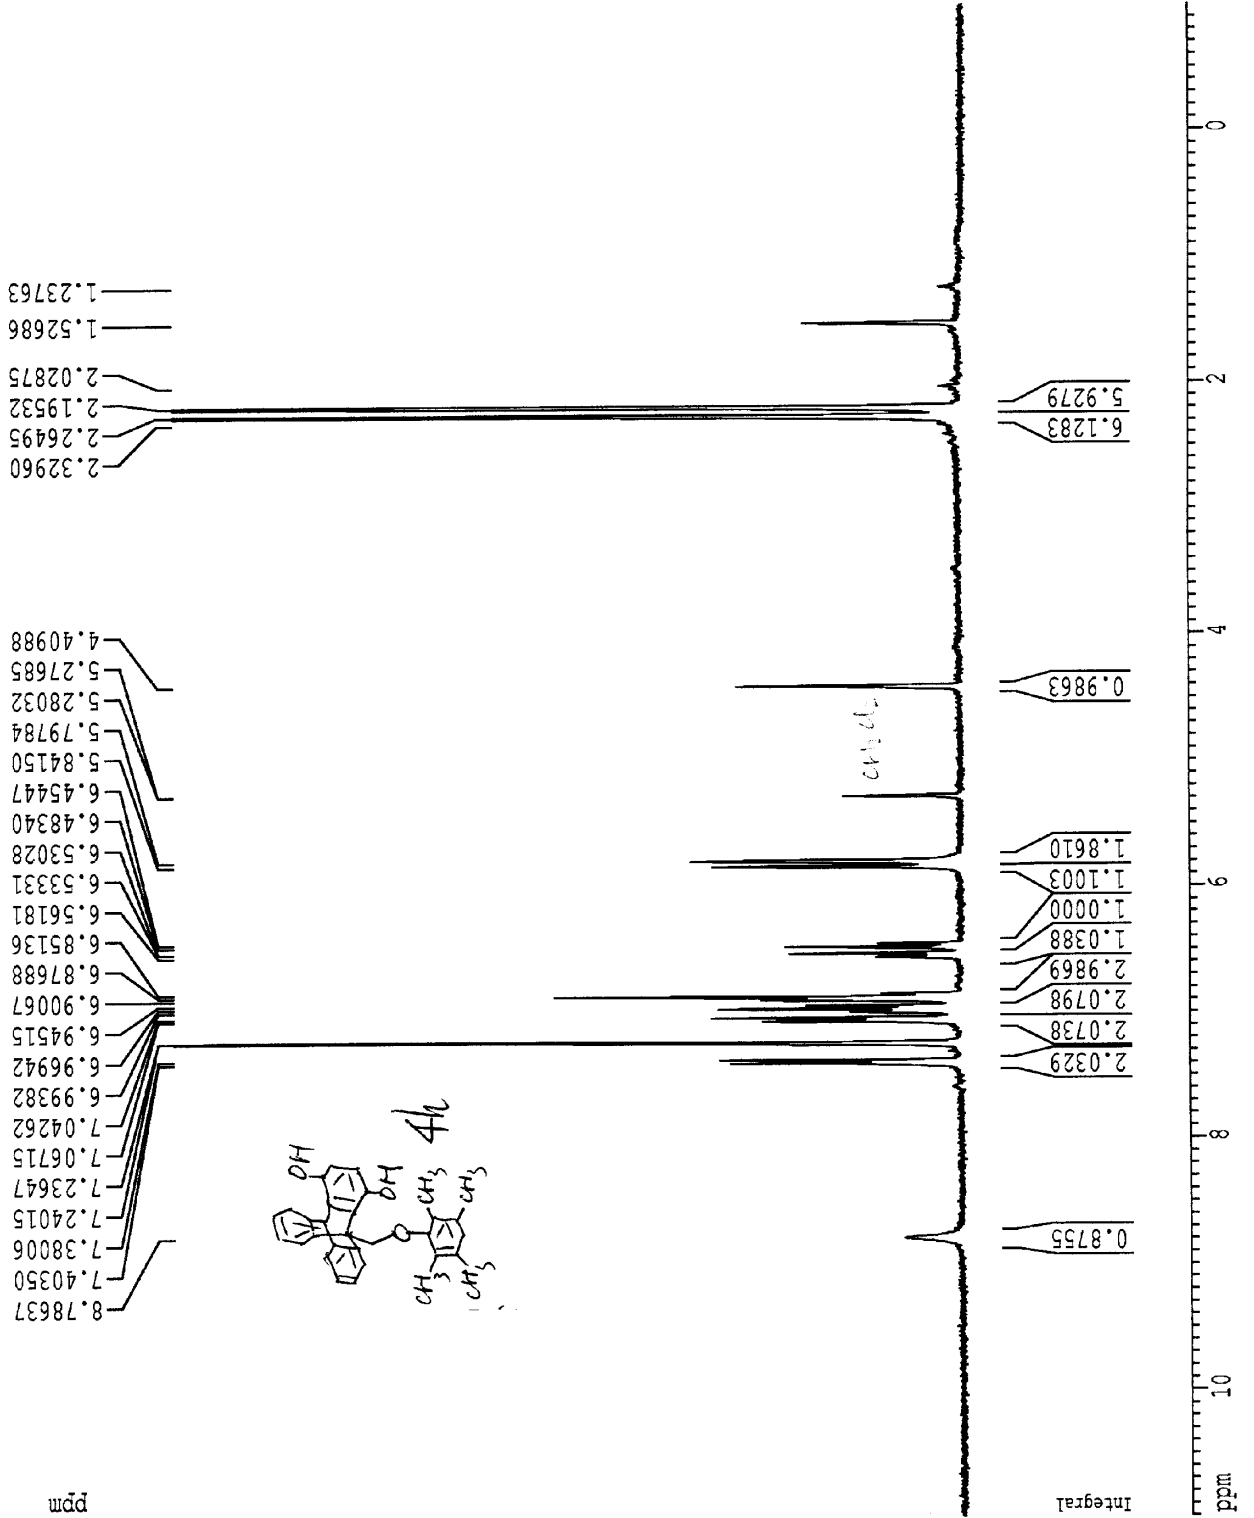

Current Data Parameters  
 NAME dimentbu  
 EXPNO 1  
 PROCNO 1

F2 - Acquisition Parameters  
 Date\_ 20051226  
 Time 19.15  
 INSTRUM spect  
 PROBHD 5 mm Multinu  
 PULPROG zg30  
 ID 32768  
 SOLVENT CDCl3  
 NS 16  
 DS 2  
 SWH 6188.119 Hz  
 FIDRES 0.188846 Hz  
 AQC 2.6477044 sec  
 RG 90.5  
 DW 80.800 usec  
 DE 6.00 usec  
 TE 300.0 K  
 D1 1.0000000 sec  
 F1 14.10 usec  
 SFO1 300.1318534 MHz  
 NUC1 1H  
 PL1 3.00 dB

F2 - Processing parameters  
 SI 16384  
 SF 300.1300117 MHz  
 WDW EM  
 SSB 0  
 LB 0.30 Hz  
 GB 0  
 PC 1.00

1D NMR plot parameters  
 CX 20.00 cm  
 F1P 11.000 ppm  
 F1 3301.43 Hz  
 F2P -1.000 ppm  
 F2 -300.13 Hz  
 PPMCM 0.60000 ppm/cm  
 HZCM 180.07800 Hz/cm

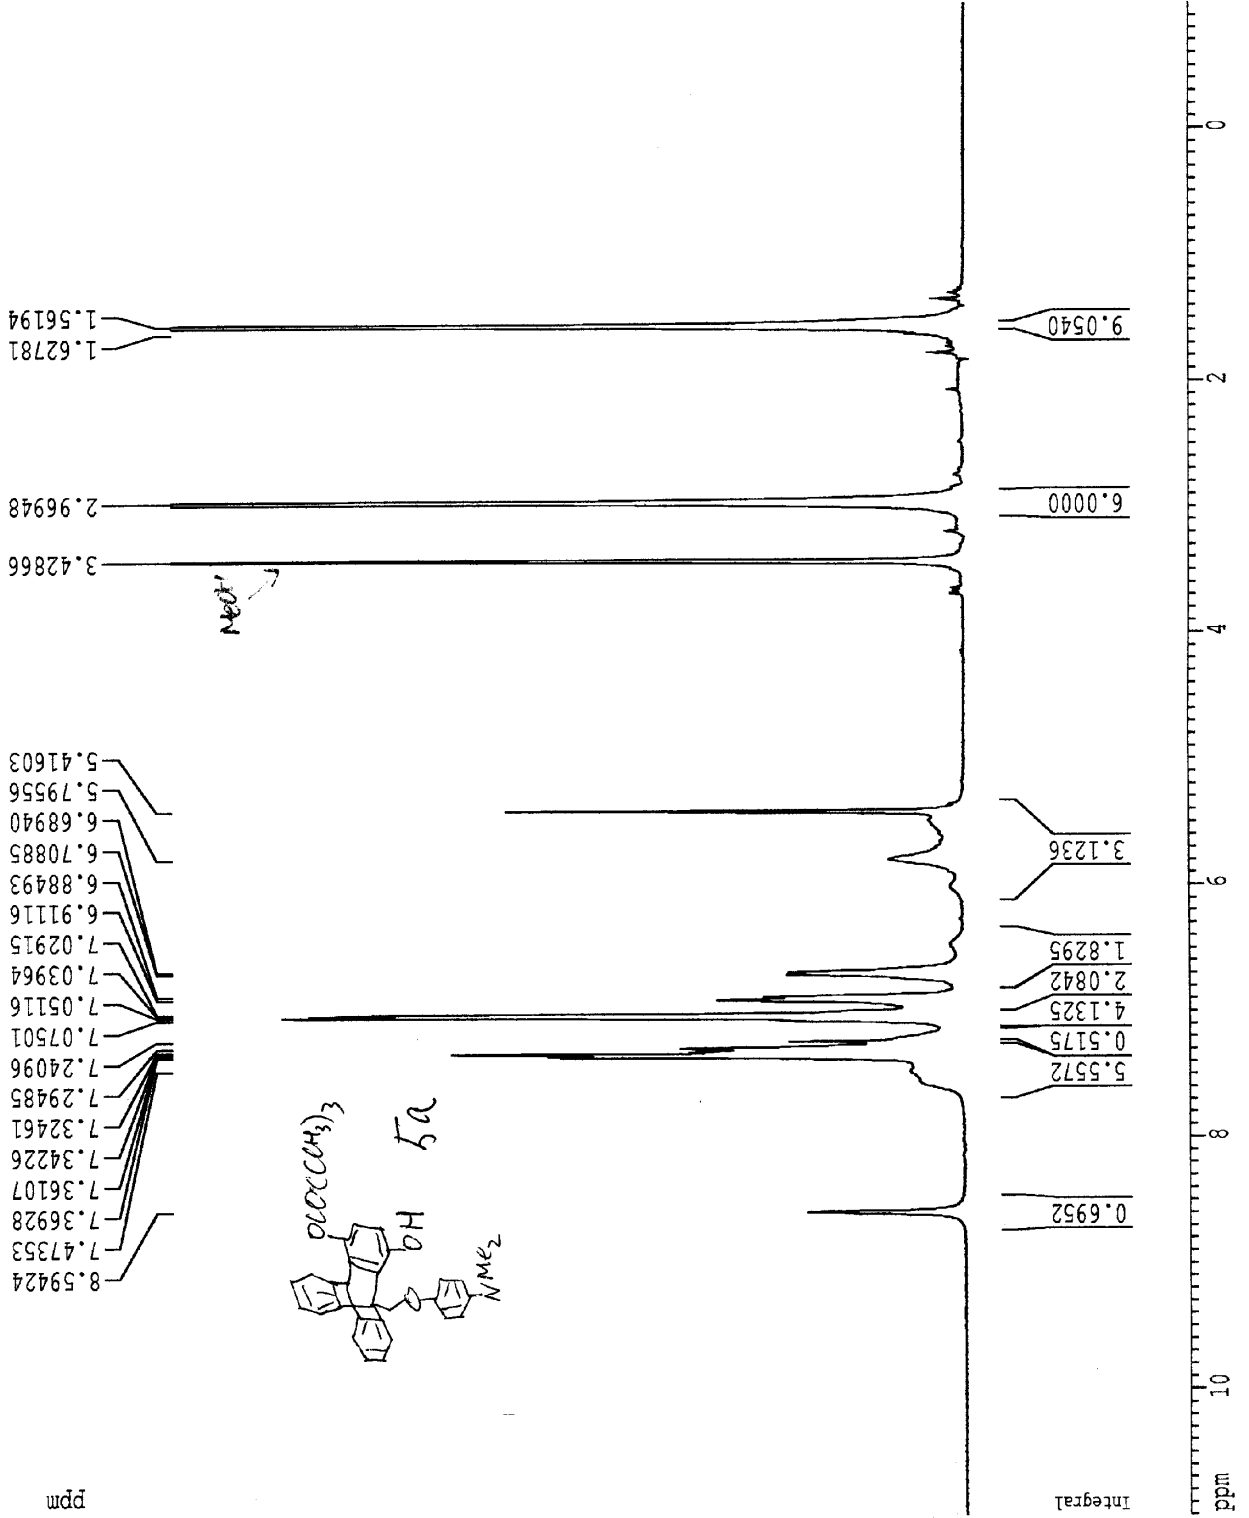

Current Data Parameters  
 NAME hphenolbua6  
 EXPNO 1  
 PROCNO 1

F2 - Acquisition Parameters  
 Date\_ 20060102  
 Time 13.48  
 INSTRUM spect  
 PROBED 5 mm Multinu  
 PULPROG zg30  
 TD 32768  
 SOLVENT CDCl3  
 NS 16  
 DS 2  
 SWH 6188.119 Hz  
 FIDRES 0.188846 Hz  
 AQ 2.6477044 sec  
 RG 362  
 DW 80.800 usec  
 DE 6.00 usec  
 TE 300.0 K  
 D1 1.0000000 sec  
 F1 14.10 usec  
 SFO1 300.1318534 MHz  
 NUC1 1H  
 PL1 3.00 dB

F2 - Processing parameters  
 SI 16384  
 SF 300.1300121 MHz  
 WDW EM  
 SSB 0  
 LB 0.30 Hz  
 GB 0  
 PC 1.00

1D NMR plot parameters  
 CX 20.00 cm  
 F1P 11.000 ppm  
 F1 3301.43 Hz  
 F2P -1.000 ppm  
 F2 -300.13 Hz  
 PPMCM 0.60000 ppm/cm  
 HZCM 180.07800 Hz/cm

2.03774  
 1.73495  
 1.61266  
 1.59132  
 1.52427  
 1.30983  
 1.27372  
 1.24986  
 1.23364  
 1.22601

8.05068  
 7.48886  
 7.46405  
 7.34900  
 7.33213  
 7.32458  
 7.31516  
 7.30901  
 7.30423  
 7.24017  
 7.21203  
 7.05029  
 7.03116  
 7.02400  
 7.01321  
 7.00166  
 6.99447  
 6.67070  
 6.63933  
 5.77339  
 5.55545  
 5.37745  
 4.12512  
 4.10131

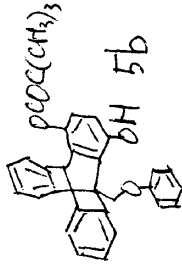

9.2423

0.7515  
 3.0054  
 5.0141  
 1.1252  
 4.2066  
 1.8238  
 2.1975  
 1.0000

ppm

Integral

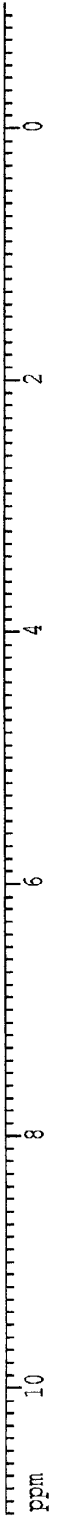

Current Data Parameters  
 NAME no2phenoltnu3  
 EXPNO 1  
 PROCNO 1

F2 - Acquisition Parameters  
 Date\_ 20060103  
 Time 16.55  
 INSTRUM spect  
 PROBED 5 mm Multinu  
 PULPROG zg30  
 TD 32768  
 SOLVENT CDCl3  
 NS 16  
 DS 2  
 SWH 6188.119 Hz  
 FIDRES 0.188846 Hz  
 AQ 2.6477044 sec  
 RG 406.4  
 DW 80.800 usec  
 DE 6.00 usec  
 TE 300.0 K  
 D1 1.00000000 sec  
 P1 14.10 usec  
 SFO1 300.1318534 MHz  
 NUC1 1H  
 PL1 3.00 dB

F2 - Processing parameters  
 SI 16384  
 SF 300.1300117 MHz  
 WDW EM  
 SSB 0  
 LB 0.30 Hz  
 GB 0  
 PC 1.00

1D NMR plot parameters  
 CX 20.00 cm  
 FLP 11.000 ppm  
 F1 3301.43 Hz  
 F2P -1.000 ppm  
 F2 -300.13 Hz  
 PPMCM 0.60000 ppm/cm  
 HZCM 180.07800 Hz/cm

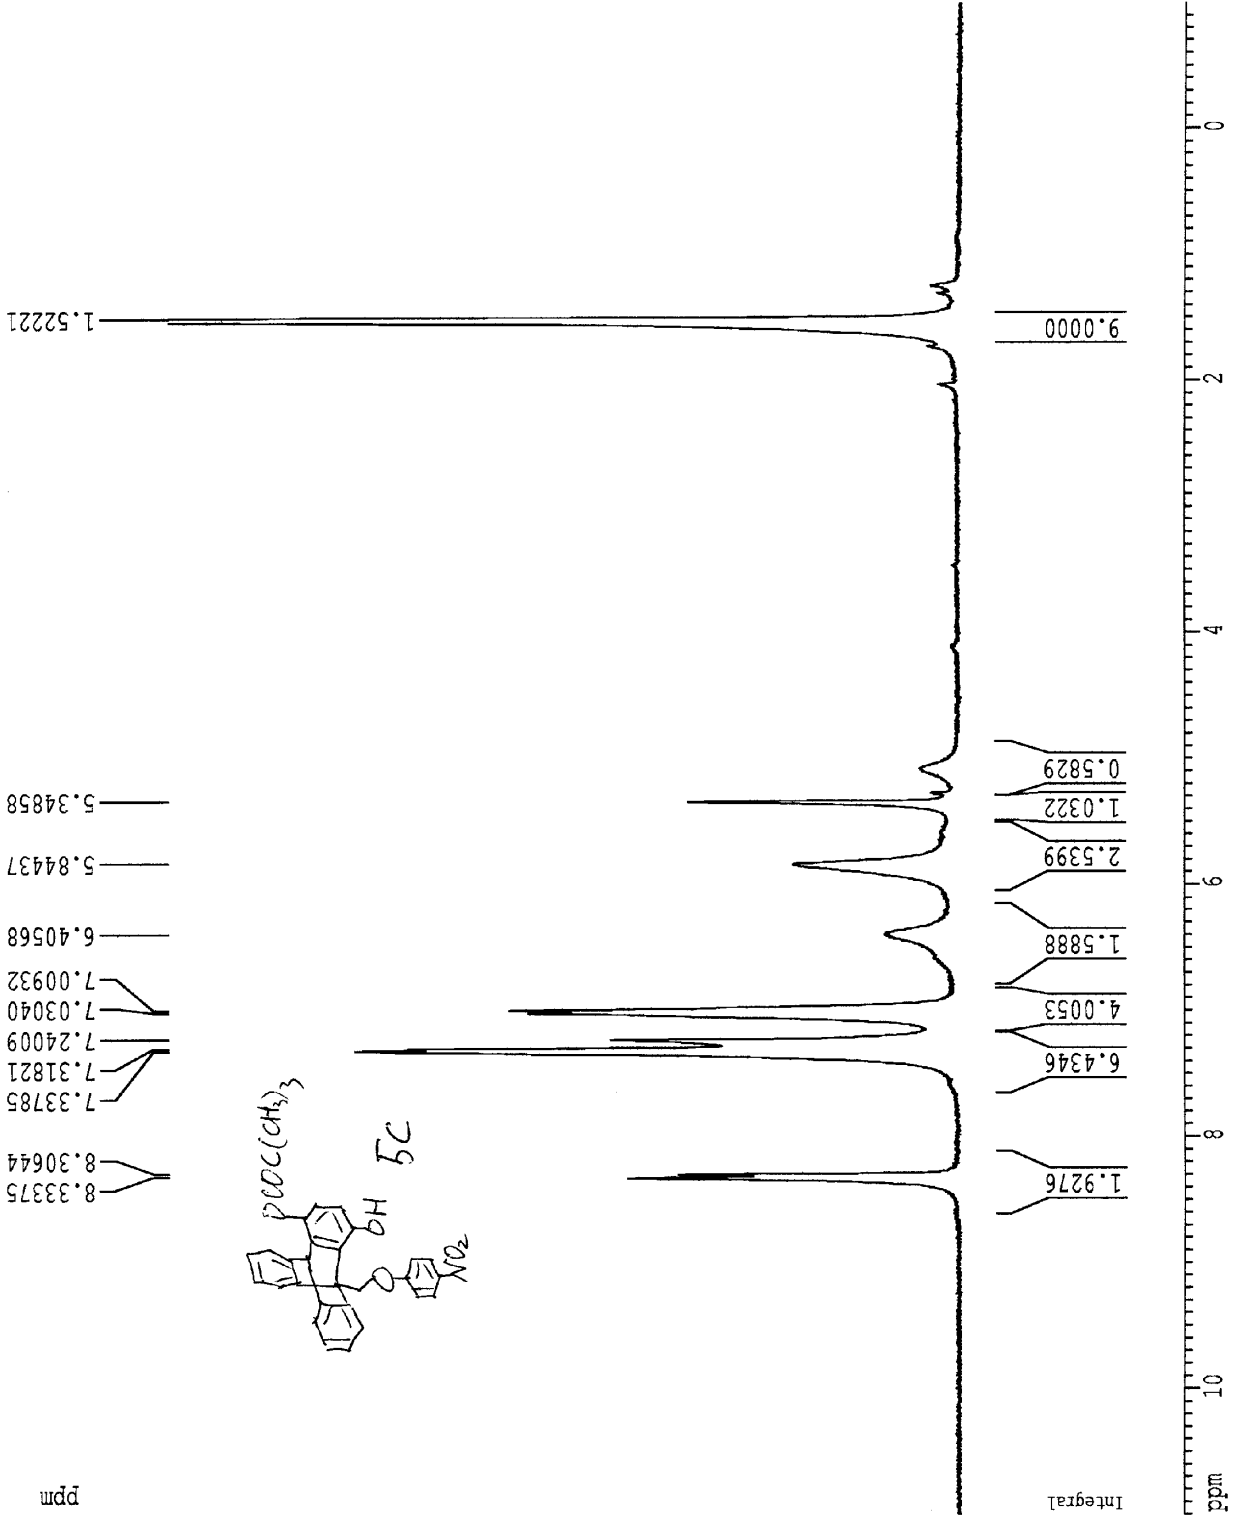

Current Data Parameters  
metriptbu2

NAME metriptbu2  
EXPNO 1  
PROCNO 1

F2 - Acquisition Parameters

Date\_ 20060525  
Time 16.22  
INSTRUM spect  
PROBHD 5 mm Multinu  
PULPROG zg30  
TD 32768  
SOLVENT CDCl3  
NS 32  
DS 2  
SWH 6188.119 Hz  
FIDRES 0.188846 Hz  
AQ 2.6477044 sec  
RG 1448.2  
DW 80.800 usec  
DE 6.00 usec  
TE 300.0 K  
D1 1.0000000 sec  
F1 14.10 usec  
SFO1 300.1318534 MHz  
NUC1 1H  
P11 3.00 dB

F2 - Processing parameters

SI 16384  
SF 300.1300125 MHz  
WDW EM  
SSB 0  
LB 0.30 Hz  
GB 0  
PC 1.00

1D NMR plot parameters

CX 20.00 cm  
FLP 11.090 ppm  
F1 3301.43 Hz  
F2F -1.000 ppm  
F2 -300.13 Hz  
PPMCM 0.60000 ppm/cm  
HZCM 180.07800 Hz/cm

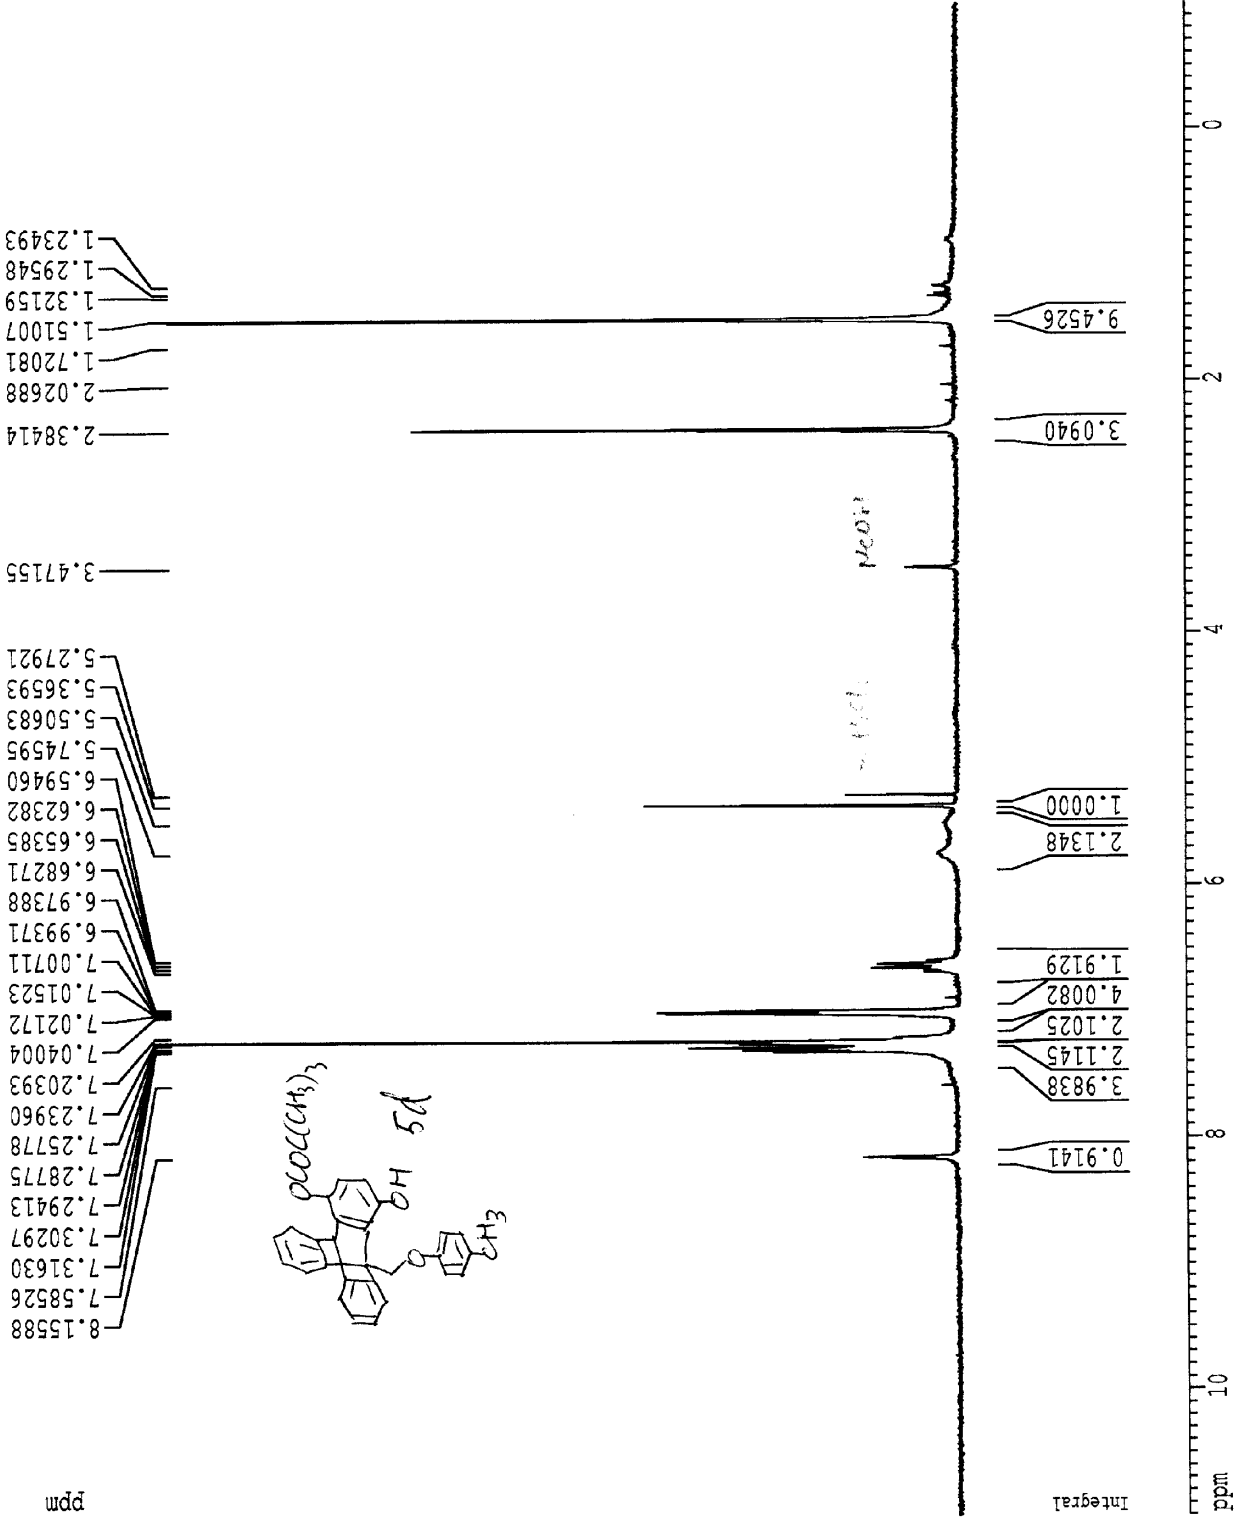

Current Data Parameters  
 NAME dimeotbu  
 EXPNO 1  
 PROCNO 1

F2 - Acquisition Parameters  
 Date\_ 20051226  
 Time 16.27  
 INSTRUM spect  
 PROBHD 5 mm Multinu  
 PULPROG zg30  
 TD 32768  
 SOLVENT CDCl3  
 NS 16  
 DS 2  
 SWH 6188.119 Hz  
 FIDRES 0.18846 Hz  
 AQ 2.6477044 sec  
 RG 143.7  
 DW 80.800 usec  
 DE 6.00 usec  
 TE 300.0 K  
 D1 1.00000000 sec  
 P1 14.10 usec  
 SFO1 300.1318534 MHz  
 NUC1 1H  
 PL1 3.00 dB

F2 - Processing parameters  
 SI 16384  
 SF 300.1300121 MHz  
 WDW EM  
 SSB 0  
 LB 0.30 Hz  
 GB 0  
 PC 1.00

1D NMR plot parameters  
 CX 20.00 cm  
 F1P 11.000 ppm  
 F1 3301.43 Hz  
 F2P -1.000 ppm  
 F2 -300.13 Hz  
 PPMCM 0.60000 ppm/cm  
 HZCM 180.07800 Hz/cm

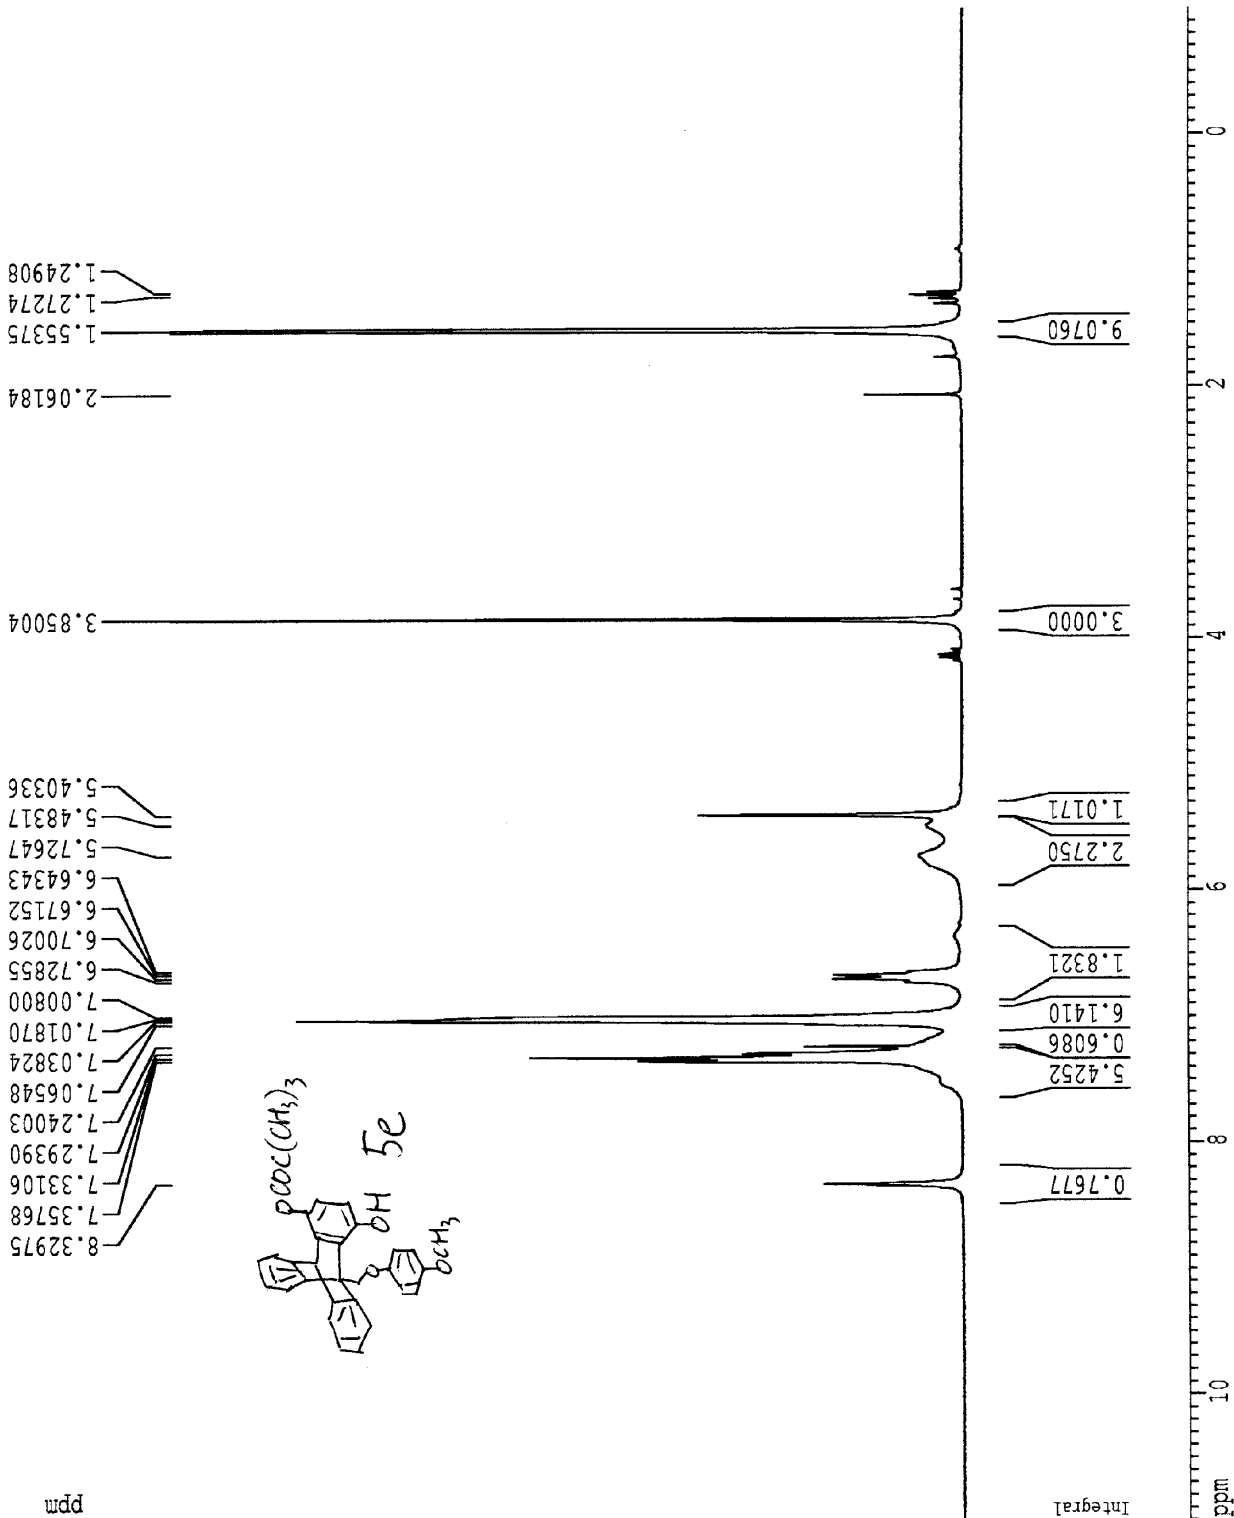



Current Data Parameters  
 NAME trimephenolbu  
 EXPNO 3  
 PROCNO 1

F2 - Acquisition Parameters

Date\_ 20060526  
 Time 16.38  
 INSTRUM spect  
 PROBHD 5 mm GNP 1H  
 PULPROG zg30  
 TD 32768  
 SOLVENT CDCl3  
 NS 32  
 DS 2  
 SWH 4111.842 Hz  
 FIDRES 0.125483 Hz  
 AQ 3.9846387 sec  
 RG 13004  
 DM 121.600 usec  
 DE 6.00 usec  
 TE 300.0 K  
 D1 1.00000000 sec  
 P1 6.30 usec  
 SF01 200.1312359 MHz  
 NUC1 1H  
 PL1 -6.00 dB

F2 - Processing parameters

SI 16384  
 SF 200.1300126 MHz  
 WDW EM  
 SSB 0  
 LB 0.30 Hz  
 GB 0  
 PC 1.00

1D NMR plot parameters

CX 20.00 cm  
 F1P 11.000 ppm  
 F1 2201.43 Hz  
 F2P -1.000 ppm  
 F2 -200.13 Hz  
 PPMCM 0.60000 ppm/cm  
 HZCM 120.07801 Hz/cm

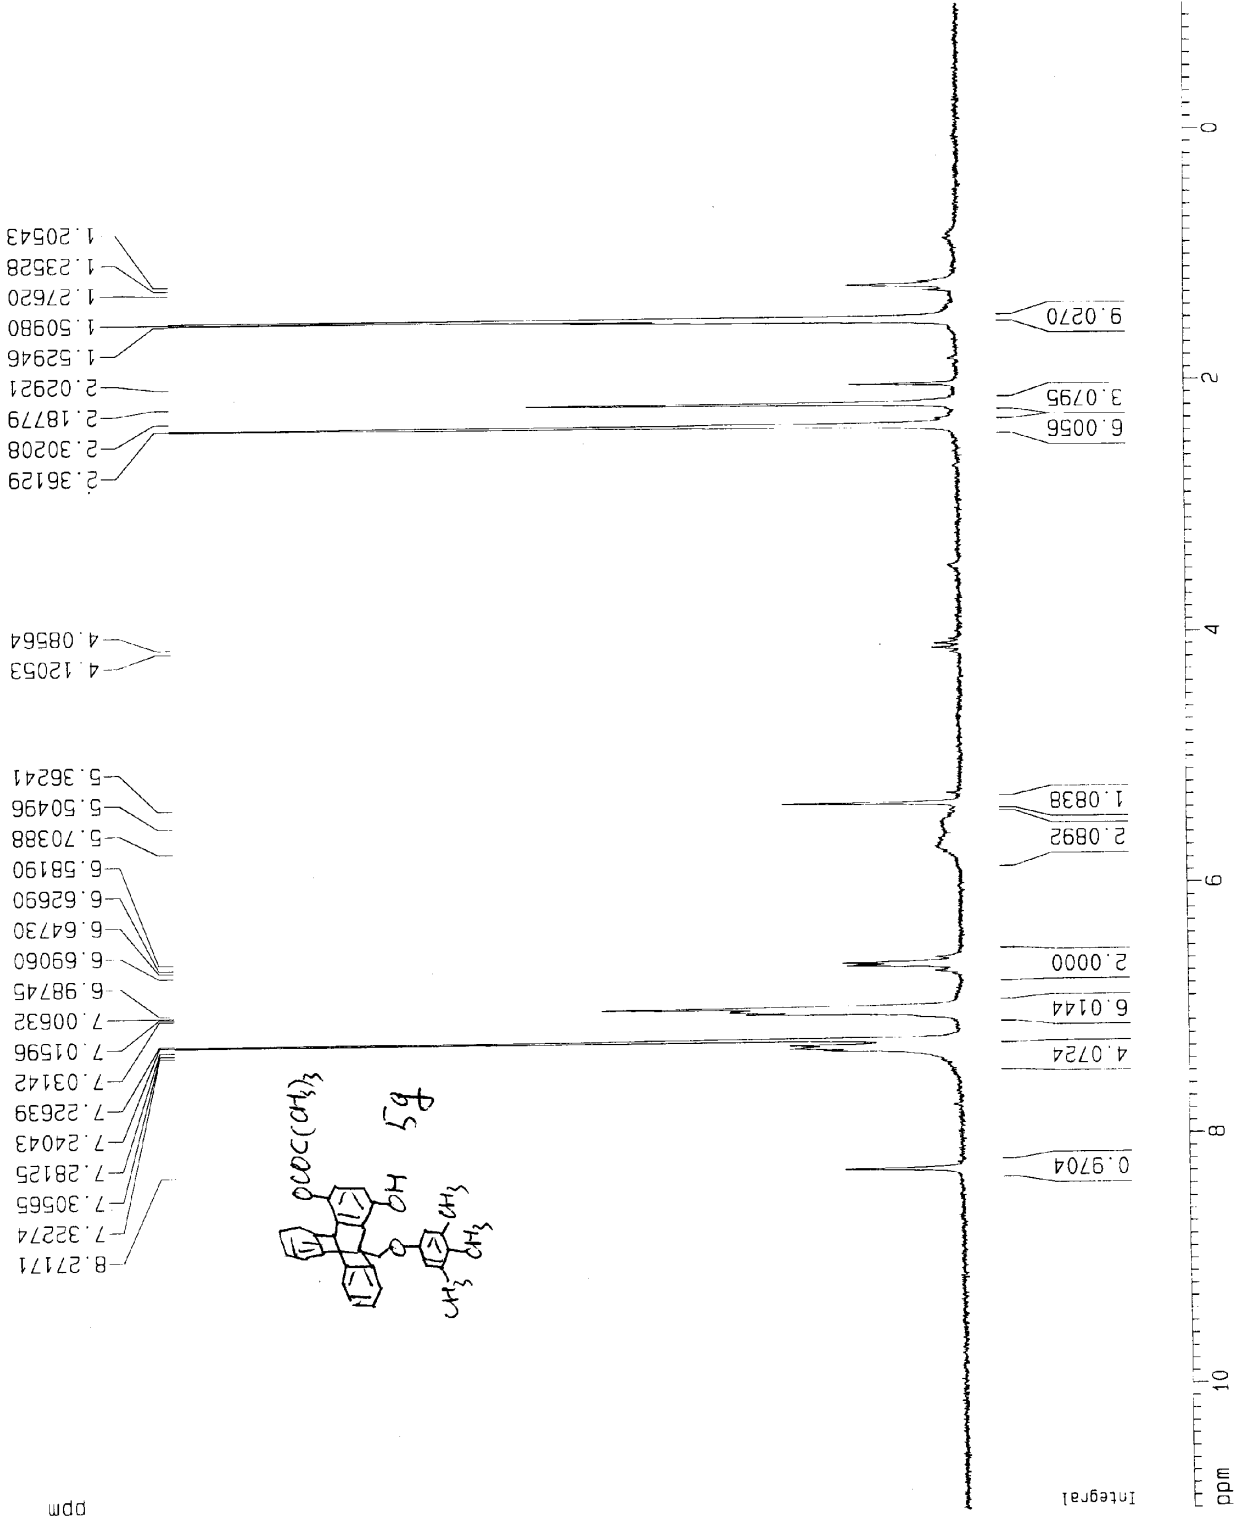

ppm

Integral

Current Data Parameters  
 NAME tetrametbu  
 EXPNO 1  
 PROCNO 1

F2 - Acquisition Parameters  
 Date\_ 20060310  
 Time 9.25  
 INSTRUM spect  
 PROBHD 5 mm Multinu  
 PULPROG zg30  
 TD 32768  
 SOLVENT CDC13  
 NS 16  
 DS 2  
 SWH 6188.119 Hz  
 FIDRES 0.188846 Hz  
 AQ 2.6477044 sec  
 RG 912.3  
 DW 80.800 usec  
 DE 6.00 usec  
 TE 300.0 K  
 D1 1.0000000 sec  
 P1 14.10 usec  
 SFO1 300.1318534 MHz  
 MUC1 1H  
 PL1 3.00 dB

F2 - Processing parameters  
 SI 16384  
 SF 300.1300125 MHz  
 WDW EM  
 SSB 0  
 LB 0.30 Hz  
 GB 0  
 PC 1.00

1D NMR plot parameters  
 CX 20.00 cm  
 FLP 9.474 ppm  
 F1 2843.53 Hz  
 F2P 1.326 ppm  
 F2 397.94 Hz  
 PPMCM 0.40742 ppm/cm  
 HZCM 122.27941 Hz/cm

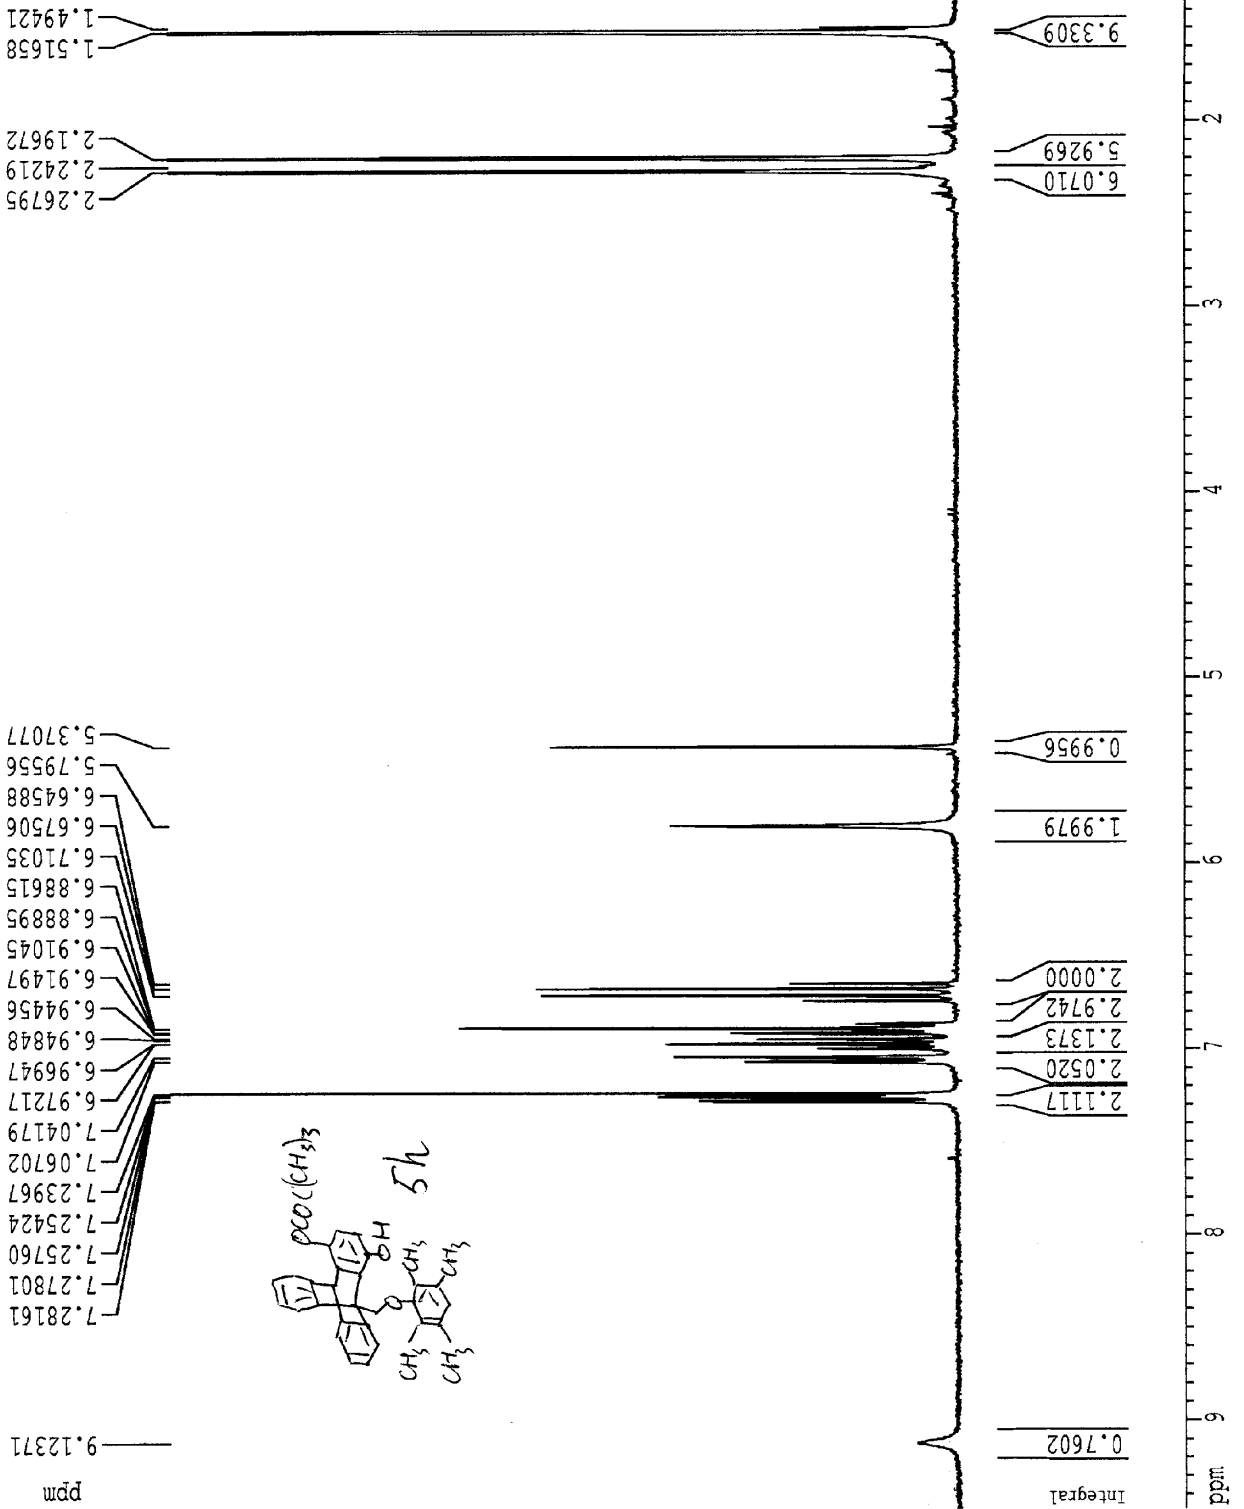

Current Data Parameters  
 NAME dimeotbuoh4  
 EXPNO 4  
 PROCNO 1

F2 - Acquisition Parameters  
 Date\_ 20060105  
 Time 17.19

INSTRUM spect  
 PROBED 5 mm Multinu  
 PULPROG zg30  
 TD 32768  
 SOLVENT CDCl3  
 NS 16  
 DS 2  
 SWH 6188.119 Hz  
 FIDRES 0.188846 Hz  
 AQ 2.6477044 sec  
 RG 724.1  
 DW 80.800 usec  
 DE 6.00 usec  
 TE 300.0 K  
 D1 1.0000000 sec  
 P1 14.10 usec  
 SFO1 300.1318534 MHz  
 NUC1 1H  
 PL1 3.00 dB

F2 - Processing parameters  
 SI 16384  
 SF 300.1300106 MHz  
 WDW EM  
 SSB 0  
 LB 0.30 Hz  
 GB 0  
 PC 1.00

1D NMR plot parameters  
 CX 20.00 cm  
 F1P 11.000 ppm  
 F1 3301.43 Hz  
 F2P -1.000 ppm  
 F2 -300.13 Hz  
 PPMCM 0.60000 ppm/cm  
 HZCM 180.07800 Hz/cm

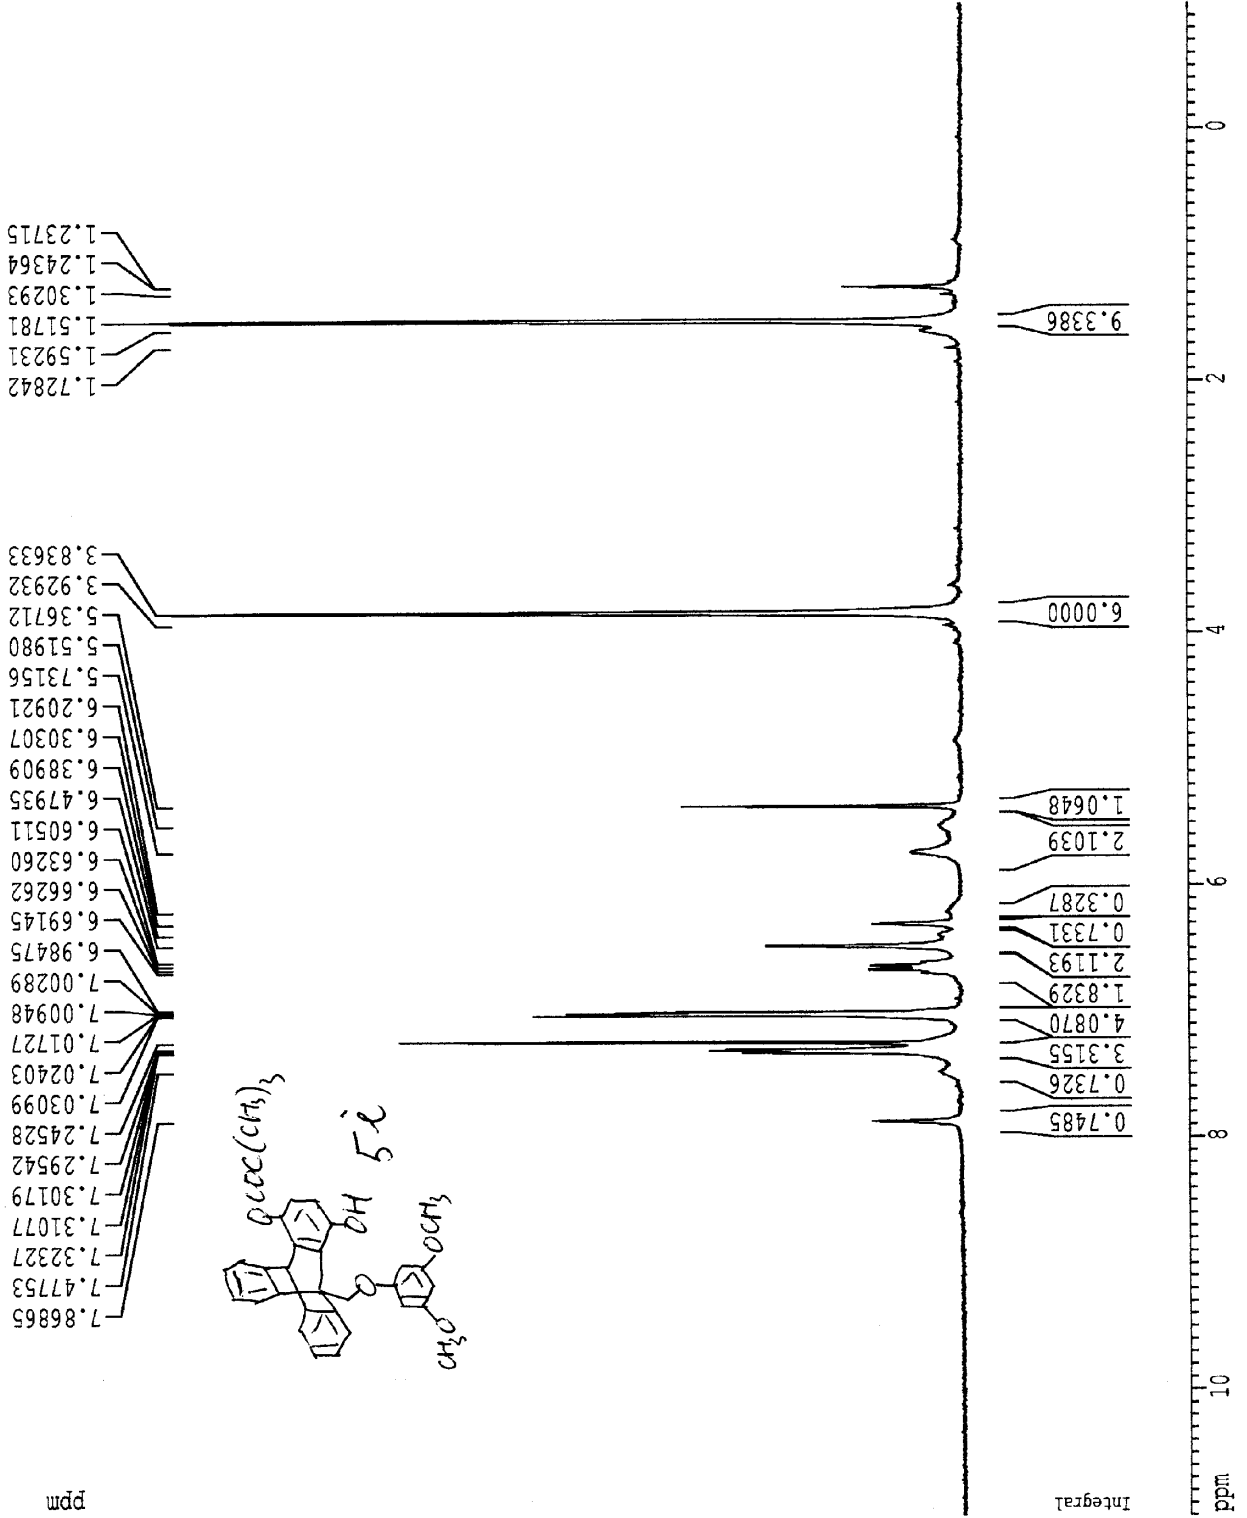

Current Data Parameters

NAME dimeamino5fben  
 EXPNO 1  
 PROCNO 1

F2 - Acquisition Parameters

Date\_ 20051122  
 Time 15.17  
 INSTRUM spect  
 PROBED 5 mm Multinu  
 PULPROG zg30  
 TD 32768  
 SOLVENT CDCl3  
 NS 16  
 DS 2  
 SWH 6188.119 Hz  
 FIDRES 0.188846 Hz  
 AQ 2.6477044 sec  
 RG 512  
 DW 80.800 usec  
 DE 6.00 usec  
 TE 300.0 K  
 D1 1.00000000 sec  
 P1 14.10 usec  
 SFO1 300.1318534 MHz  
 NUC1 1H  
 PL1 3.00 dB

F2 - Processing parameters

SI 16384  
 SF 300.1300121 MHz  
 WDW EM  
 SSB 0  
 LB 0.30 Hz  
 GB 0  
 PC 1.00

1D NMR plot parameters

CX 20.00 cm  
 F1P 7.859 ppm  
 F1 2358.81 Hz  
 F2P 1.354 ppm  
 F2 406.35 Hz  
 PPMCM 0.32527 ppm/cm  
 HZCM 97.62309 Hz/cm

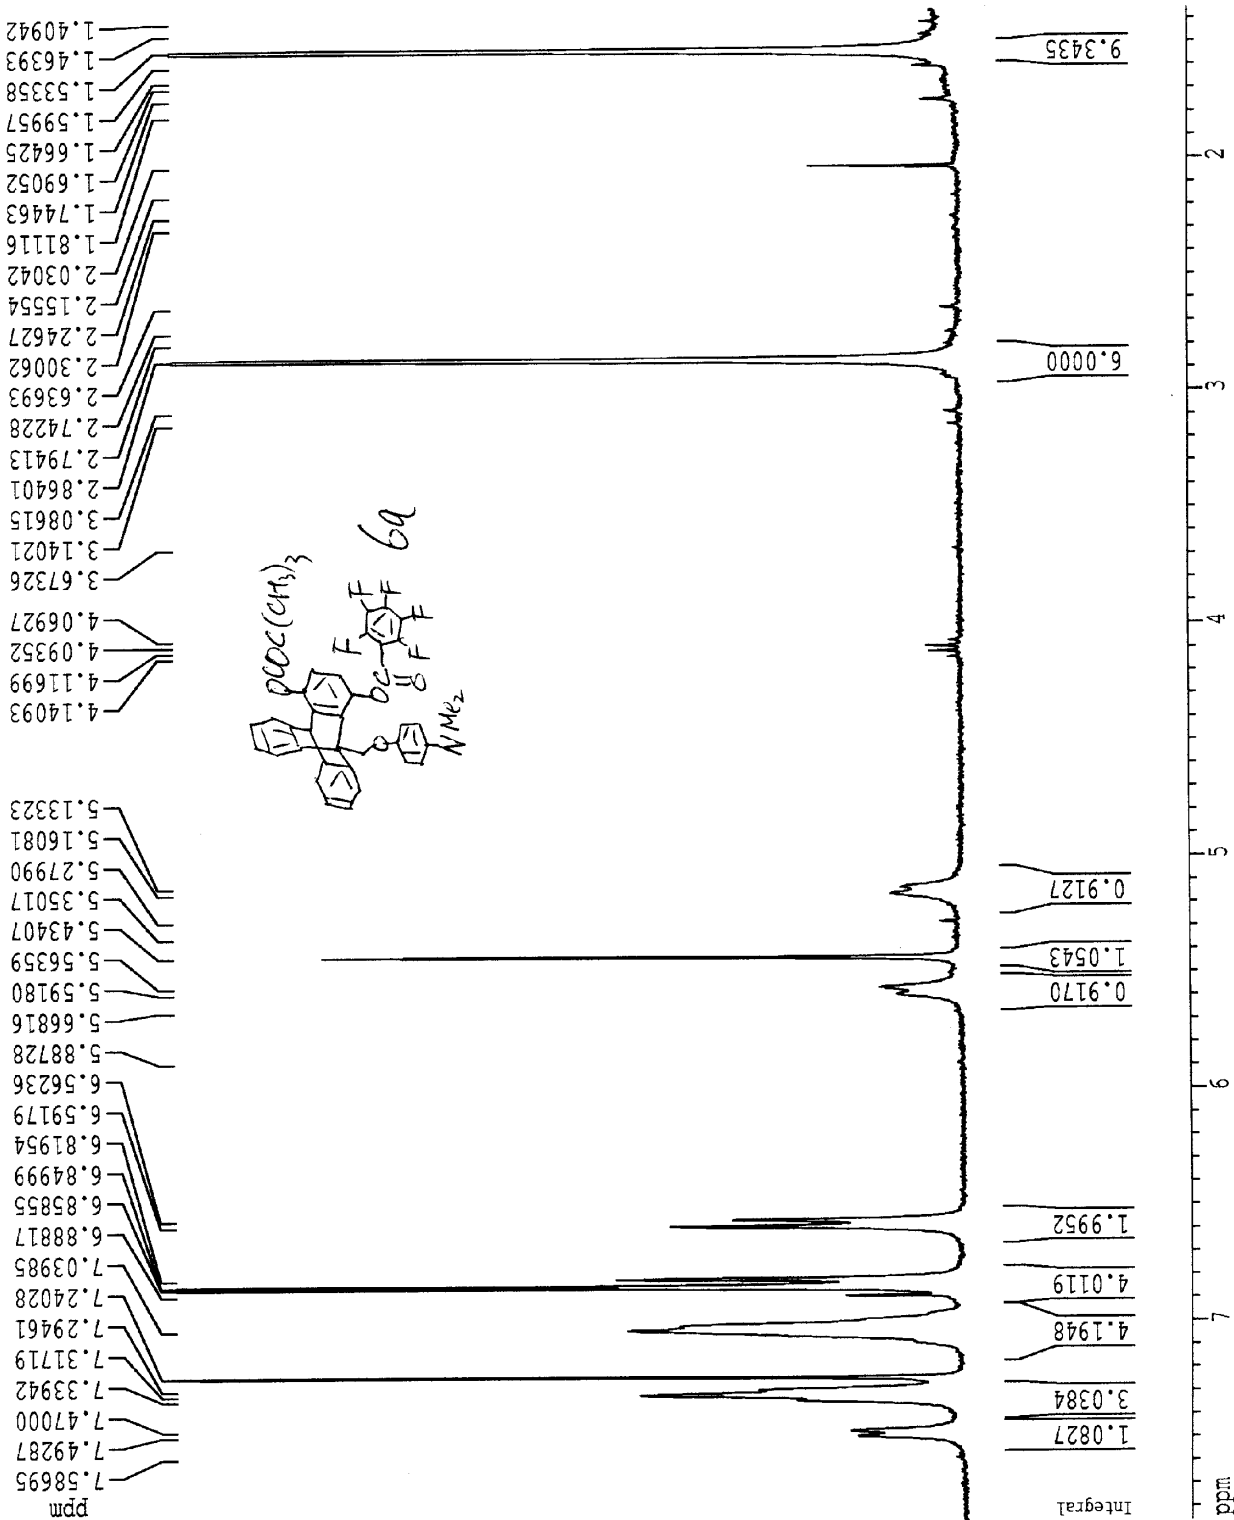

Current Data Parameters  
 NAME nmphenol4f2  
 EXPNO 1  
 PROCNO 1

F2 - Acquisition Parameters  
 Date\_ 20051214  
 Time 12:33  
 INSTRUM spect  
 PROBED 5 mm Multinu  
 PULPROG zg30  
 TD 32768  
 SOLVENT CDCl3  
 NS 16  
 DS 2  
 SWH 6188.119 Hz  
 FIDRES 0.188846 Hz  
 AQ 2.6477044 sec  
 RG 512  
 DW 80.800 usec  
 DE 6.00 usec  
 TE 300.0 K  
 D1 1.0000000 sec  
 F1 14.10 usec  
 SFO1 300.1318534 MHz  
 NUC1 1H  
 PL1 3.00 dB

F2 - Processing parameters  
 SI 16384  
 SF 300.1300113 MHz  
 WDW EM  
 SSB 0  
 LB 0.30 Hz  
 GB 0  
 PC 1.00

1D NMR plot parameters  
 CX 20.00 cm  
 F1P 11.000 ppm  
 F1 3301.43 Hz  
 F2P -1.000 ppm  
 F2 -300.13 Hz  
 PPMCM 0.60000 ppm/cm  
 HZCM 180.07800 Hz/cm

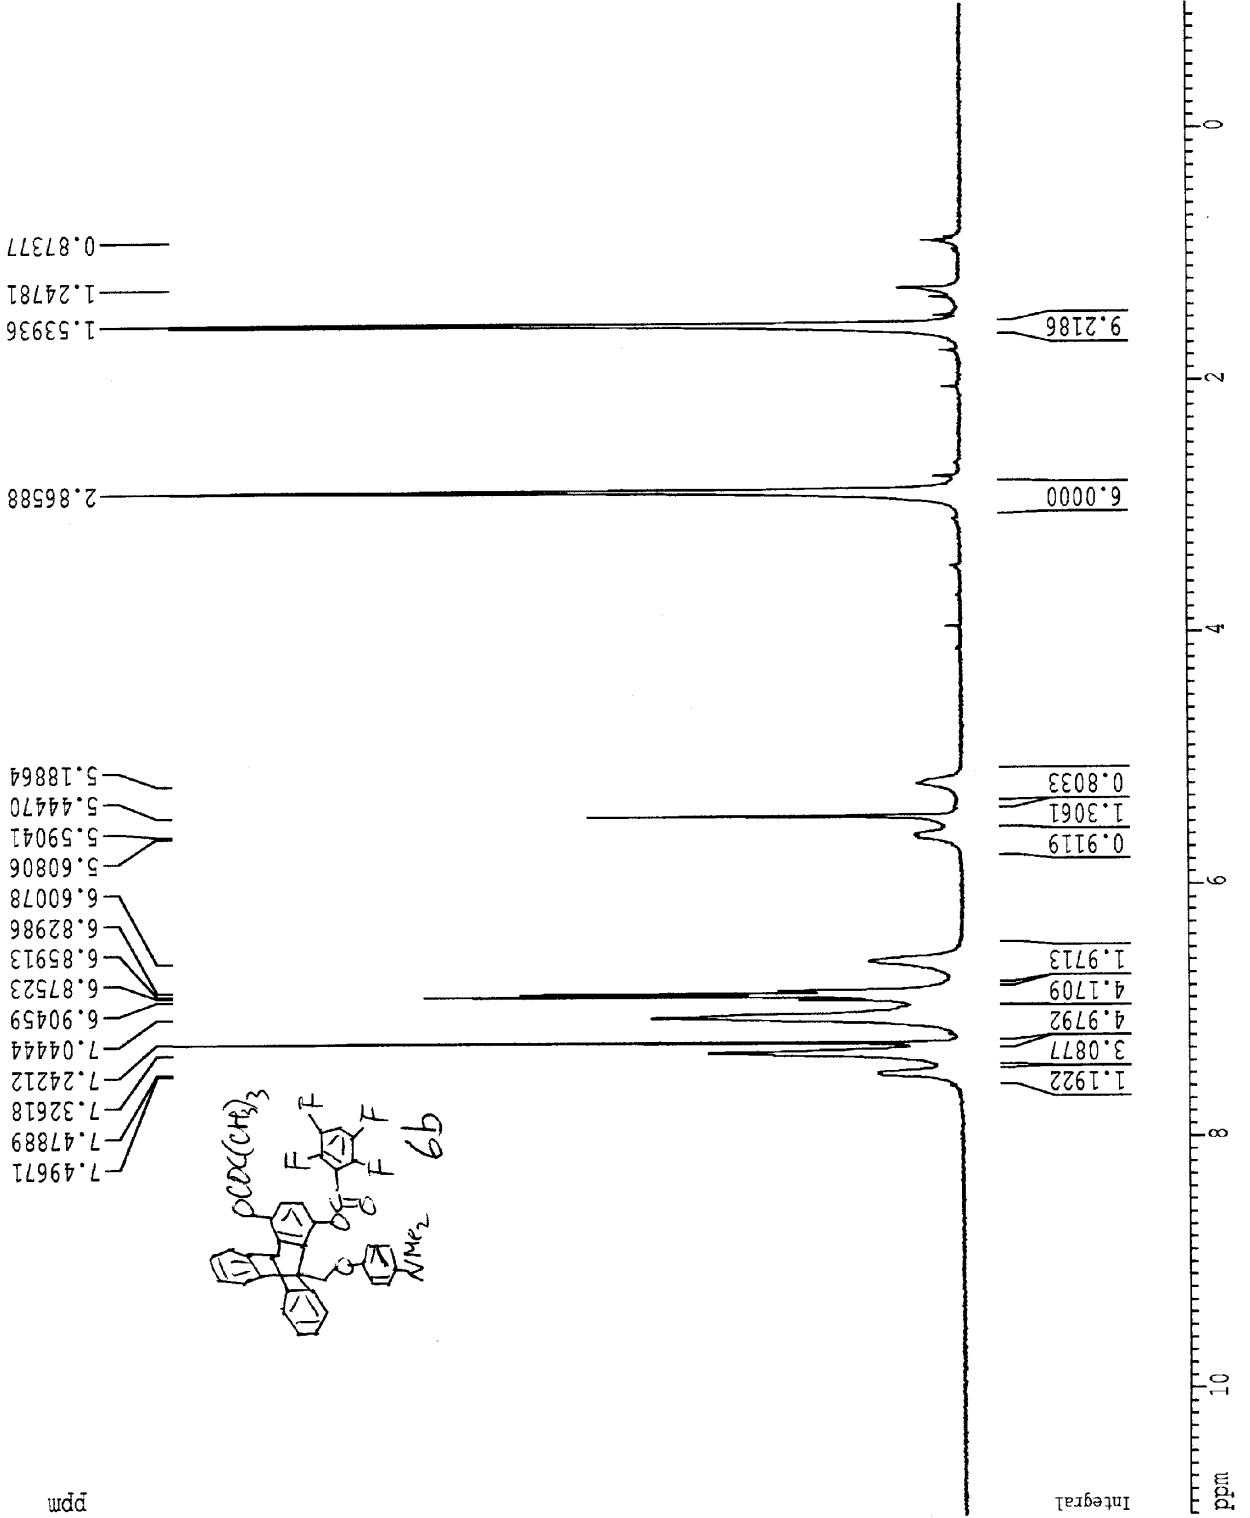

ppm

Integral

ppm

Current Data Parameters

NAME nme2f3  
 EXPNO 2  
 PROCNO 1

F2 - Acquisition Parameters

Date\_ 20051208  
 Time 15.25  
 INSTRUM spect  
 PROBED 5 mm Multinu  
 PULPROG zg30  
 TD 32768  
 SOLVENT CDCl3  
 NS 16  
 DS 2  
 SWH 6188.119 Hz  
 FIDRES 0.188846 Hz  
 AQ 2.6477044 sec  
 RG 645.1  
 DW 80.800 usec  
 DE 6.00 usec  
 TE 300.0 K  
 D1 1.00000000 sec  
 F1 14.10 usec  
 SFO1 300.1318534 MHz  
 NUC1 1H  
 PL1 3.00 dB

F2 - Processing parameters

SI 16384  
 SF 300.1300129 MHz  
 WDW EM  
 SSB 0  
 LB 0.30 Hz  
 GB 0  
 PC 1.00

1D NMR plot parameters

CX 20.00 cm  
 FIP 8.099 ppm  
 F1 2430.66 Hz  
 F2P 0.422 ppm  
 F2 126.51 Hz  
 PPMCM 0.38386 ppm/cm  
 HZCM 115.20766 Hz/cm

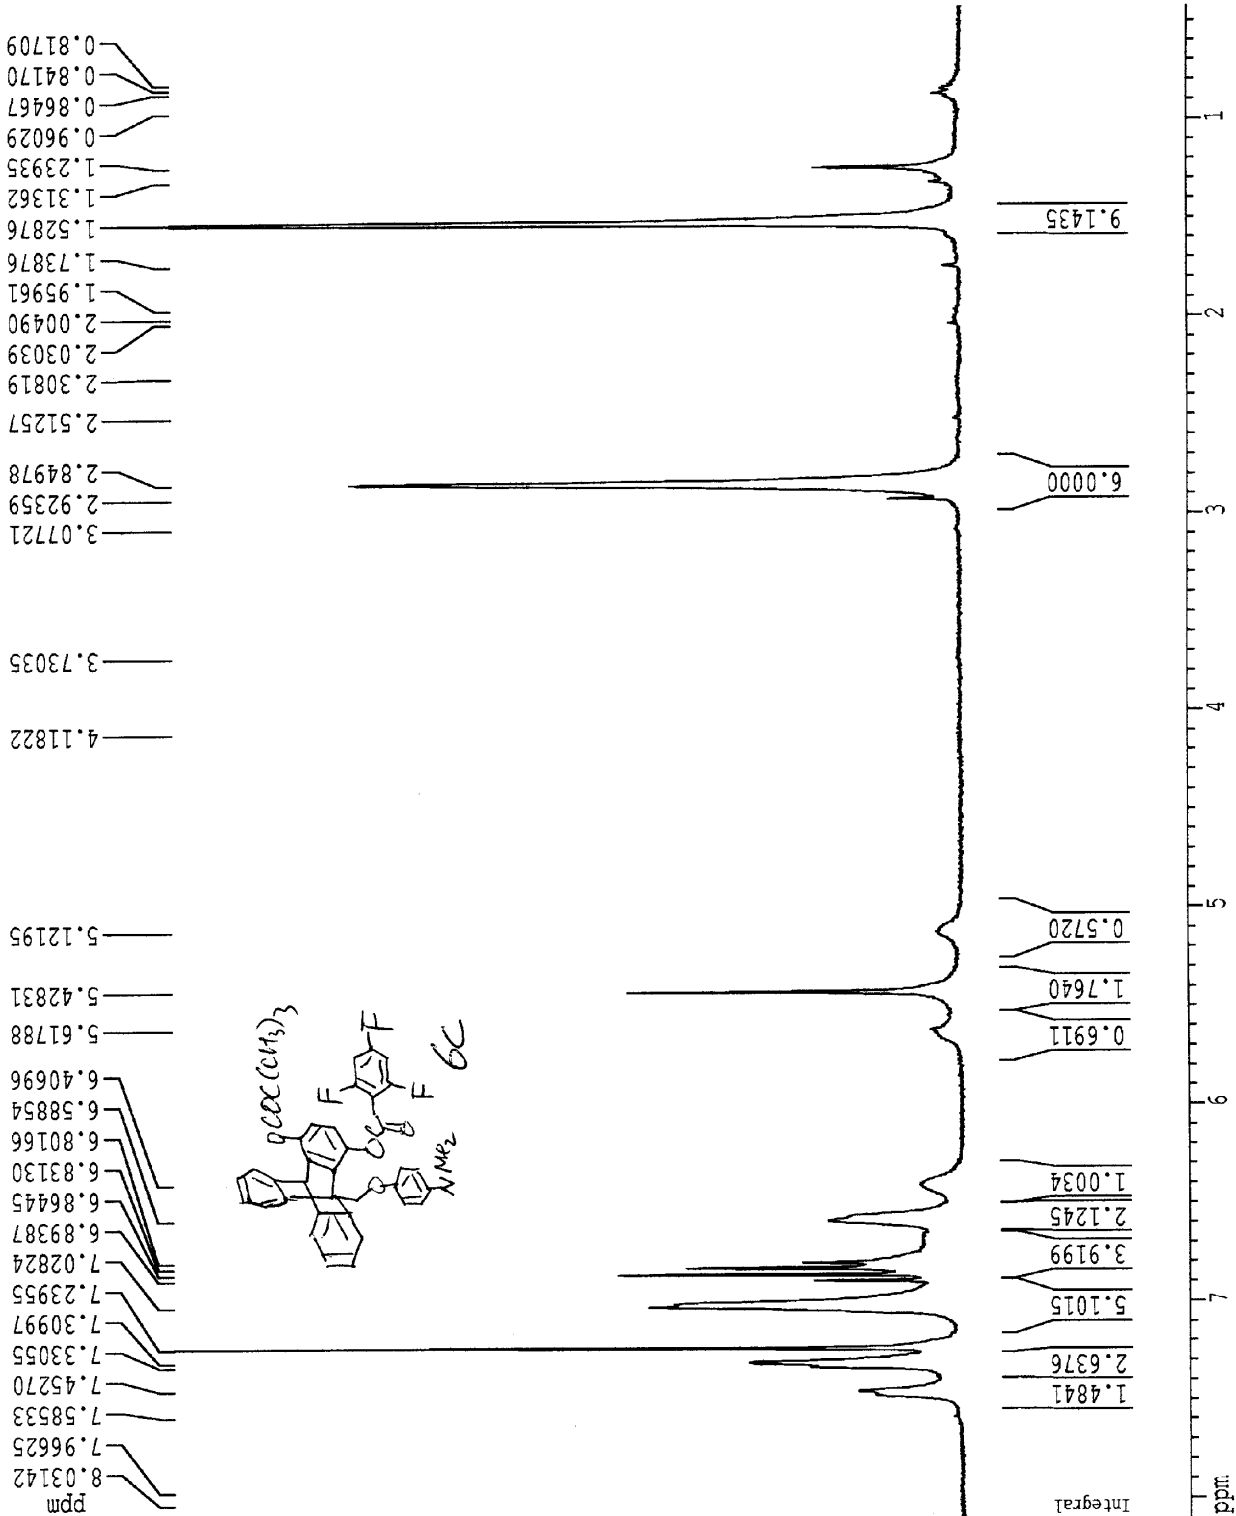

Current Data Parameters

NAME nme2phe2f  
 EXPNO 2  
 PROCNO 1

F2 - Acquisition Parameters

Date\_ 20051209  
 Time 15.30  
 INSTRUM spect  
 PROBHD 5 mm Multinu  
 PULPROG zg30  
 TD 32768  
 SOLVENT CDC13  
 NS 16  
 DS 2  
 SWH 6188.119 Hz  
 FIDRES 0.188846 Hz  
 AQ 2.6477044 sec  
 RG 256  
 DW 80.800 usec  
 DE 6.00 usec  
 TE 300.0 K  
 D1 1.0000000 sec  
 F1 14.10 usec  
 SF01 300.1318534 MHz  
 NUC1 1H  
 PL1 3.00 dB

F2 - Processing parameters

SI 16384  
 SF 300.1300121 MHz  
 WDW EM  
 SSB 0  
 LB 0.30 Hz  
 GB 0  
 FC 1.00

1D NMR plot parameters

CX 20.00 cm  
 F1P 8.525 ppm  
 F1 2558.49 Hz  
 F2P 1.042 ppm  
 F2 312.63 Hz  
 PPMCM 0.37415 ppm/cm  
 HZCM 112.29282 Hz/cm

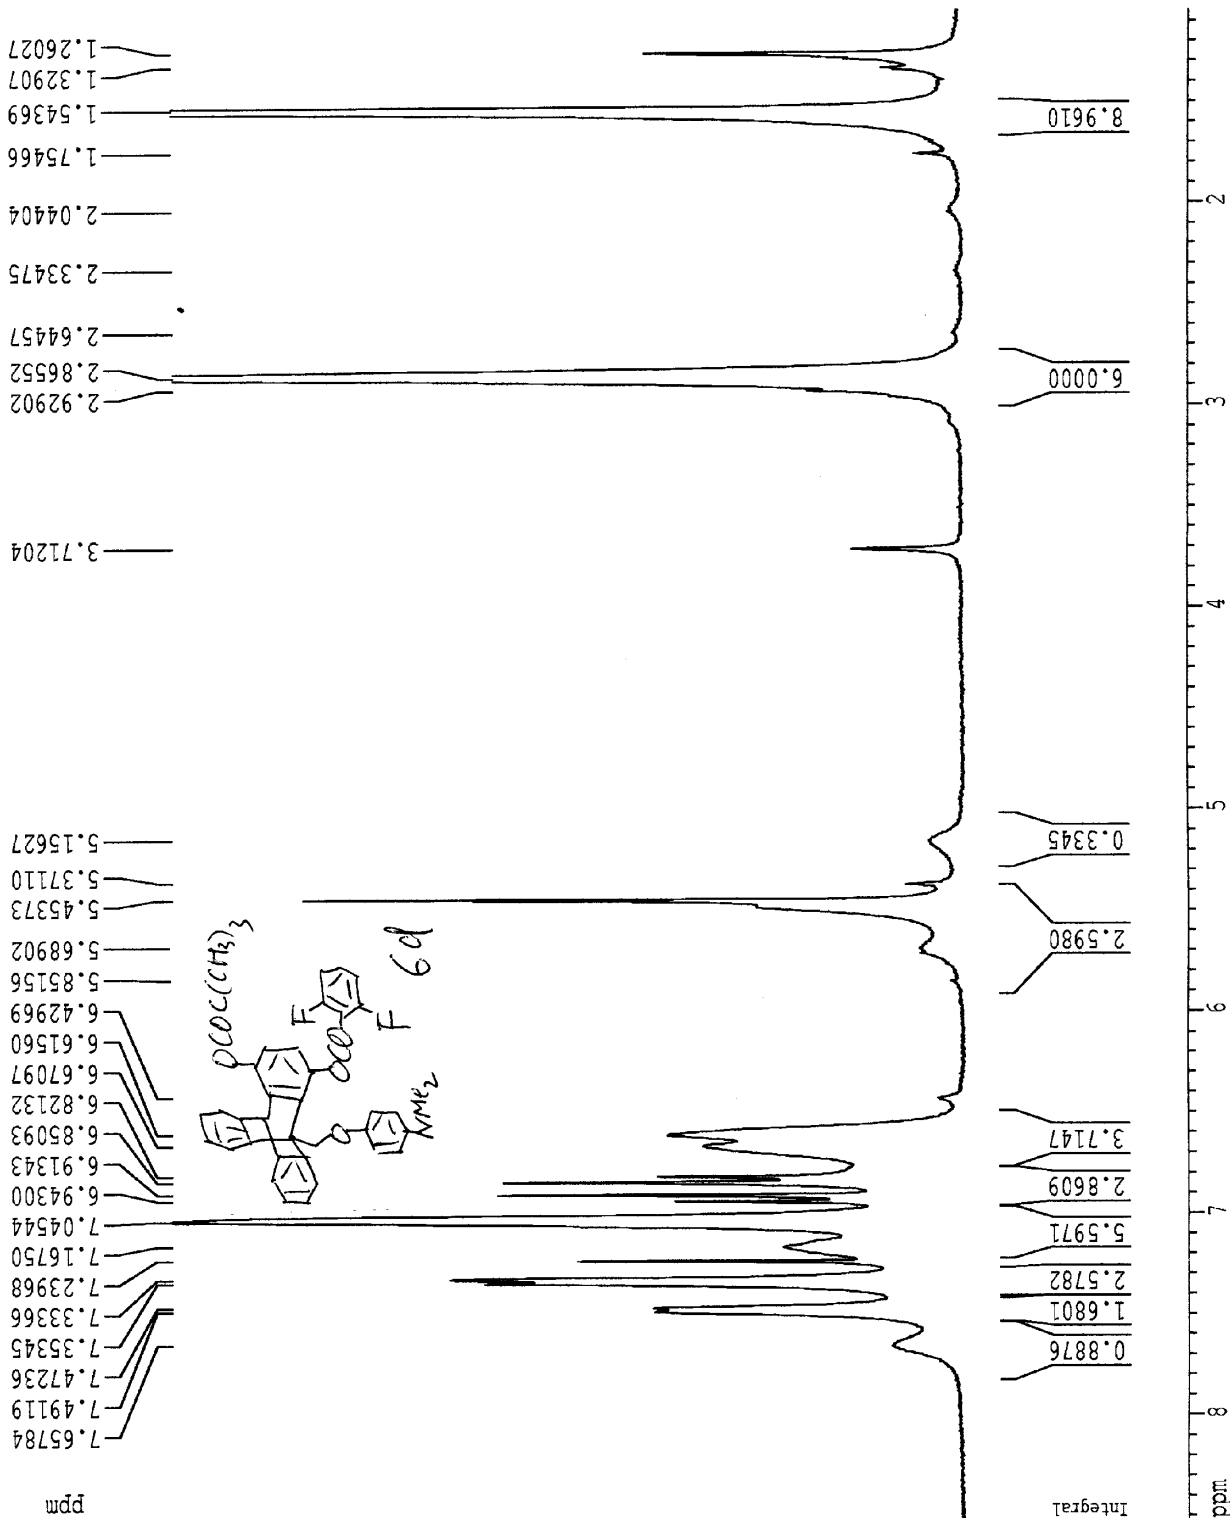

Current Data Parameters

NAME: imezf  
 EXPNO: 2  
 PROCNO: 1

F2 - Acquisition Parameters

Date\_: 20051208  
 Time: 15.46  
 INSTRUM: spect  
 PROBED: 5 mm Multinu  
 PULPROG: zg30  
 TD: 32768  
 SOLVENT: CDCl3  
 NS: 64  
 DS: 2  
 SWE: 6188.119 Hz  
 FIDRES: 0.188846 Hz  
 AQ: 2.6477044 sec  
 RG: 1024  
 DW: 80.800 usec  
 DE: 6.00 usec  
 TE: 300.0 K  
 D1: 1.00000000 sec  
 F1: 14.10 usec  
 SF01: 300.1318534 MHz  
 NUC1: <sup>1</sup>H  
 PL1: 3.00 dB

F2 - Processing parameters

SI: 16384  
 SF: 300.1300125 MHz  
 WDW: EM  
 SSB: 0  
 LB: 0.30 Hz  
 GB: 0  
 PC: 1.00

1D NMR plot parameters

CX: 20.00 cm  
 F1P: 9.036 ppm  
 F1: 2712.03 Hz  
 F2P: 0.860 ppm  
 F2: 258.01 Hz  
 PPMCM: 0.40883 ppm/cm  
 HZCM: 122.70084 Hz/cm

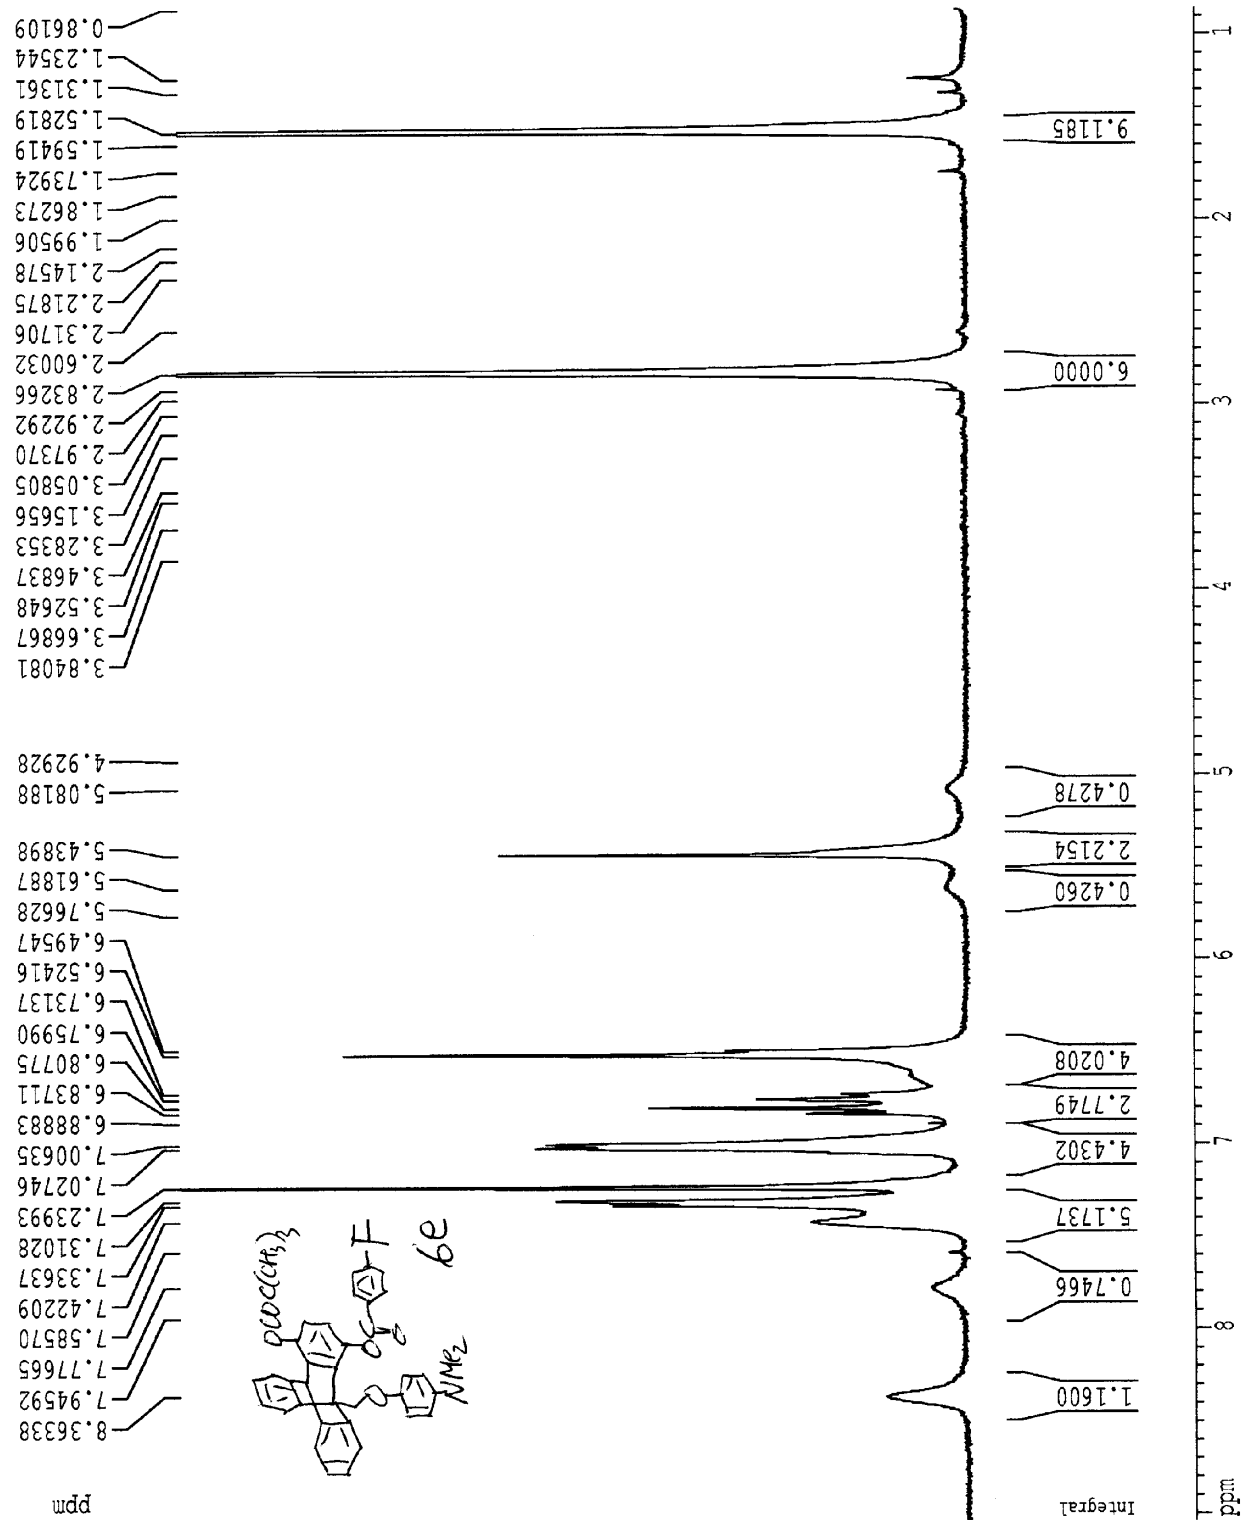



Current Data Parameters  
 NAME nme-hben\_20  
 EXPNO 1  
 PROCNO 1

F2 - Acquisition Parameters

Date\_ 20051209  
 Time 18.48  
 INSTRUM spect  
 PROBHD 5 mm Multinu  
 PULPROG zg30  
 TD 32768  
 SOLVENT CDCl3  
 NS 16  
 DS 2  
 SWH 6188.119 Hz  
 FIDRES 0.188846 Hz  
 AQ 2.6477044 sec  
 RG 812.7  
 DW 80.800 usec  
 DE 6.00 usec  
 TE 300.0 K  
 D1 1.0000000 sec  
 P1 14.10 usec  
 SFO1 300.1318534 MHz  
 NUC1 1H  
 PL1 3.00 dB

F2 - Processing parameters

SI 16384  
 SF 300.1300125 MHz  
 WDW EM  
 SSB 0  
 LB 0.30 Hz  
 GB 0  
 PC 1.00

1D NMR plot parameters

CX 20.00 cm  
 F1P 8.932 ppm  
 F1 2680.81 Hz  
 F2P 0.152 ppm  
 F2 45.71 Hz  
 PPMCM 0.43899 ppm/cm  
 HZCM 131.75510 Hz/cm

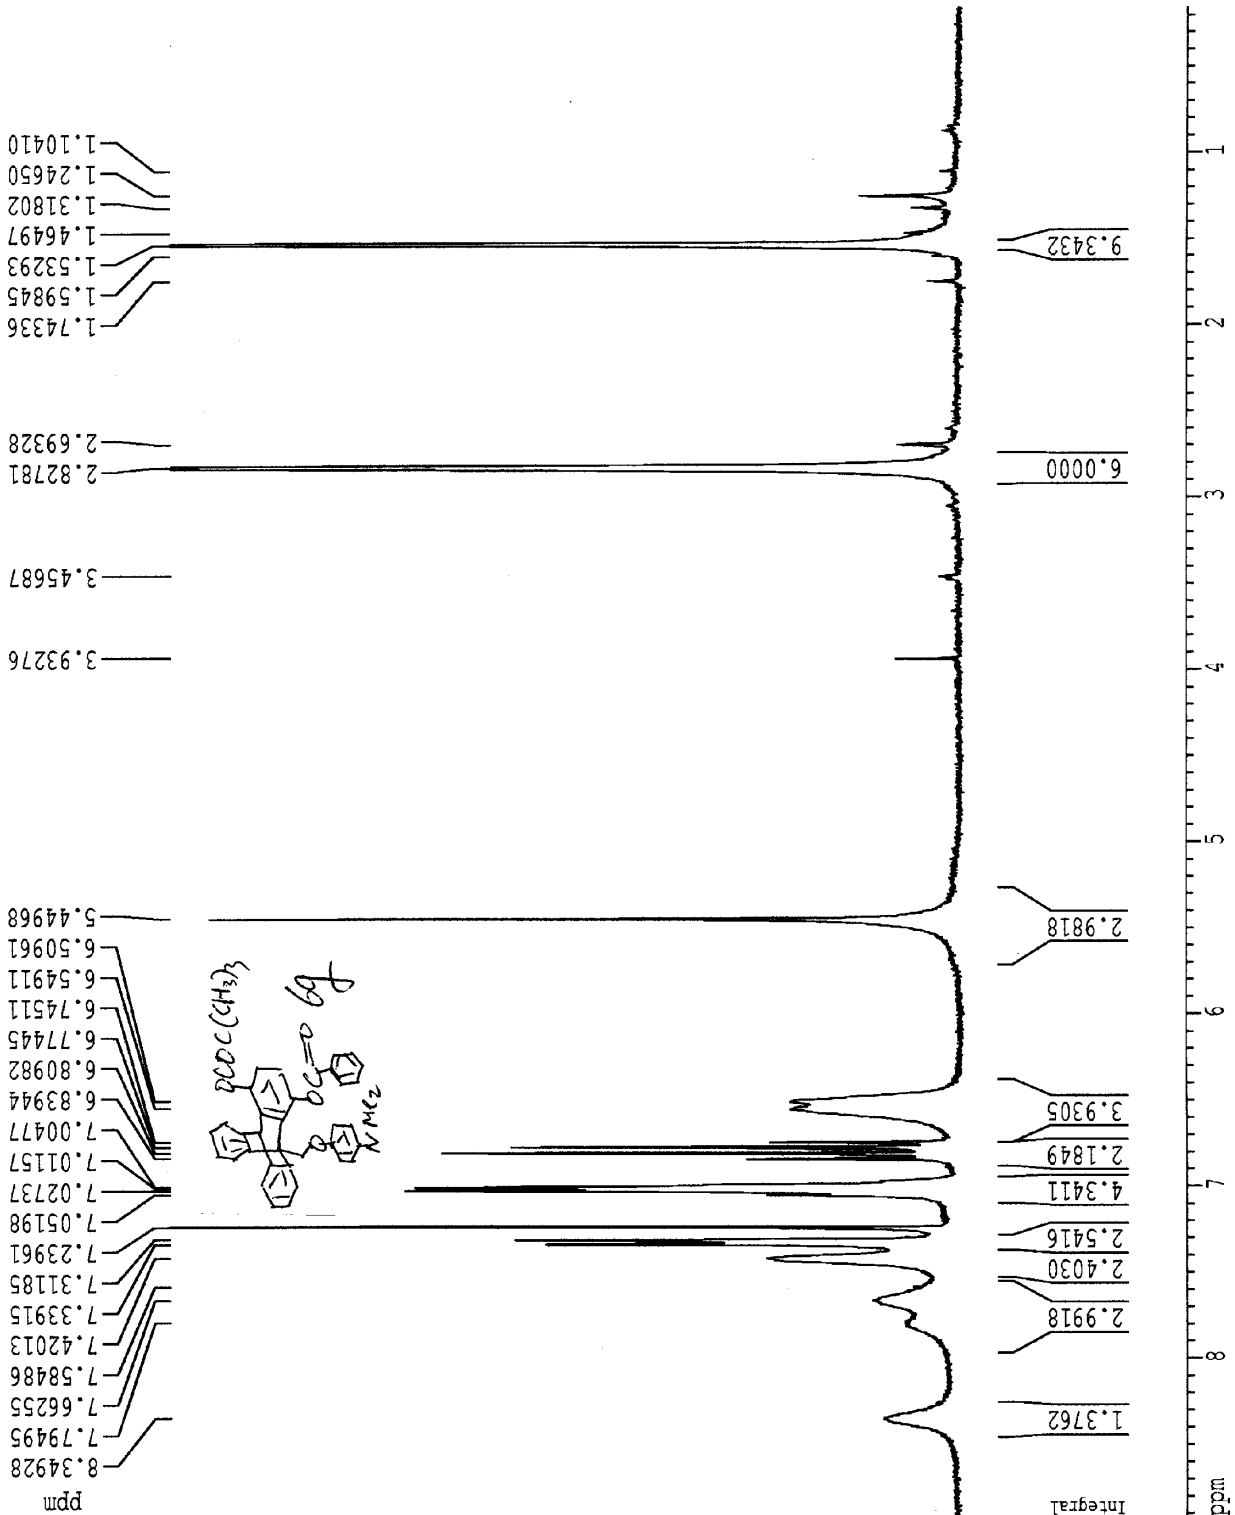

Current Data Parameters  
 NAME phenol5f3  
 EXPNO 1  
 PROCNO 1

F2 - Acquisition Parameters  
 Date\_ 20060605  
 Time 15.30  
 INSTRUM spect  
 PROBHD 5 mm Multinu  
 PULPROG zg30  
 TD 32768  
 SOLVENT CDCl3  
 NS 25  
 DS 2  
 SWH 6188.119 Hz  
 FIDRES 0.188846 Hz  
 AQ 2.6477044 sec  
 RG 203.2  
 DM 80.900 usec  
 DE 6.00 usec  
 TE 300.0 K  
 D1 1.00000000 sec  
 P1 14.10 usec  
 SF01 300.1318534 MHz  
 NUC1 1H  
 PL1 3.00 dB

F2 - Processing parameters  
 SI 16384  
 SF 300.1300117 MHz  
 WDW EM  
 SSB 0  
 LB 0.30 Hz  
 GB 0  
 PC 1.00

1D NMR plot parameters  
 CX 20.00 cm  
 F1P 11.000 ppm  
 F1 3301.43 Hz  
 F2P -1.000 ppm  
 F2 -300.13 Hz  
 PPMCM 0.60000 ppm/cm  
 HZCM 180.07800 Hz/cm

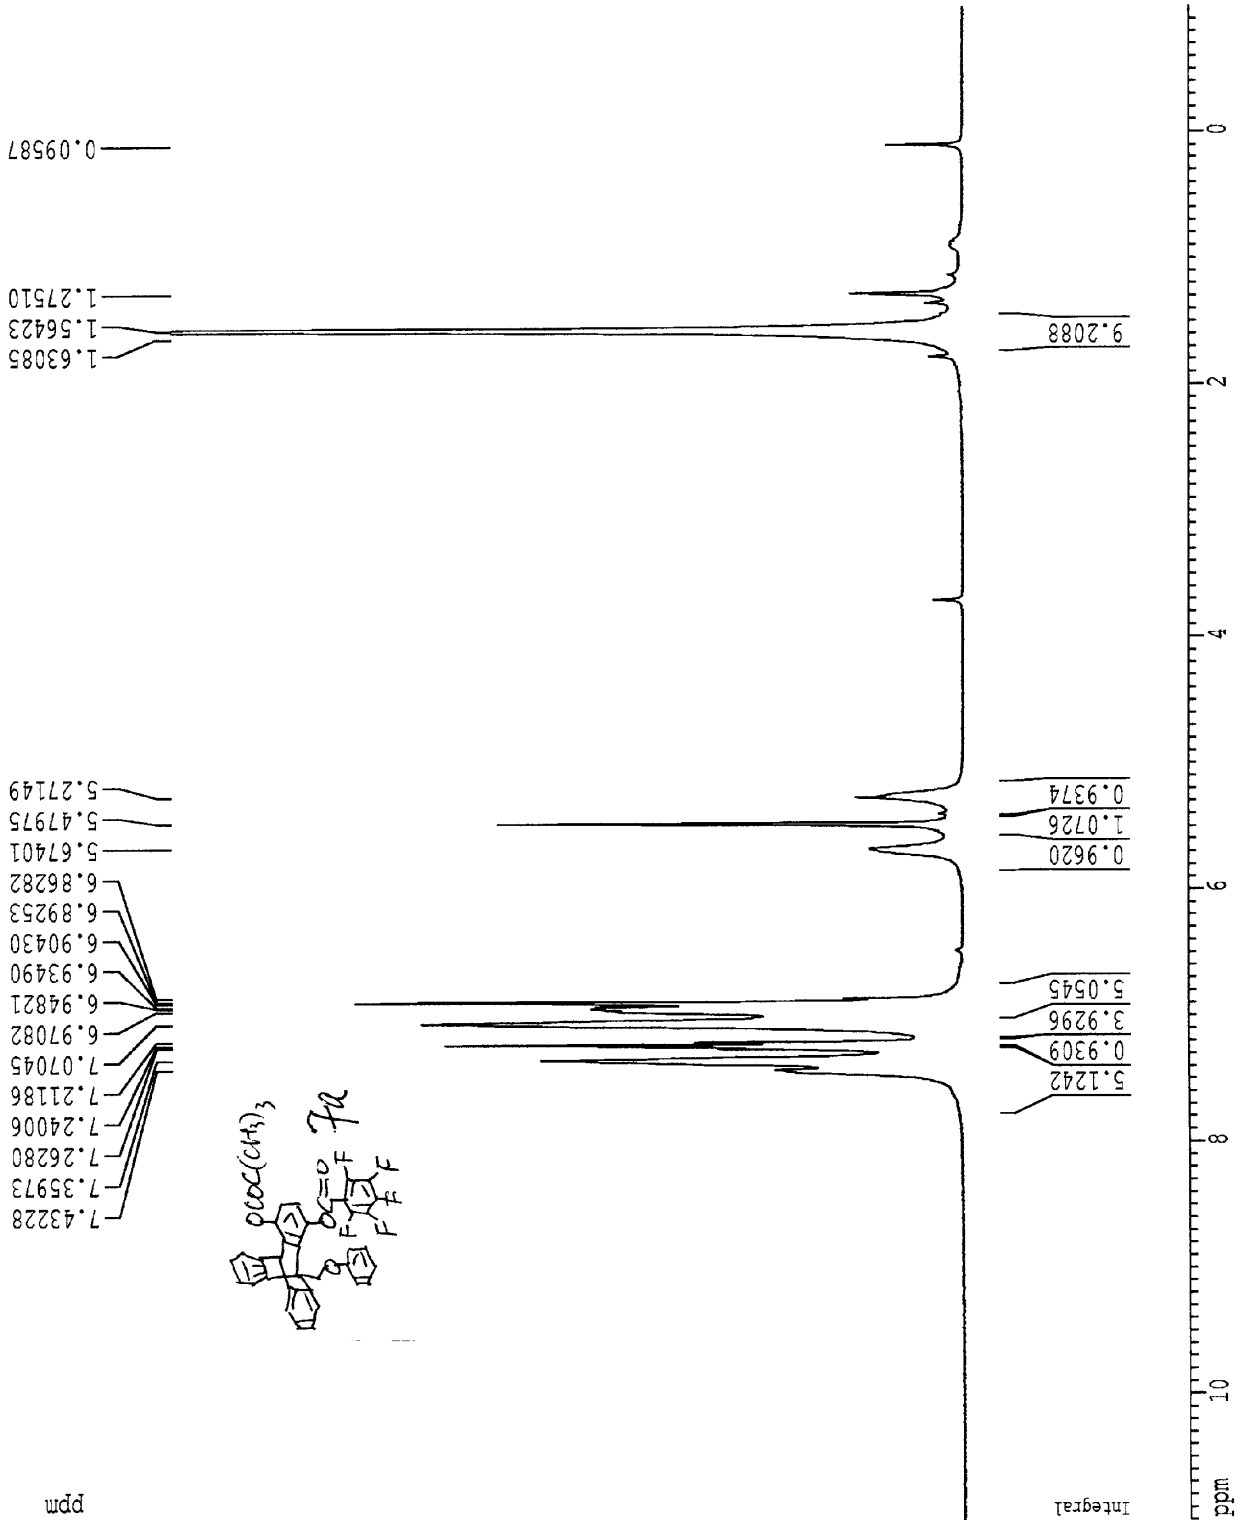

Current Data Parameters

NAME hphenoltripf  
 EXPNO 1  
 PROCNO 1

F2 - Acquisition Parameters

Date\_ 20051231  
 Time 11.42  
 INSTRUM spect  
 PROBHD 5 mm Multinu  
 PULPROG zg30  
 TD 32768  
 SOLVENT CDCl3  
 NS 16  
 DS 2  
 SWH 6188.119 Hz  
 FIDRES 0.188846 Hz  
 AQ 2.6477044 sec  
 RG 362  
 DW 80.800 usec  
 DE 6.00 usec  
 TE 300.0 K  
 D1 1.00000000 sec  
 F1 14.10 usec  
 SF01 300.1318534 MHz  
 NUC1 1H  
 PL1 3.00 dB

F2 - Processing parameters

SI 16384  
 SF 300.1300121 MHz  
 WDM EM  
 SSB 0  
 LB 0.30 Hz  
 GB 0  
 PC 1.00

1D NMR plot parameters

CX 20.00 cm  
 F1F 8.744 ppm  
 F1 2624.37 Hz  
 F2F 1.347 ppm  
 F2 404.37 Hz  
 PPMCM 0.36984 ppm/cm  
 HZCM 110.99999 Hz/cm

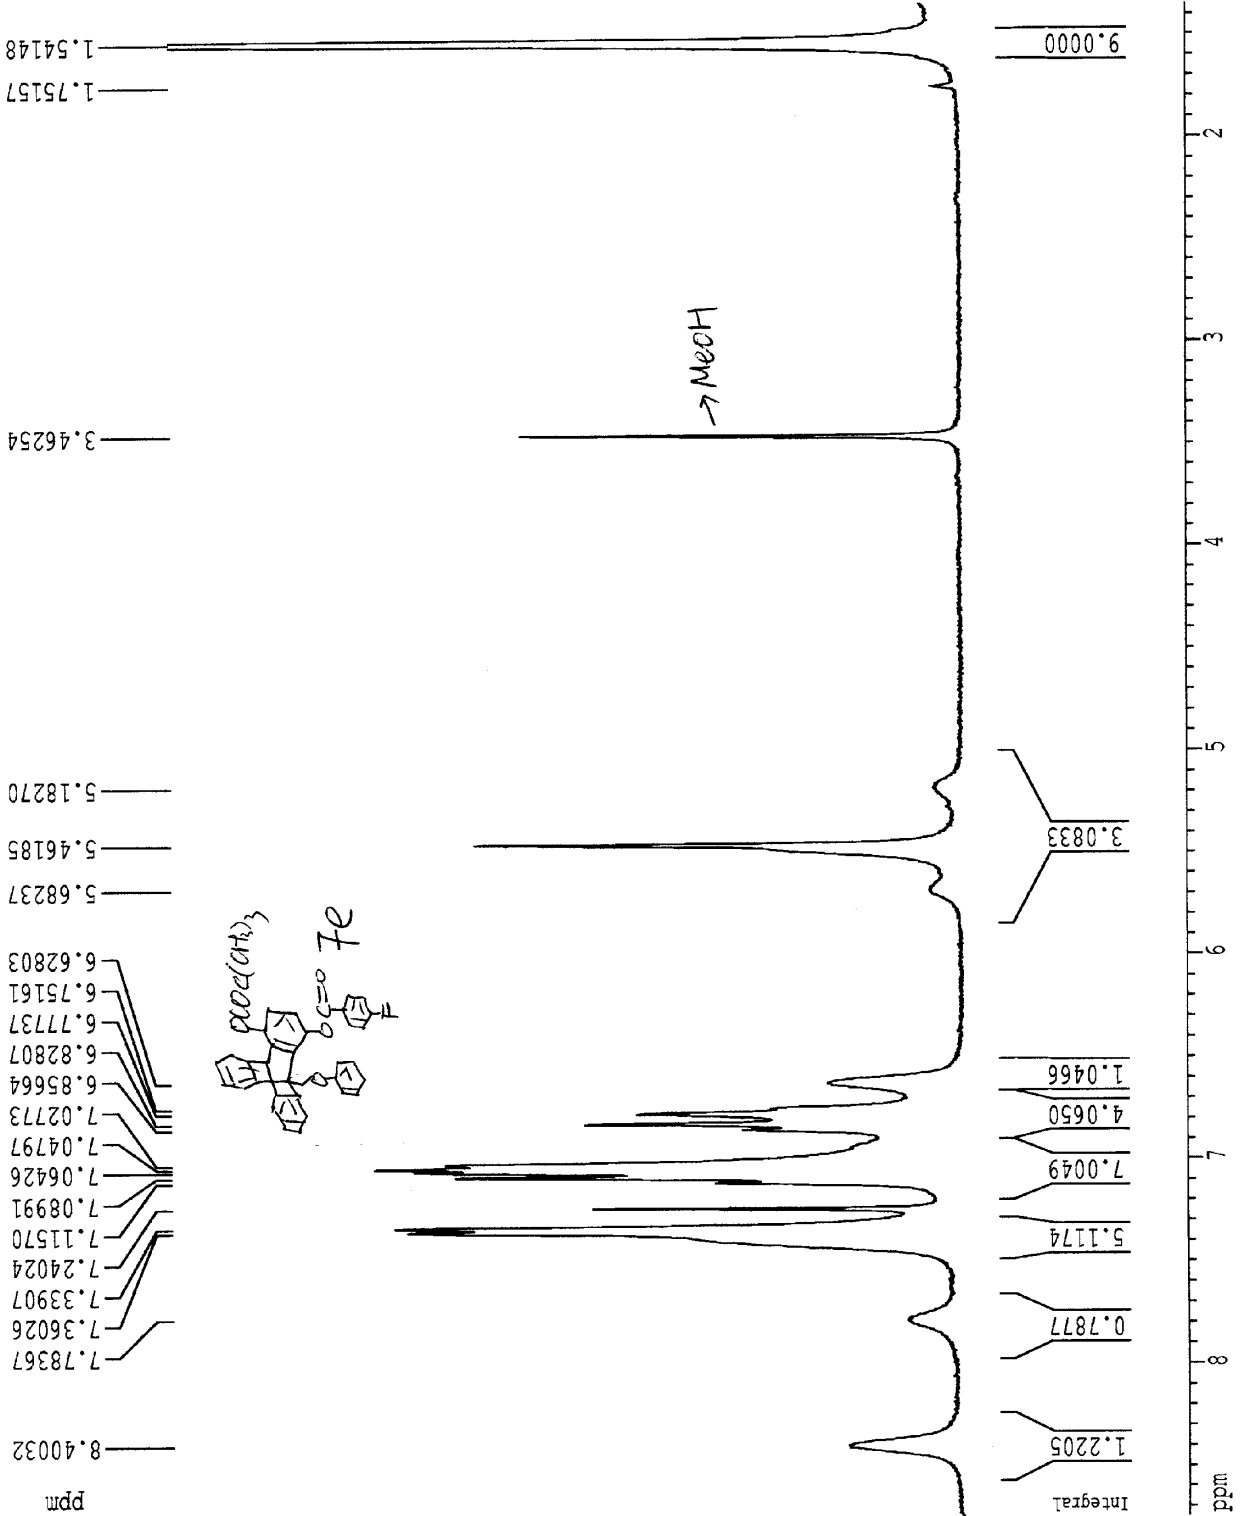

Current Data Parameters  
 NAME hphenolnitro  
 EXPNO 1  
 PROCNO 1

F2 - Acquisition Parameters  
 Date\_ 20051226  
 Time 10.27  
 INSTRUM spect  
 PROBHD 5 mm Multinu  
 PULPROG zg30  
 TD 32768  
 SOLVENT CDCl3  
 NS 16  
 DS 2  
 SWH 6188.119 Hz  
 FIDRES 0.188846 Hz  
 AQ 2.6477044 sec  
 RG 362  
 DW 80.800 usec  
 DE 6.00 usec  
 TE 300.0 K  
 D1 1.00000000 sec  
 P1 14.10 usec  
 SF01 300.1318534 MHz  
 NUC1 1H  
 PL1 3.00 dB

F2 - Processing parameters  
 SI 16384  
 SF 300.1300125 MHz  
 WDW EM  
 SSB 0  
 LB 0.30 Hz  
 GB 0  
 PC 1.00

1D NMR plot parameters  
 CX 20.00 cm  
 FL1 11.000 ppm  
 F1 3301.43 Hz  
 F2P -1.000 ppm  
 F2 -300.13 Hz  
 PPMCM 0.60000 ppm/cm  
 HZCM 180.07800 Hz/cm

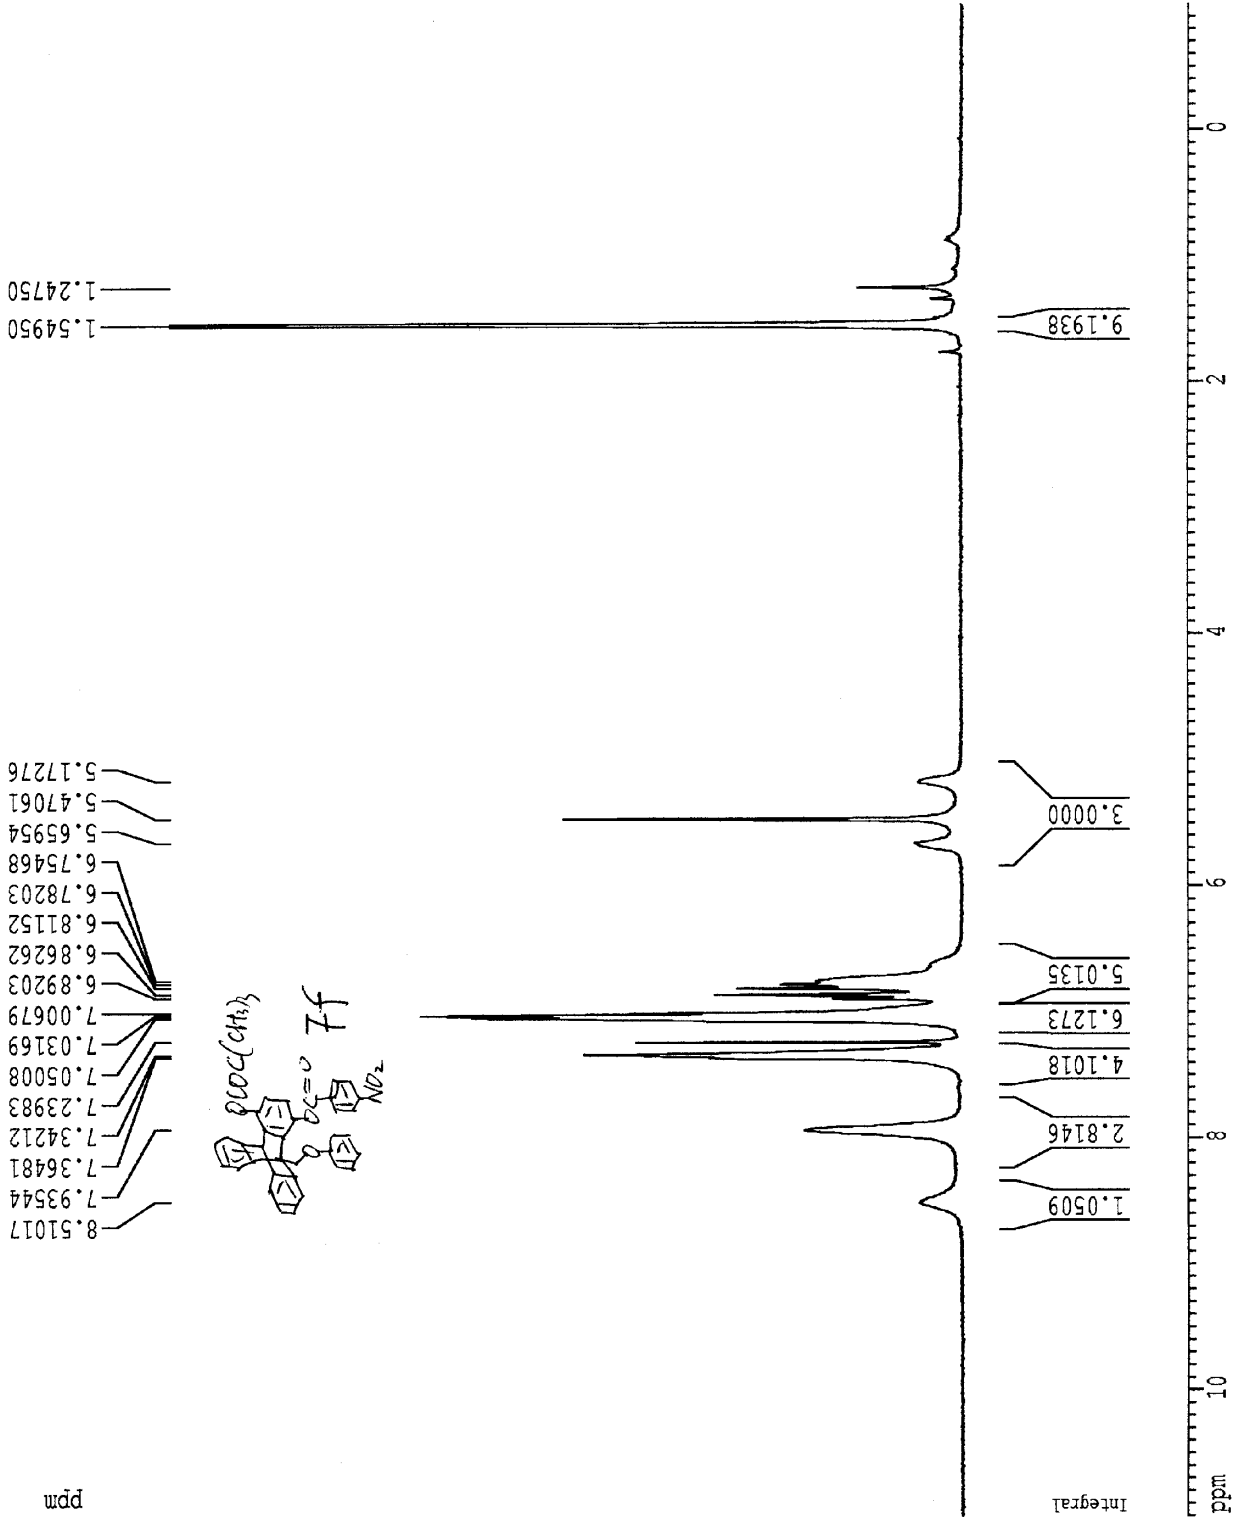

Current Data Parameters  
 NAME hphenolh  
 EXPNO 1  
 PROCNO 1

F2 - Acquisition Parameters  
 Date\_ 20051225  
 Time\_ 12.03

INSTRUM spect  
 PROBHD 5 mm Multinu  
 PULPROG zg30  
 TD 32768  
 SOLVENT CDCl3  
 NS 16  
 DS 2  
 SWH 6188.119 Hz  
 FIDRES 0.188846 Hz  
 AQ 2.6477044 sec  
 RG 203.2  
 DW 80.800 usec  
 DE 6.00 usec  
 TE 300.0 K  
 D1 1.0000000 sec  
 F1 14.10 usec  
 SFO1 300.1318534 MHz  
 NUC1 1H  
 PL1 3.00 dB

F2 - Processing parameters  
 SI 16384  
 SF 300.1300110 MHz  
 WDW EM  
 SSB 0  
 LB 0.30 Hz  
 GB 0  
 PC 1.00

1D NMR plot parameters  
 CX 20.00 cm  
 FIP 11.000 ppm  
 F1 3301.43 Hz  
 F2P -1.000 ppm  
 F2 -300.13 Hz  
 PPMCM 0.60000 ppm/cm  
 HZCM 180.07800 Hz/cm

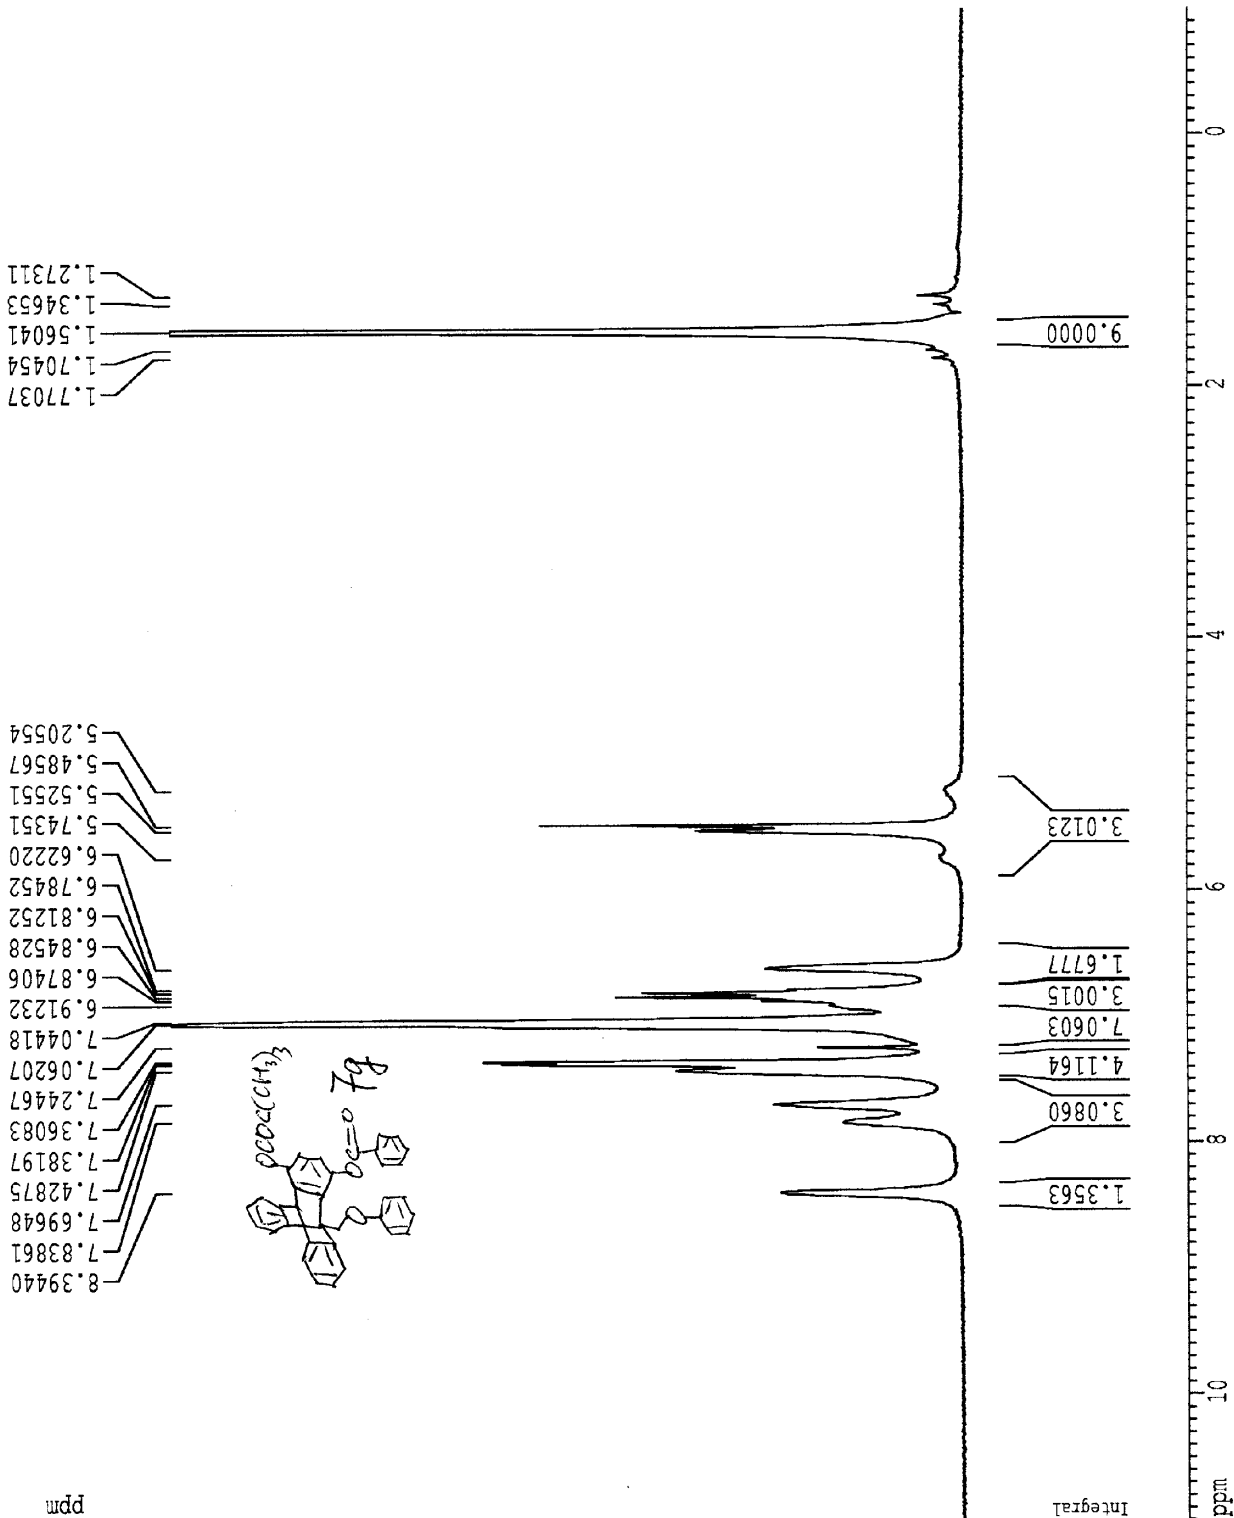

Current Data Parameters  
 NAME phenoltripime  
 EXPNO 1  
 PROCNO 1

F2 - Acquisition Parameters  
 Date\_ 20051227  
 Time 15.46  
 INSTRUM spect  
 PROBED 5 mm Multinu  
 PULPROG zg30  
 TD 32768  
 SOLVENT CDCl3  
 NS 32  
 DS 2  
 SWH 6188.119 Hz  
 FIDRES 0.188846 Hz  
 AQ 2.6477044 sec  
 RG 812.7  
 DW 80.800 usec  
 DE 6.00 usec  
 TE 300.0 K  
 D1 1.0000000 sec  
 P1 14.10 usec  
 SFO1 300.1318534 MHz  
 NUC1 1H  
 PL1 3.00 dB

F2 - Processing parameters  
 SI 16384  
 SF 300.1300113 MHz  
 WDW EM  
 SSB 0  
 LB 0.30 Hz  
 GB 0  
 PC 1.00

1D NMR plot parameters  
 CX 20.00 cm  
 FLP 11.000 ppm  
 F1 3301.43 Hz  
 F2P -1.000 ppm  
 F2 -300.13 Hz  
 PPMCM 0.60000 ppm/cm  
 HZCM 180.07800 Hz/cm

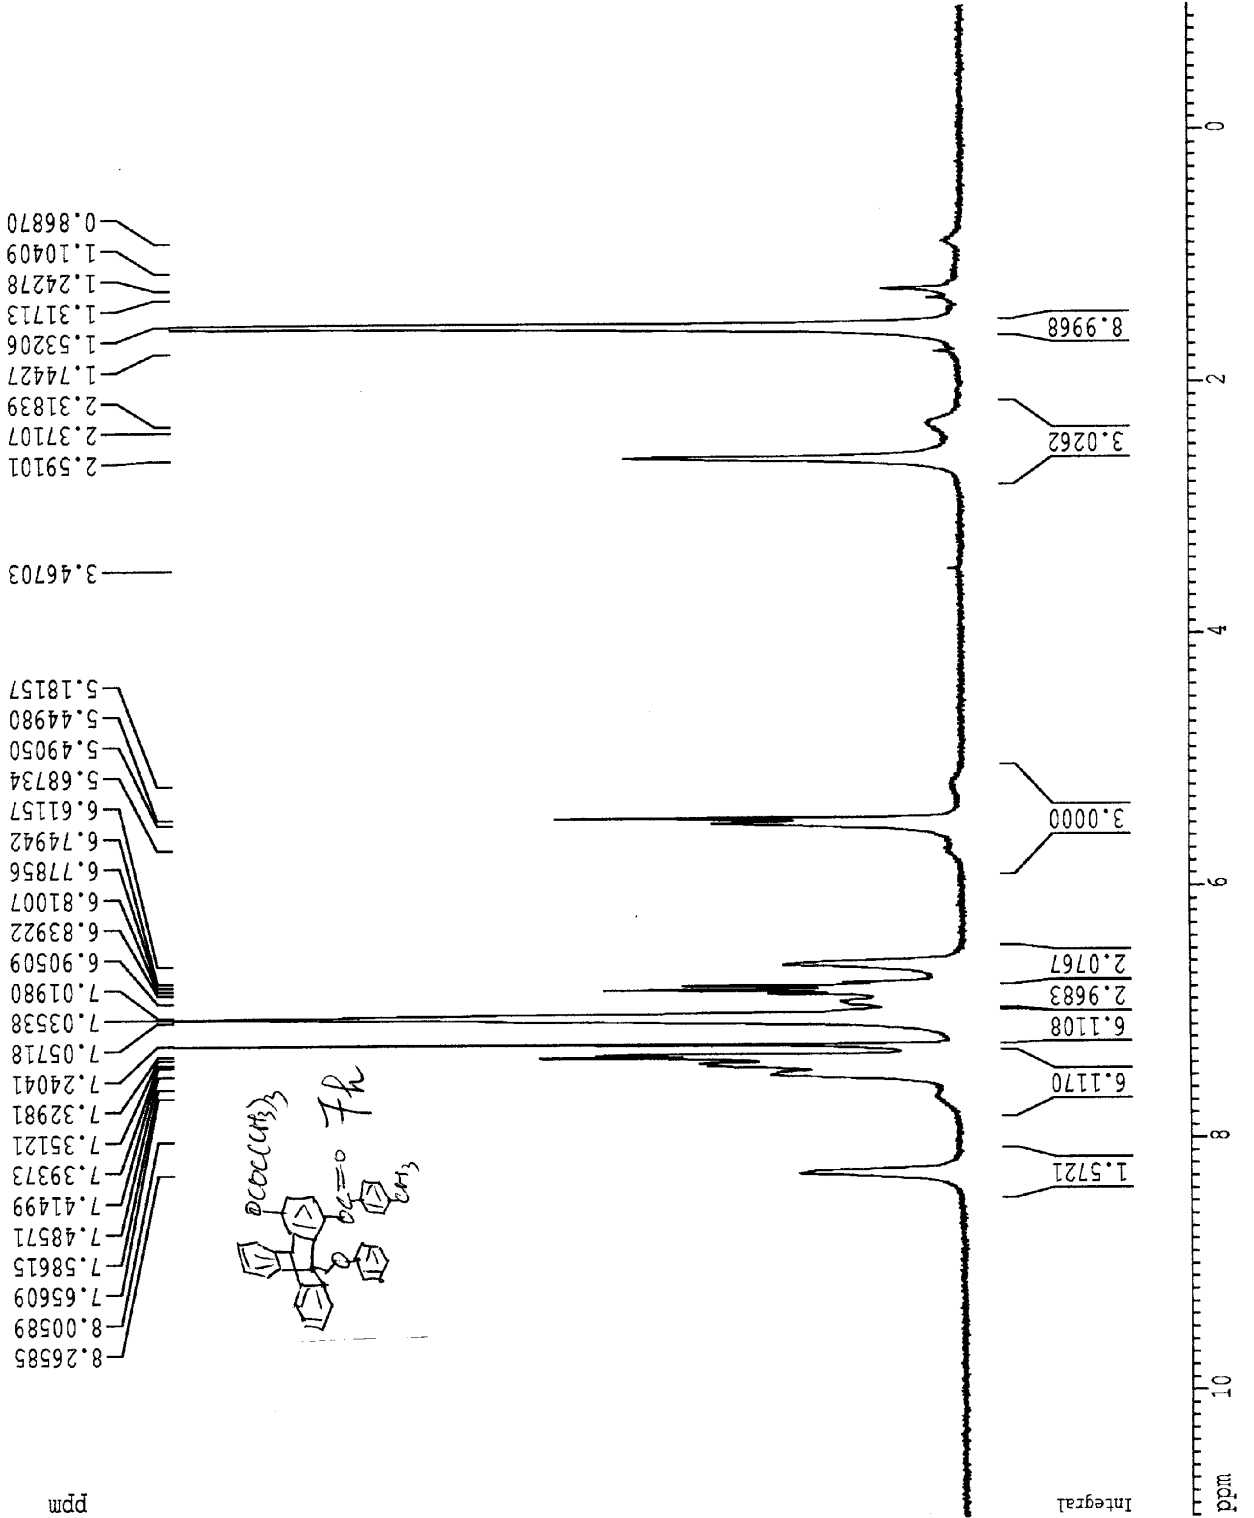

Current Data Parameters  
 NAME hphenolmeo  
 EXPNO 1  
 PROCNO 1

F2 - Acquisition Parameters  
 Date\_ 20051227  
 Time 21.39  
 INSTRUM spect  
 PROBHD 5 mm Multinu  
 PULPROG zg30  
 TD 32768  
 SOLVENT CDCl3  
 NS 16  
 DS 2  
 SWE 6188.119 Hz  
 FIDRES 0.188846 Hz  
 AQ 2.6477044 sec  
 RG 228.1  
 DW 80.800 usec  
 DE 6.00 usec  
 TE 300.0 K  
 D1 1.0000000 sec  
 F1 14.10 usec  
 SFO1 300.1318534 MHz  
 NUC1 1H  
 PL1 3.00 dB

F2 - Processing parameters  
 SI 16384  
 SF 300.1300117 MHz  
 WDW EM  
 SSB 0  
 LB 0.30 Hz  
 GB 0  
 PC 1.00

1D NMR plot parameters  
 CX 20.00 cm  
 F1P 11.000 ppm  
 F1 3301.43 Hz  
 F2P -1.000 ppm  
 F2 -300.13 Hz  
 PPMCM 0.60000 ppm/cm  
 HZCM 180.07800 Hz/cm

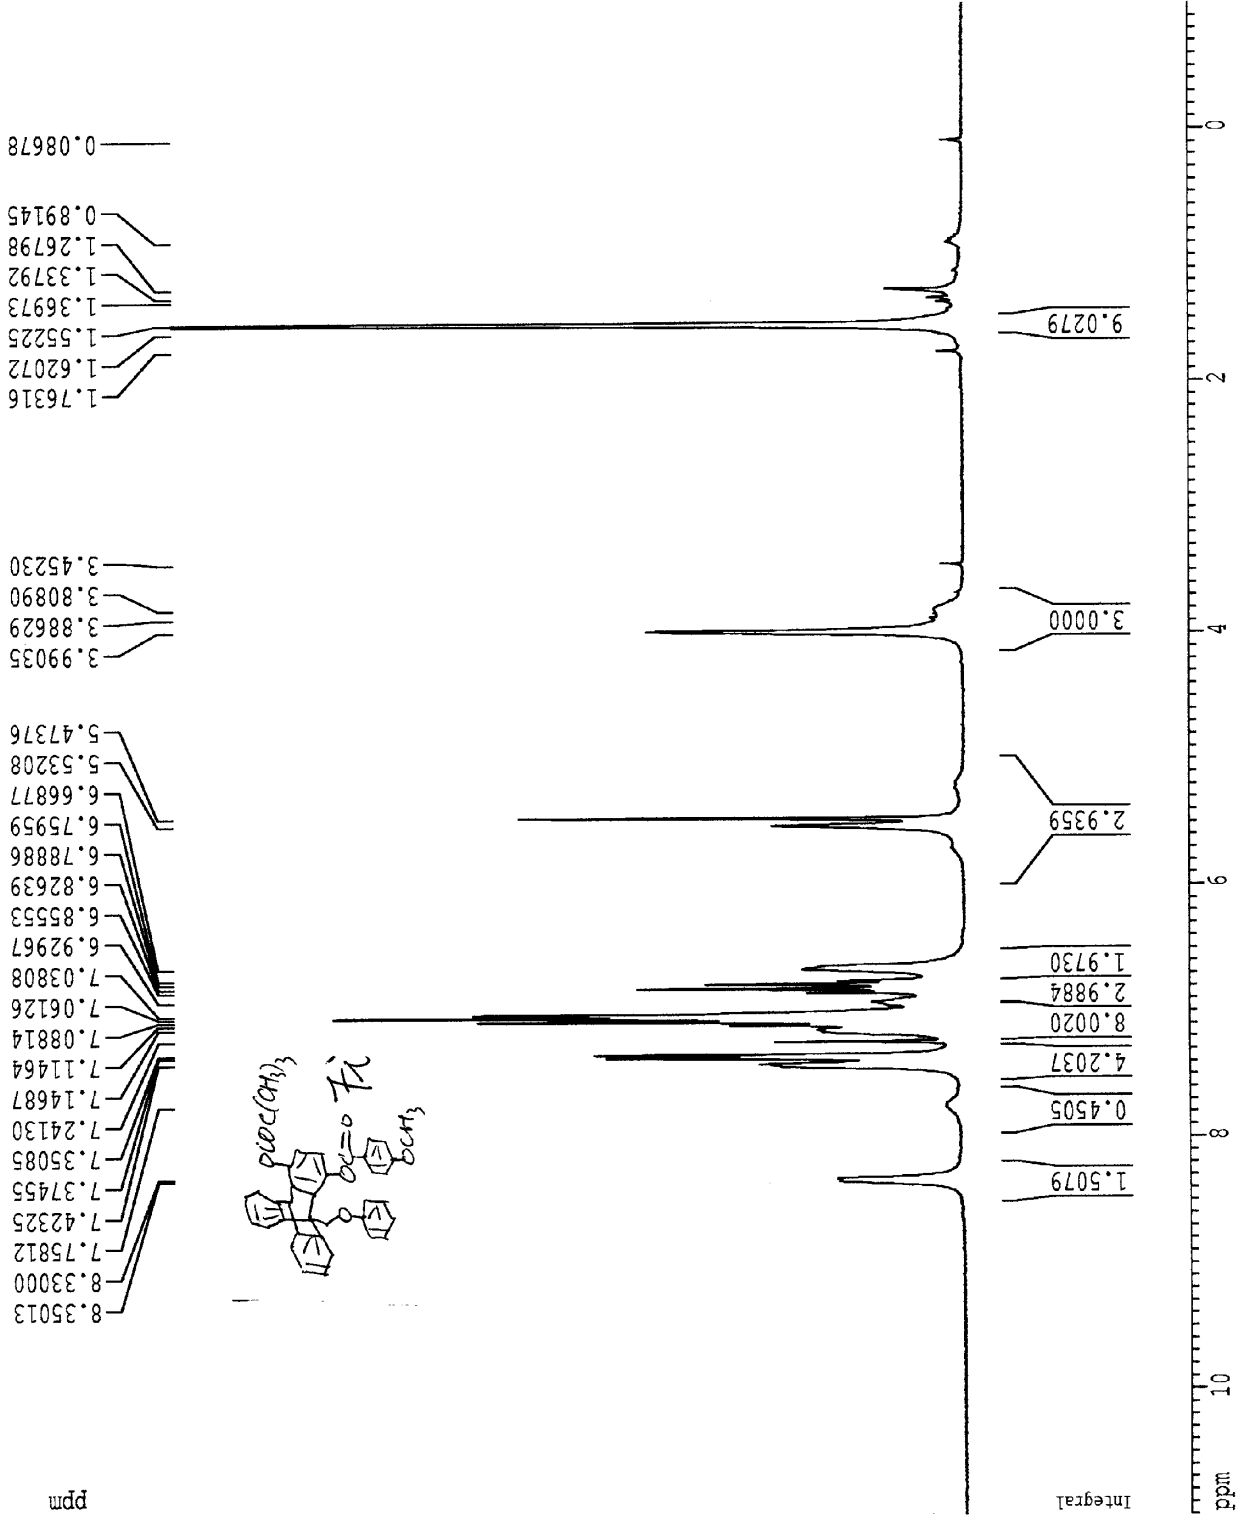

Current Data Parameters

NAME nitrophenof  
EXPNO 1  
PROCNO 1

F2 - Acquisition Parameters

Date\_ 20060524

Time 9.38

INSTRUM spect

PROBHD 5 mm GNP 1H

PULPROG zg30

TD 32768

SOLVENT: CDCl3

NS 64

DS 2

SWH 4111.842 Hz

FIDRES 0.125483 Hz

AQ 3.9846387 sec

RG 8192

DW 121.600 usec

DE 6.00 usec

TE 300.0 K

D1 1.00000000 sec

P1 6.30 usec

SFO1 200.1312359 MHz

NUC1 1H

PL1 -6.00 dB

F2 - Processing parameters

SI 16384

SF 200.1300128 MHz

WDW EM

SSB 0

LB 0.30 Hz

GB 0

PC 1.00

1D NMR plot parameters

CX 20.00 cm

F1P 11.000 ppm

F1 2201.43 Hz

F2P -1.000 ppm

F2 -200.13 Hz

PPMCM 0.60000 ppm/cm

HZCM 120.07801 Hz/cm

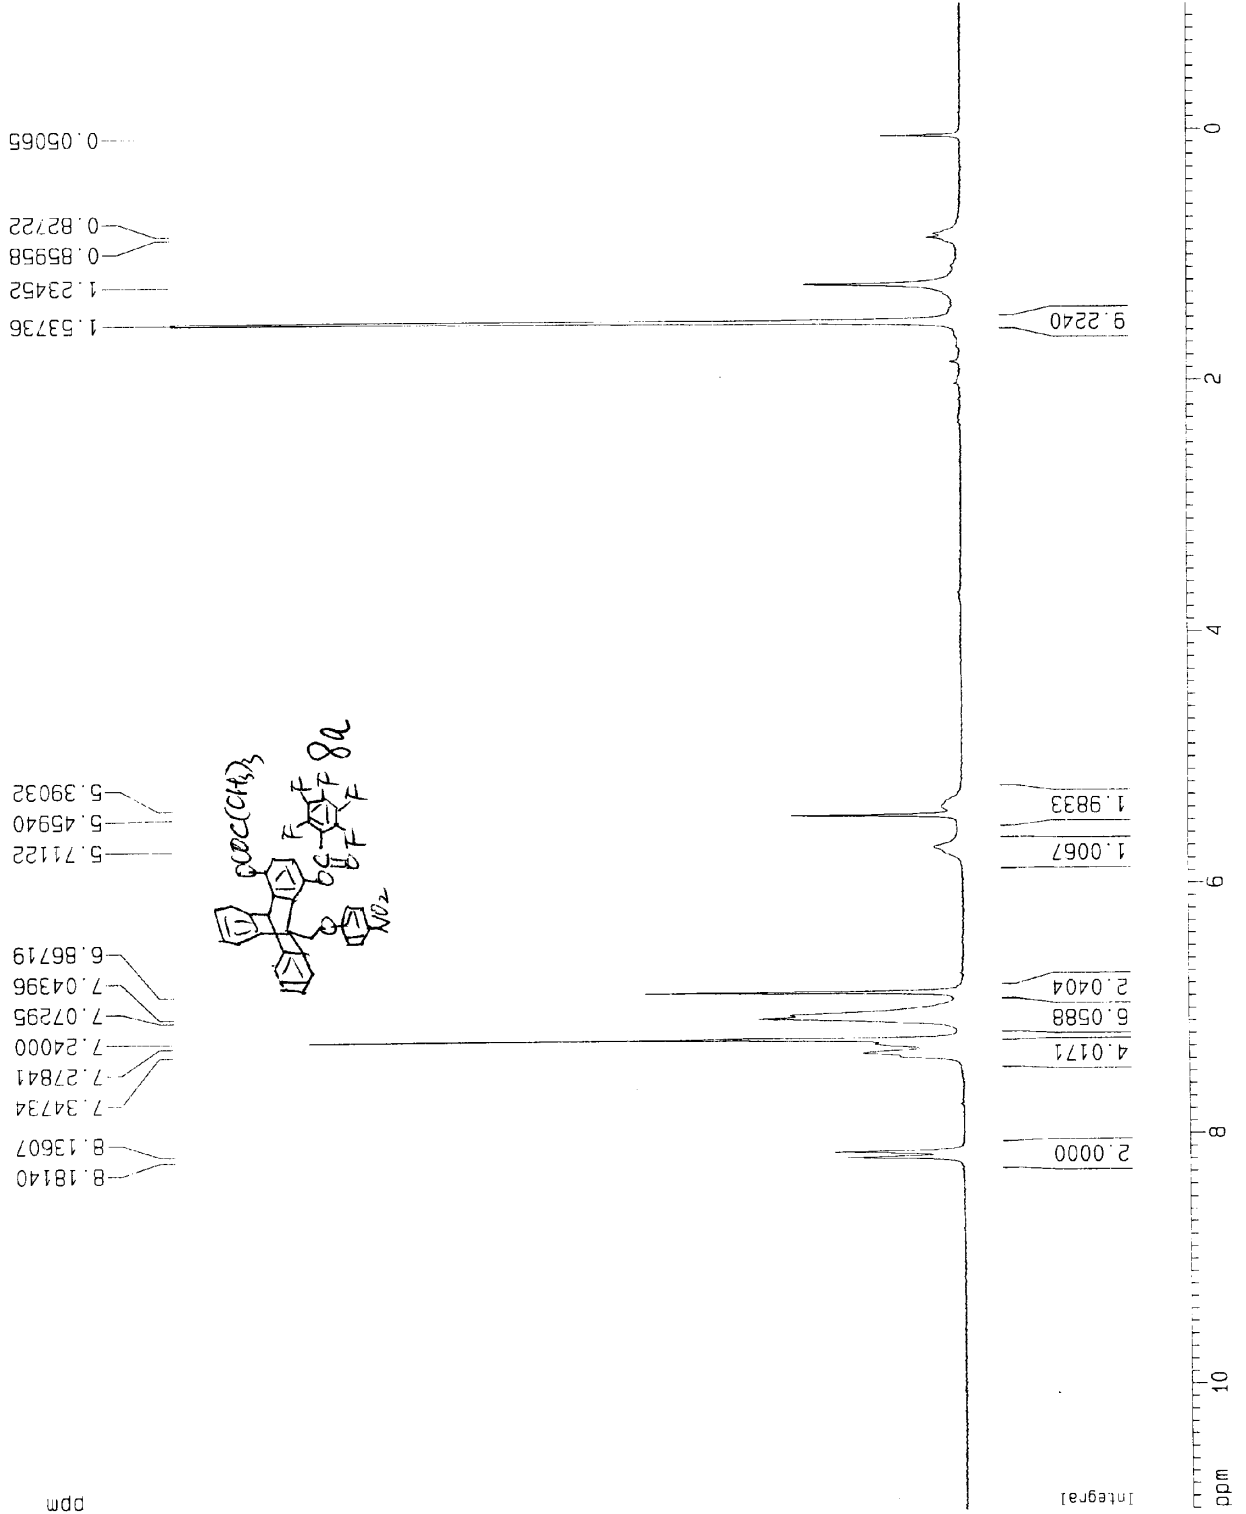



Current Data Parameters  
 NAME nitrophenol  
 EXPNO 1  
 PROCNO 1

F2 - Acquisition Parameters  
 Date\_ 20051114  
 Time 14.58  
 INSTRUM spect  
 PROBED 5 mm Multinu  
 PULPROG zg30  
 TD 32768  
 SOLVENT CDCl3  
 NS 16  
 DS 2  
 SWH 6188.119 Hz  
 FIDRES 0.188846 Hz  
 AQ 2.6477044 sec  
 RG 1024  
 DW 80.800 usec  
 DE 6.00 usec  
 TE 300.0 K  
 D1 1.0000000 sec  
 P1 14.10 usec  
 SFO1 300.1318534 MHz  
 NUC1 <sup>1</sup>H  
 PL1 3.00 dB

F2 - Processing parameters  
 SI 16384  
 SF 300.1300121 MHz  
 WDW EM  
 SSB 0  
 LB 0.30 Hz  
 GB 0  
 PC 1.00

1D NMR plot parameters  
 CX 20.00 cm  
 FIP 11.000 ppm  
 F1 3301.43 Hz  
 F2P -1.000 ppm  
 F2 -300.13 Hz  
 PPMCM 0.60000 ppm/cm  
 HZCM 180.07800 Hz/cm

2.96036  
 1.74659  
 1.68152  
 1.60448  
 1.53591  
 1.52278  
 1.46273  
 1.40046  
 1.32154  
 1.23598  
 1.08910  
 0.86250  
 0.83698  
 0.81223

8.39747  
 8.25423  
 8.01080  
 7.98017  
 7.78434  
 7.60637  
 7.58630  
 7.37689  
 7.35422  
 7.26948  
 7.24050  
 7.09037  
 7.06657  
 7.04342  
 6.86827  
 6.83902  
 6.77911  
 6.74937  
 6.66251  
 6.53407  
 6.47135  
 5.77849  
 5.56887  
 5.46090  
 5.32729

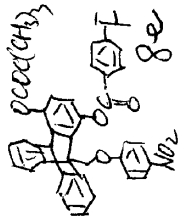

9.0310

0.5143

1.1241

1.5511

0.9693

3.9052

4.7968

4.5058

0.9047

2.0000

0.9231

ppm

Integral

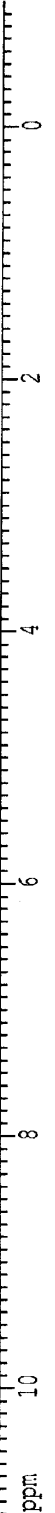

Current Data Parameters  
 NAME nitrophenolno2  
 EXNO 4  
 PROCNO 1

F2 - Acquisition Parameters

Date\_ 20060605  
 Time 20.40  
 INSTRUM spect  
 PROBED 5 mm Multinu  
 PULPROG zg30  
 TD 32768  
 SOLVENT CDCl3  
 NS 64  
 DS 2  
 SWH 6188.119 Hz  
 FIDRES 0.188846 Hz  
 AQ 2.6477044 sec  
 RG 362  
 DW 80.800 usec  
 DE 6.00 usec  
 TE 300.0 K  
 D1 1.00000000 sec  
 P1 14.10 usec  
 SFO1 300.1318534 MHz  
 NUC1 1H  
 PL1 3.00 dB

F2 - Processing parameters

SI 16384  
 SF 300.1300121 MHz  
 WDW EM  
 SSB 0  
 LB 0.30 Hz  
 GB 0  
 PC 1.00

1D NMR plot parameters

CX 20.00 cm  
 F1P 8.998 ppm  
 F1 2700.46 Hz  
 F2P 1.385 ppm  
 F2 415.72 Hz  
 PPMCM 0.38062 ppm/cm  
 HZCM 114.23696 Hz/cm

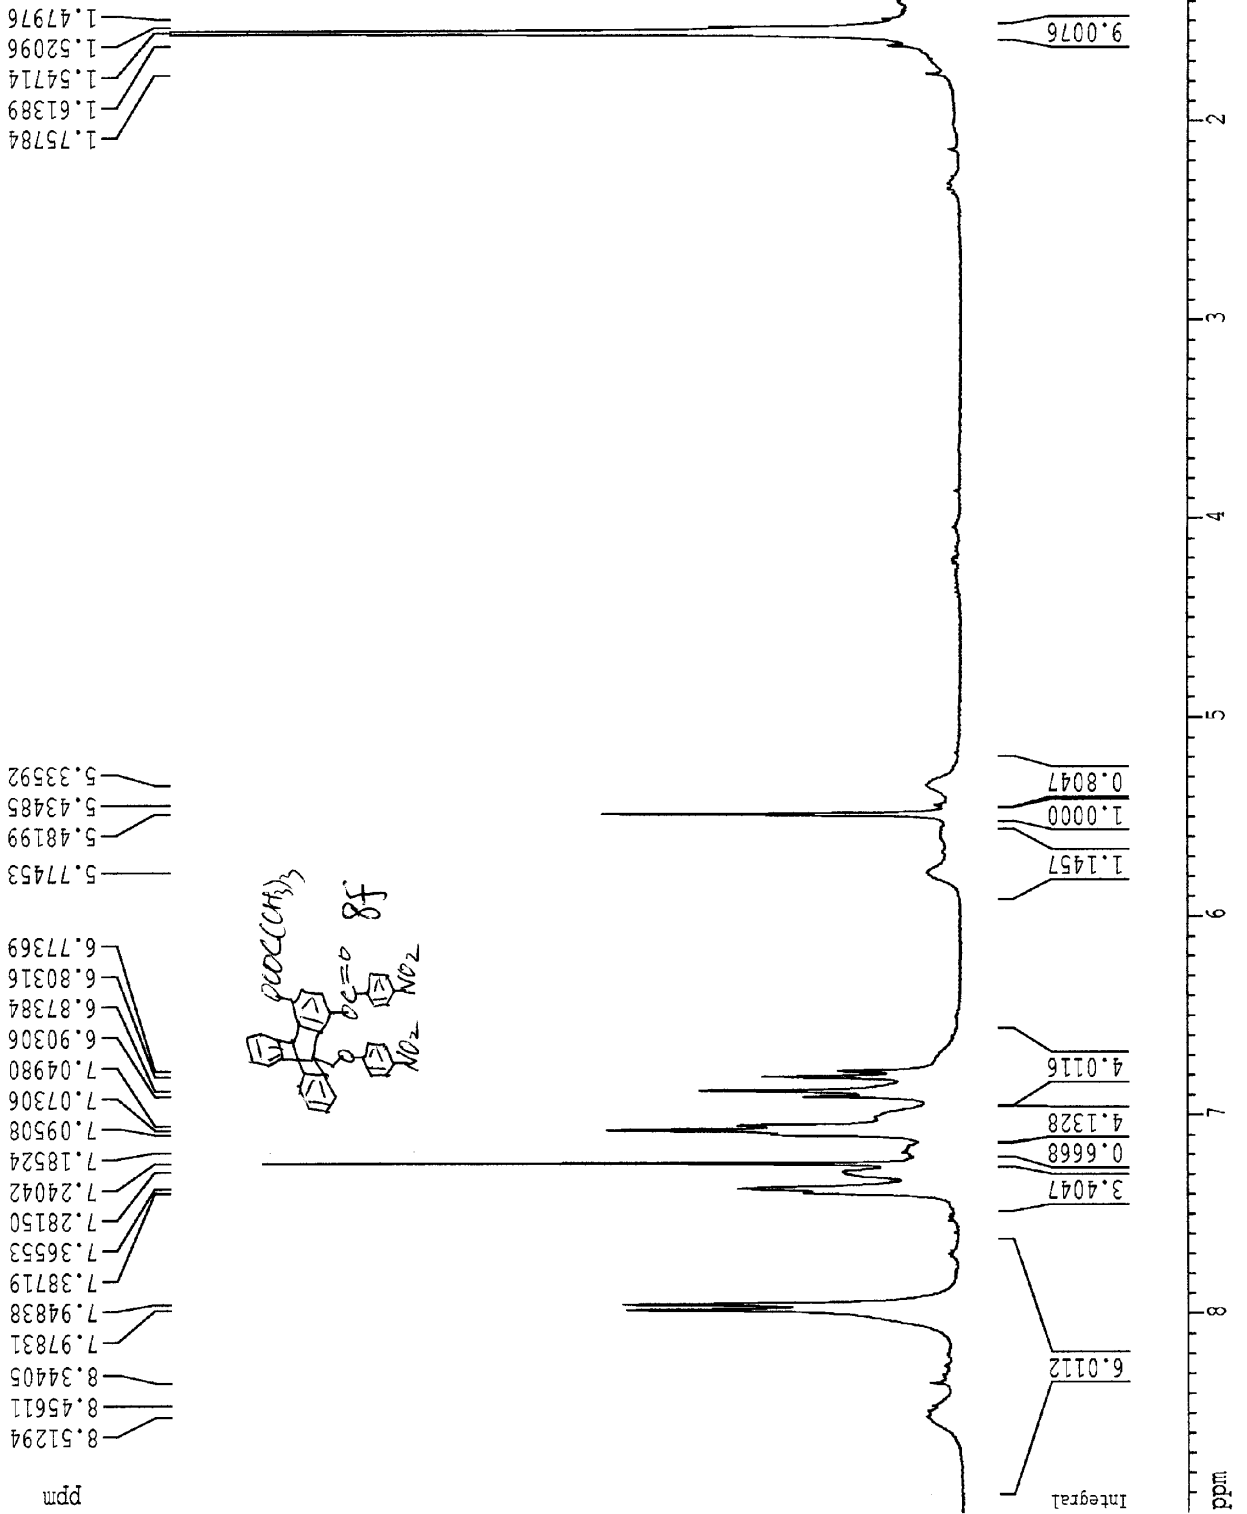

Current Data Parameters  
 NAME nitrophenol-h  
 EXPNO 1  
 PROCNO 1

F2 - Acquisition Parameters

Date\_ 20051108  
 Time 16.16  
 INSTRUM spect  
 PROBED 5 mm Multinu  
 PULPROG zg30  
 TD 32768  
 SOLVENT CDCl3  
 NS 16  
 DS 2  
 SWH 6188.119 Hz  
 FIDRES 0.188846 Hz  
 AQ 2.6477044 sec  
 RG 912.3  
 DW 80.800 usec  
 DE 6.00 usec  
 TE 300.0 K  
 D1 1.00000000 sec  
 F1 14.10 usec  
 SFO1 300.1318534 MHz  
 NUC1 1H  
 PL1 3.00 dB

F2 - Processing parameters  
 SI 16384  
 SF 300.1300121 MHz  
 WDW EM  
 SSB 0  
 LB 0.30 Hz  
 GB 0  
 PC 1.00

1D NMR plot parameters  
 CX 20.00 cm  
 FIP 11.000 ppm  
 F1 3301.43 Hz  
 F2P -1.000 ppm  
 F2 -300.13 Hz  
 PPMCM 0.60000 ppm/cm  
 HZCM 180.07800 Hz/cm

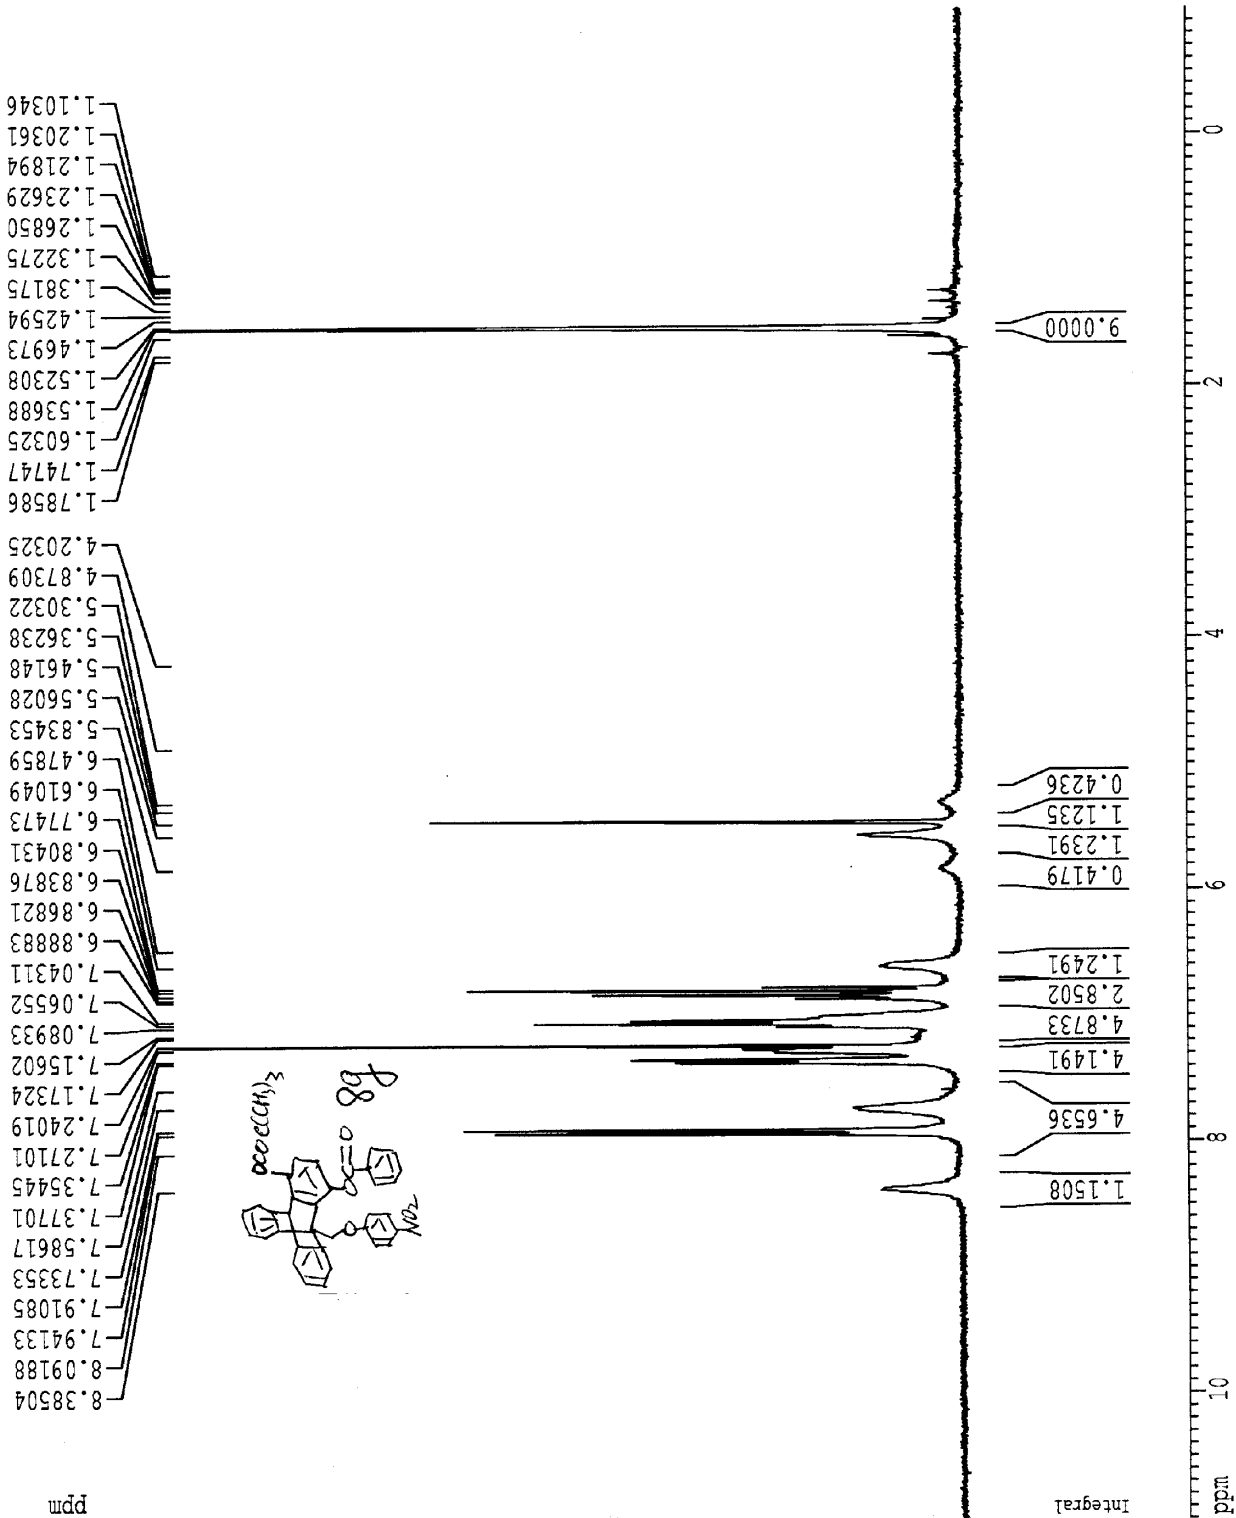

Current Data Parameters  
 NAME nitrophenolme  
 EXPNO 1  
 PROCNO 1

F2 - Acquisition Parameters  
 Date\_ 20051213  
 Time\_ 17.17  
 INSTRUM spect  
 PROBHD 5 mm Multinu  
 PULPROG zg30  
 TD 32768  
 SOLVENT CDCl3  
 NS 16  
 DS 2  
 SWE 6188.119 Hz  
 FIDRES 0.188846 Hz  
 AQ 2.6477044 sec  
 RG 512  
 DW 80.800 usec  
 DE 6.00 usec  
 TE 300.0 K  
 D1 1.00000000 sec  
 P1 14.10 usec  
 SF01 300.1318534 MHz  
 NUC1 1H  
 PL1 3.00 dB

F2 - Processing parameters  
 SI 16384  
 SF 300.1300117 MHz  
 WDW EM  
 SSB 0  
 LB 0.30 Hz  
 GB 0  
 PC 1.00

1D NMR plot parameters  
 CX 20.00 cm  
 F1P 11.000 ppm  
 F1 3301.43 Hz  
 F2P -1.000 ppm  
 F2 -300.13 Hz  
 PPMCM 0.60000 ppm/cm  
 HZCM 180.07800 Hz/cm

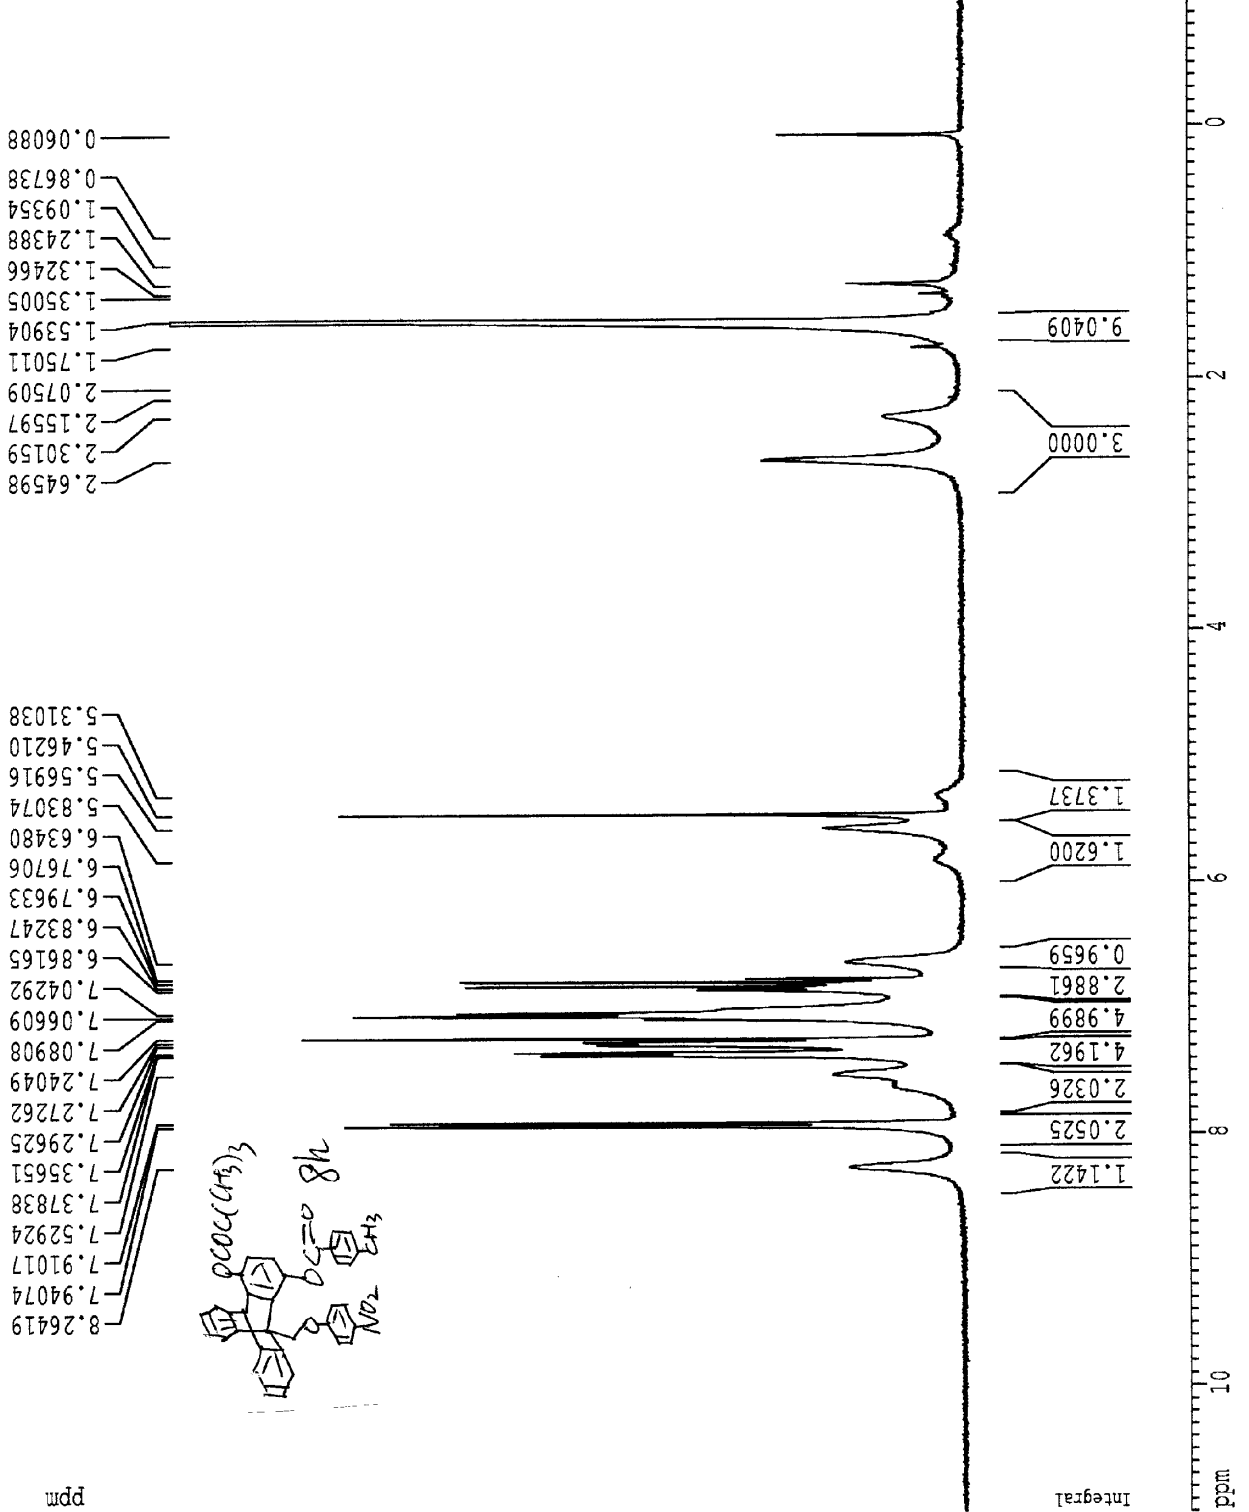

Current Data Parameters  
 NAME nitrophenomeo2  
 EXPNO 2  
 PROCNO 1

F2 - Acquisition Parameters  
 Date\_ 20051104  
 Time 13.05  
 INSTRUM spect  
 PROBED 5 mm Multinu  
 PULPROG zg30  
 TD 32768  
 SOLVENT CDCl3  
 NS 16  
 DS 2  
 SWH 6188.119 Hz  
 FIDRES 0.188846 Hz  
 AQ 2.6477044 sec  
 RG 512  
 DW 80.800 usec  
 DE 6.00 usec  
 TE 300.0 K  
 D1 1.0000000 sec  
 F1 14.10 usec  
 SFO1 300.1318534 MHz  
 NUC1 1H  
 PL1 3.00 dB

F2 - Processing parameters  
 SI 16384  
 SF 300.1300121 MHz  
 WDW EM  
 SSB 0  
 LB 0.30 Hz  
 GB 0  
 PC 1.00

1D NMR plot parameters  
 CX 20.00 cm  
 FIP 11.000 ppm  
 F1 3301.43 Hz  
 F2P -1.000 ppm  
 F2 -300.13 Hz  
 PPMCM 0.60000 ppm/cm  
 HZCM 180.07800 Hz/cm

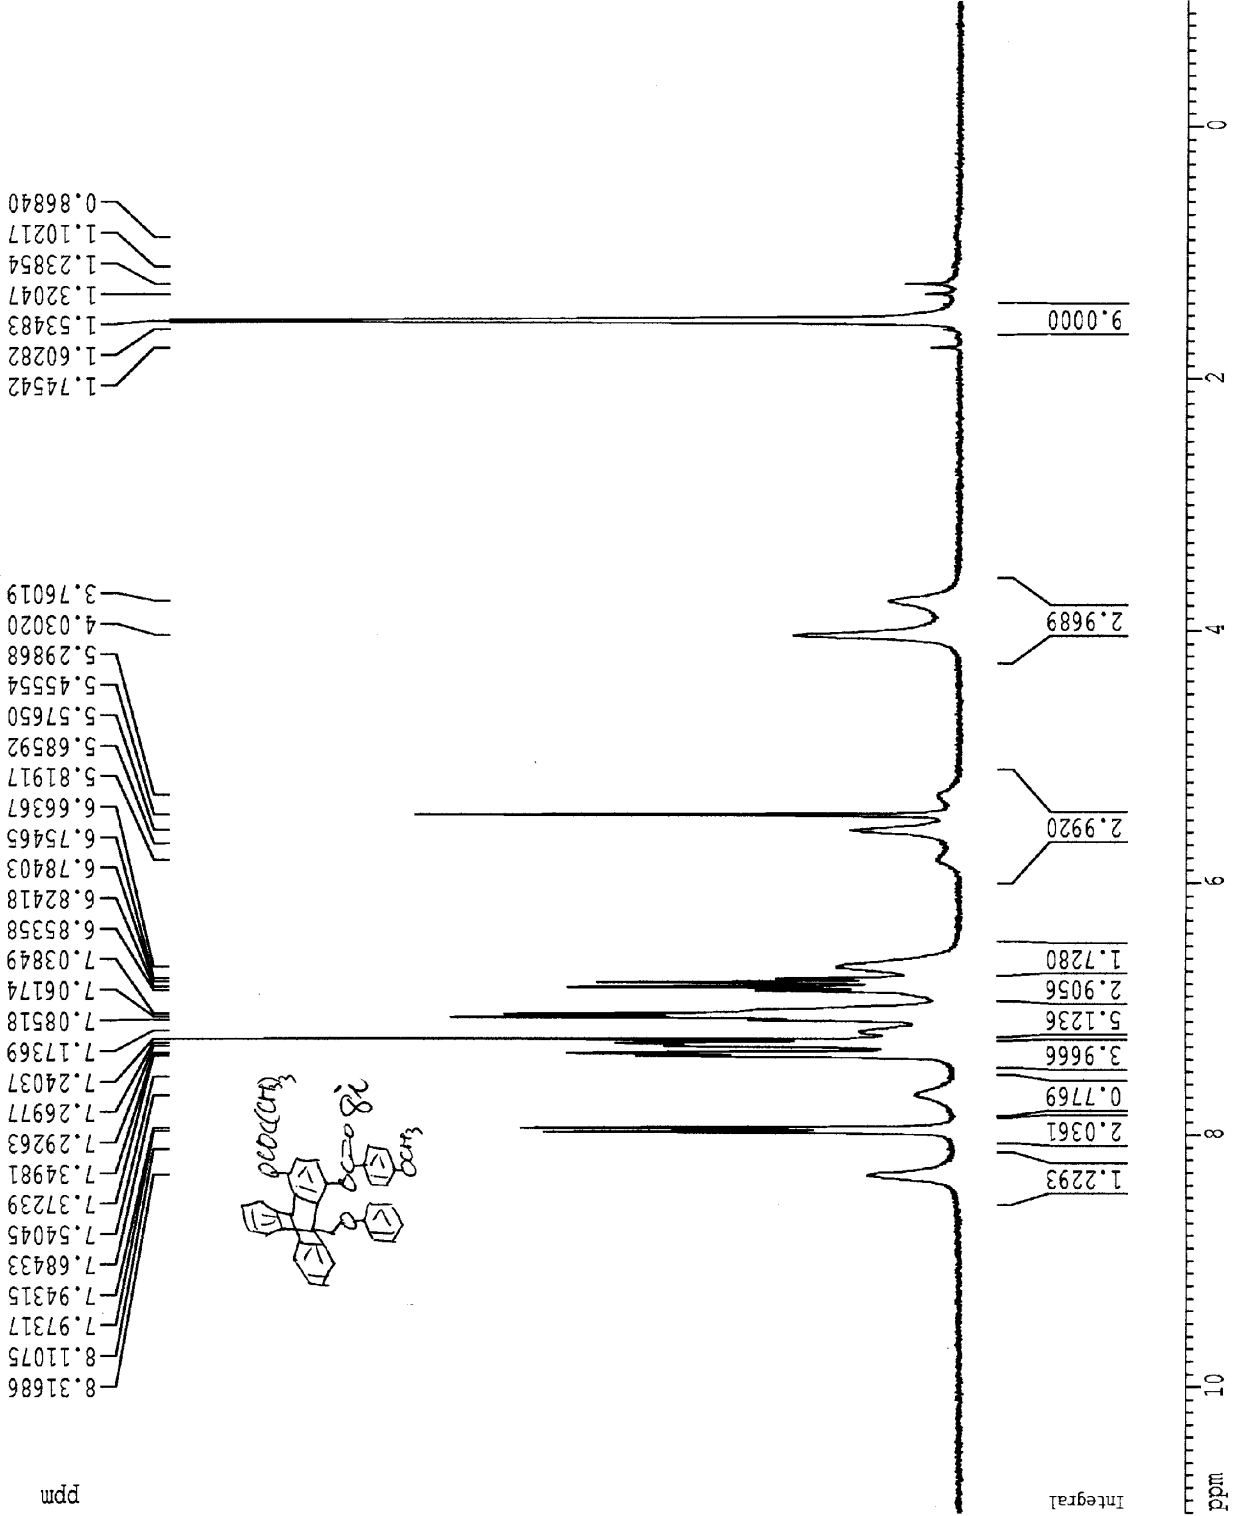

Current Data Parameters  
 NAME trimepheno5f2  
 EXPNO 2  
 PROCNO 1

F2 - Acquisition Parameters  
 Date\_ 20060527  
 Time 14.31

INSTRUM spect  
 PROBED 5 mm Multinu  
 PULPROG zg30  
 TD 32768  
 SOLVENT CDC13  
 NS 39  
 DS 2  
 SWH 6188.119 Hz  
 FIDRES 0.188846 Hz  
 AQ 2.6477044 sec  
 RG 1149.4  
 DW 80.800 usec  
 DE 6.00 usec  
 TE 300.0 K  
 D1 1.0000000 sec  
 P1 14.10 usec  
 SFO1 300.1318534 MHz  
 NUC1 1H  
 PL1 3.00 dB

F2 - Processing parameters  
 SI 16384  
 SF 300.1300125 MHz  
 WDW EM  
 SSB 0  
 LB 0.30 Hz  
 GB 0  
 PC 1.00

1D NMR plot parameters  
 CX 20.00 cm  
 F1P 11.000 ppm  
 F1 3301.43 Hz  
 F2P -1.000 ppm  
 F2 -300.13 Hz  
 PPMCM 0.60000 ppm/cm  
 HZCM 180.07800 Hz/cm

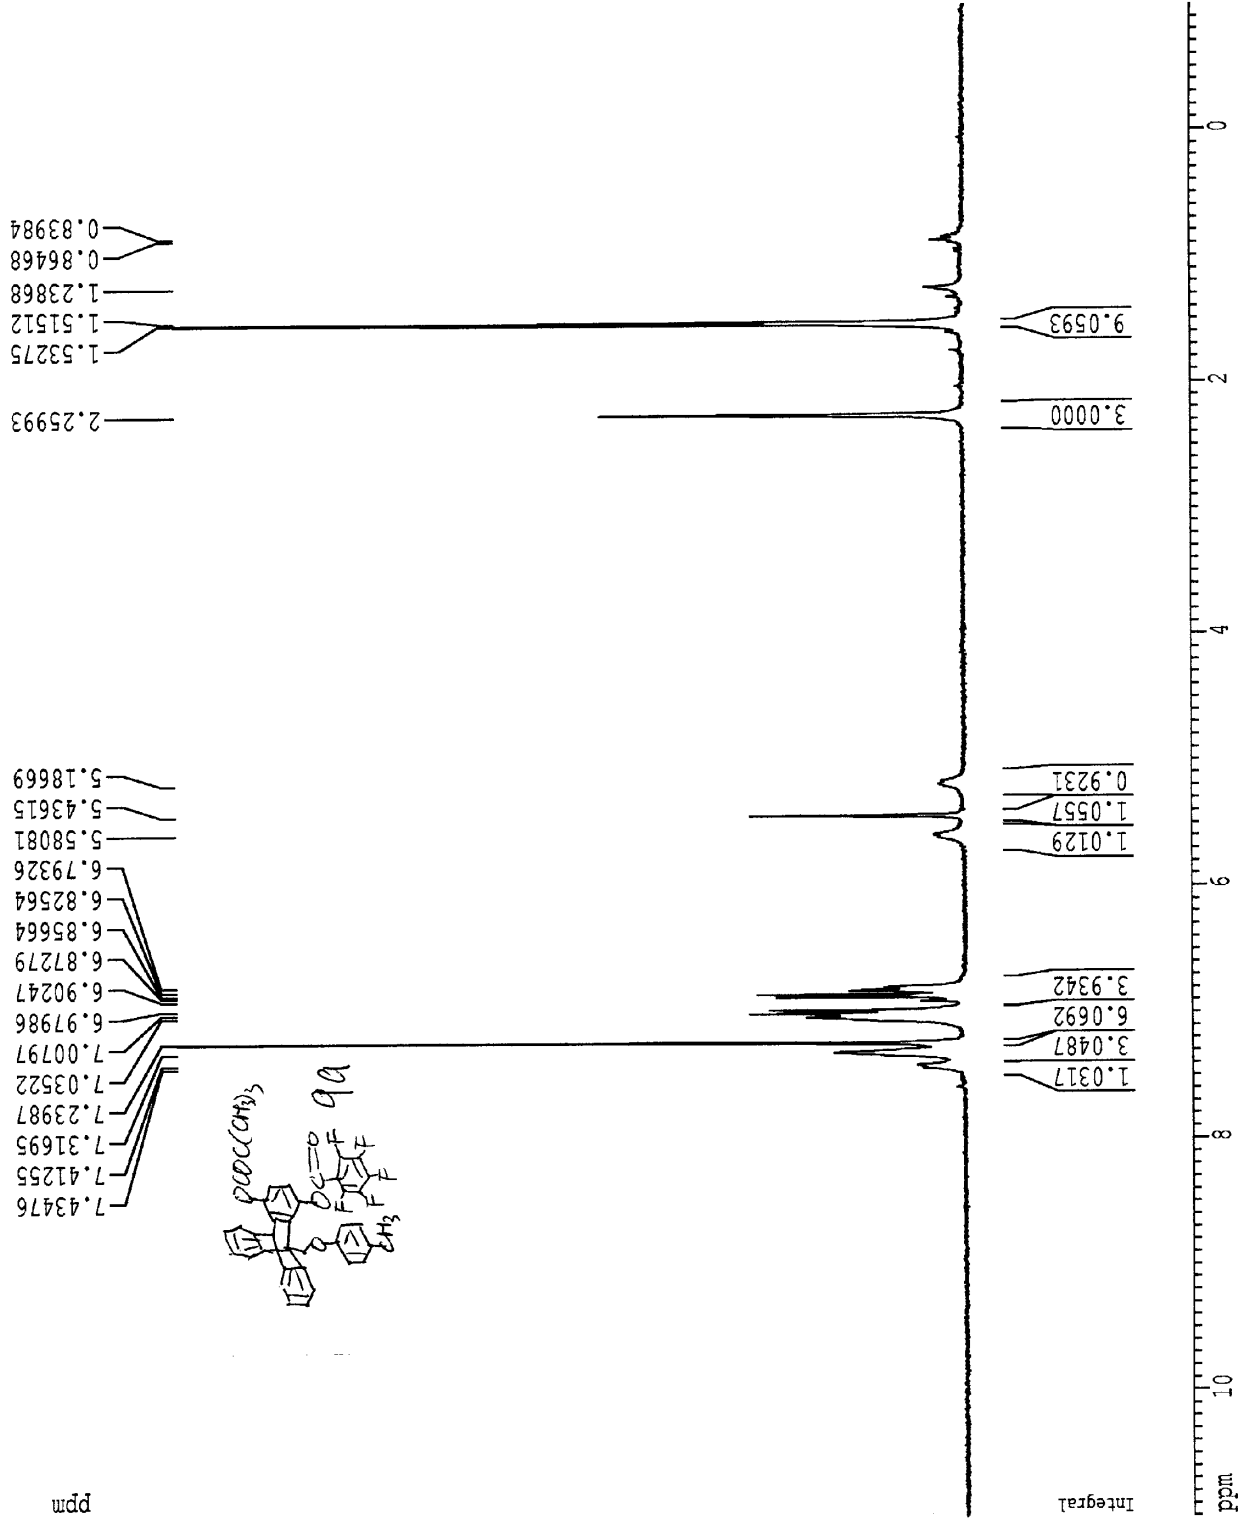

Current Data Parameters  
 NAME meophenol5f3  
 EXPNO 3  
 PROCNO 1

F2 - Acquisition Parameters

Date\_ 20060529  
 Time 14.09  
 INSTRUM spect  
 PROBHD 5 mm Multinu  
 PULPROG zg30  
 TD 32768  
 SOLVENT CDCl3  
 NS 64  
 DS 2  
 SWH 6188.119 Hz  
 FIDRES 0.188845 Hz  
 AQ 2.6477044 sec  
 RG 1149.4  
 DW 80.800 usec  
 DE 6.00 usec  
 TE 300.0 K  
 D1 1.00000000 sec  
 P1 14.10 usec  
 SFO1 300.1318534 MHz  
 NUC1 1H  
 P11 3.00 dB

F2 - Processing parameters

SI 16384  
 SF 300.1300125 MHz  
 WDW EM  
 SSB 0  
 LB 0.30 Hz  
 GB 0  
 PC 1.00

1D NMR plot parameters

CX 20.00 cm  
 F1P 11.000 ppm  
 F1 3301.43 Hz  
 F2P -1.000 ppm  
 F2 -300.13 Hz  
 PPMCM 0.60000 ppm/cm  
 HZCM 180.07800 Hz/cm

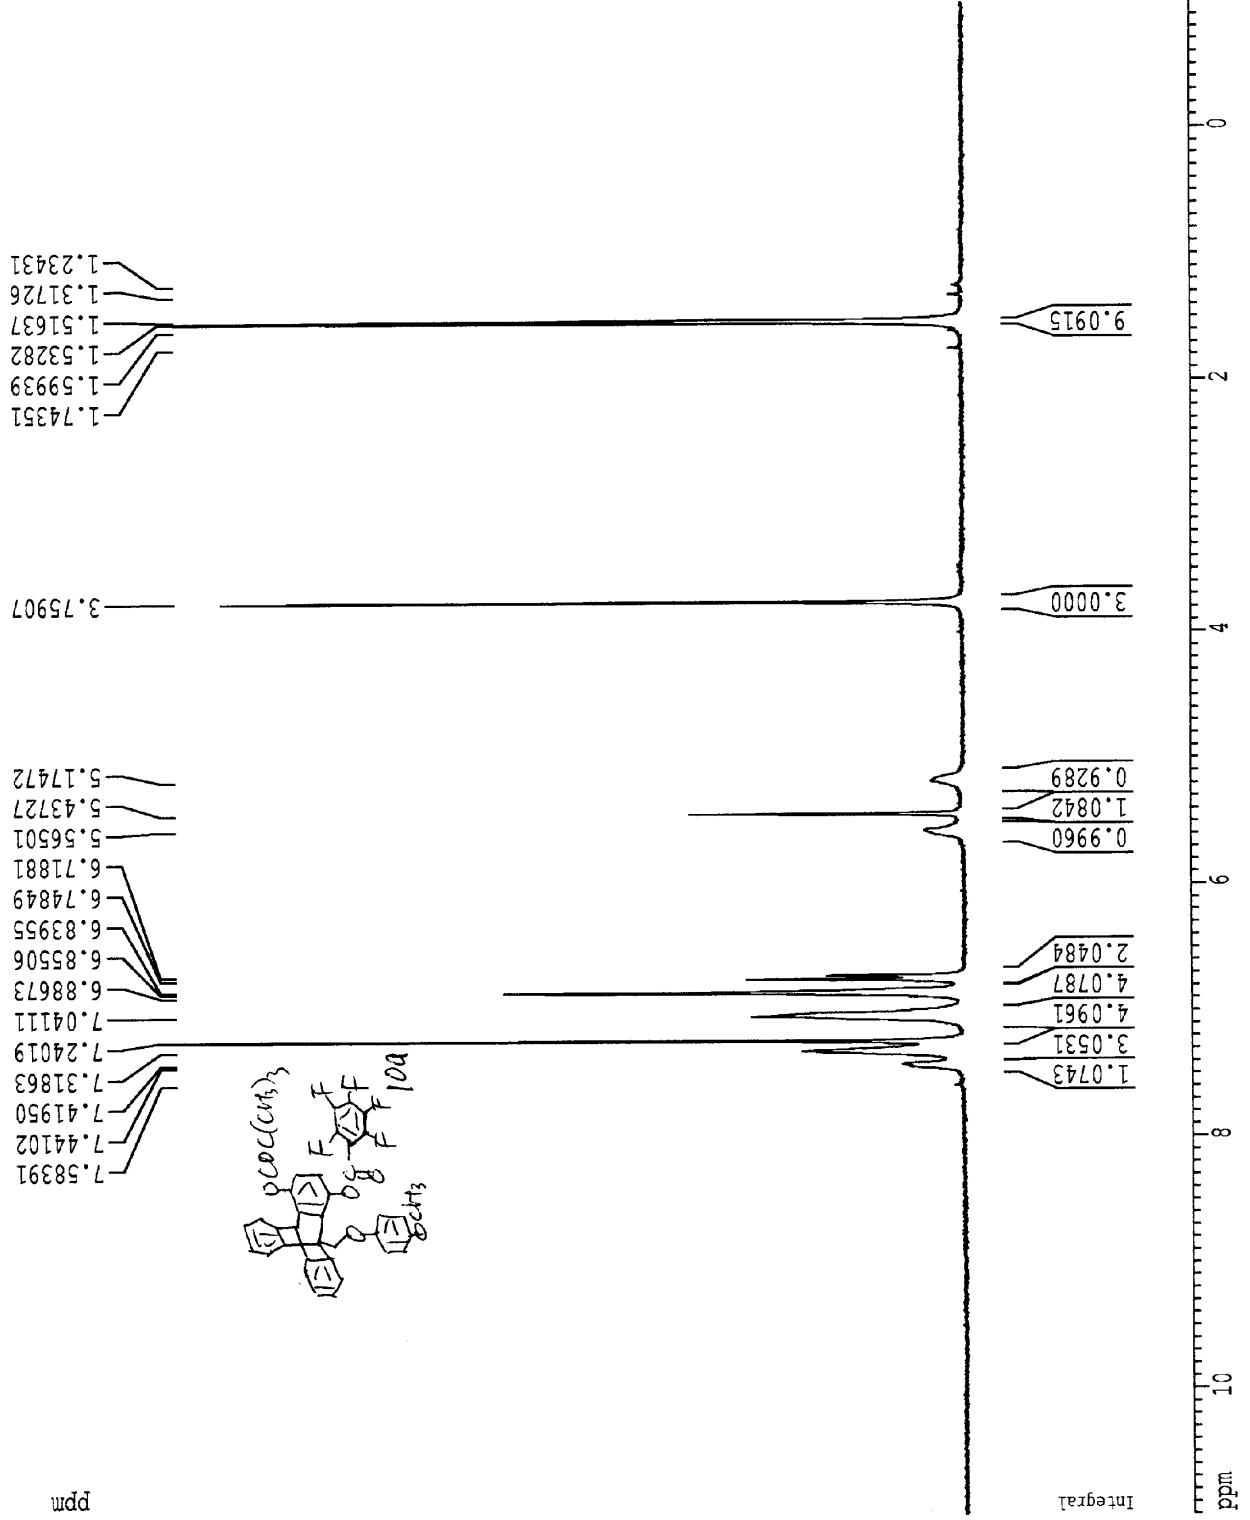

ppm

Integral

ppm

Current Data Parameters  
 NAME dimphenof5f2  
 EXPNO 2  
 PROCNO 1

F2 - Acquisition Parameters  
 Date\_ 20060527  
 Time 20.52  
 INSTRUM spect  
 PROBHD 5 mm Multinu  
 PULPROG zg30  
 TD 32768  
 SOLVENT CDCl3  
 NS 64  
 DS 2  
 SWH 6188.119 Hz  
 FIDRES 0.188846 Hz  
 AQ 2.6477044 sec  
 RG 1290.2  
 DW 80.800 usec  
 DE 6.00 usec  
 TE 300.0 K  
 D1 1.00000000 sec  
 F1 14.10 usec  
 SFO1 300.1318534 MHz  
 NUC1 1H  
 PL1 3.00 dB

F2 - Processing parameters  
 SI 16384  
 SF 300.1300125 MHz  
 WDW EM  
 SSB 0  
 LB 0.30 Hz  
 GB 0  
 PC 1.00

1D NMR plot parameters  
 CX 20.00 cm  
 F1P 11.000 ppm  
 F1 3301.43 Hz  
 F2P -1.000 ppm  
 F2 -300.13 Hz  
 PPMCM 0.60000 ppm/cm  
 HZCM 180.07800 Hz/cm

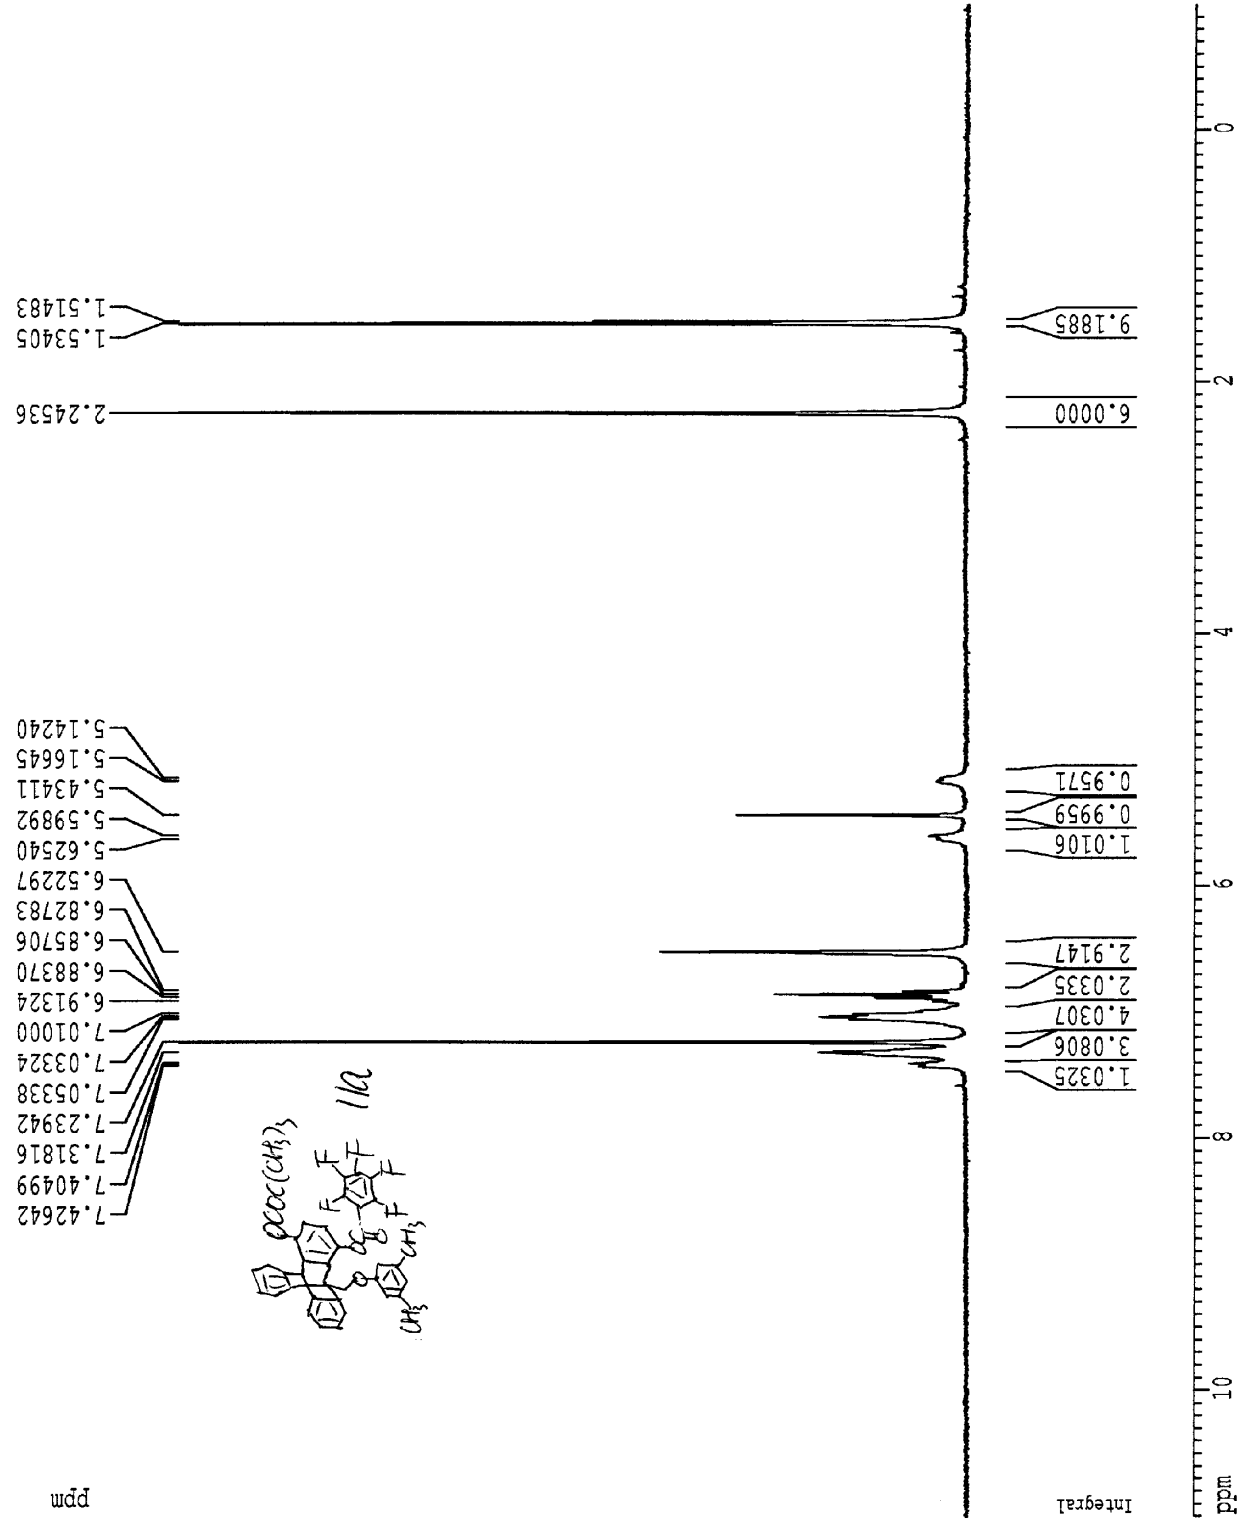

ppm

Integral

ppm



Current Data Parameters  
 NAME trimpheno5f3  
 EXPNO 3  
 PROCNO 1

F2 - Acquisition Parameters  
 Date\_ 20060529  
 Time 10.10  
 INSTRUM spect  
 PROBHD 5 mm Multinu  
 PULPROG zg30  
 TD 32768  
 SOLVENT CDCl3  
 NS 64  
 DS 2  
 SWH 6188.119 Hz  
 FIDRES 0.188846 Hz  
 AQ 2.6477044 sec  
 RG 1149.4  
 DW 80.800 usec  
 DE 6.00 usec  
 TE 300.0 K  
 D1 1.00000000 sec  
 F1 14.10 usec  
 SFO1 300.1318534 MHz  
 NUC1 1H  
 PL1 3.00 dB

F2 - Processing parameters  
 SI 16384  
 SF 300.1300125 MHz  
 WDW EM  
 SSB 0  
 LB 0.30 Hz  
 GB 0  
 PC 1.00

1D NMR plot parameters  
 CX 20.00 cm  
 FIP 11.000 ppm  
 F1 3301.43 Hz  
 F2P -1.000 ppm  
 F2 -300.13 Hz  
 PPMCM 0.60000 ppm/cm  
 HZCM 180.07800 Hz/cm

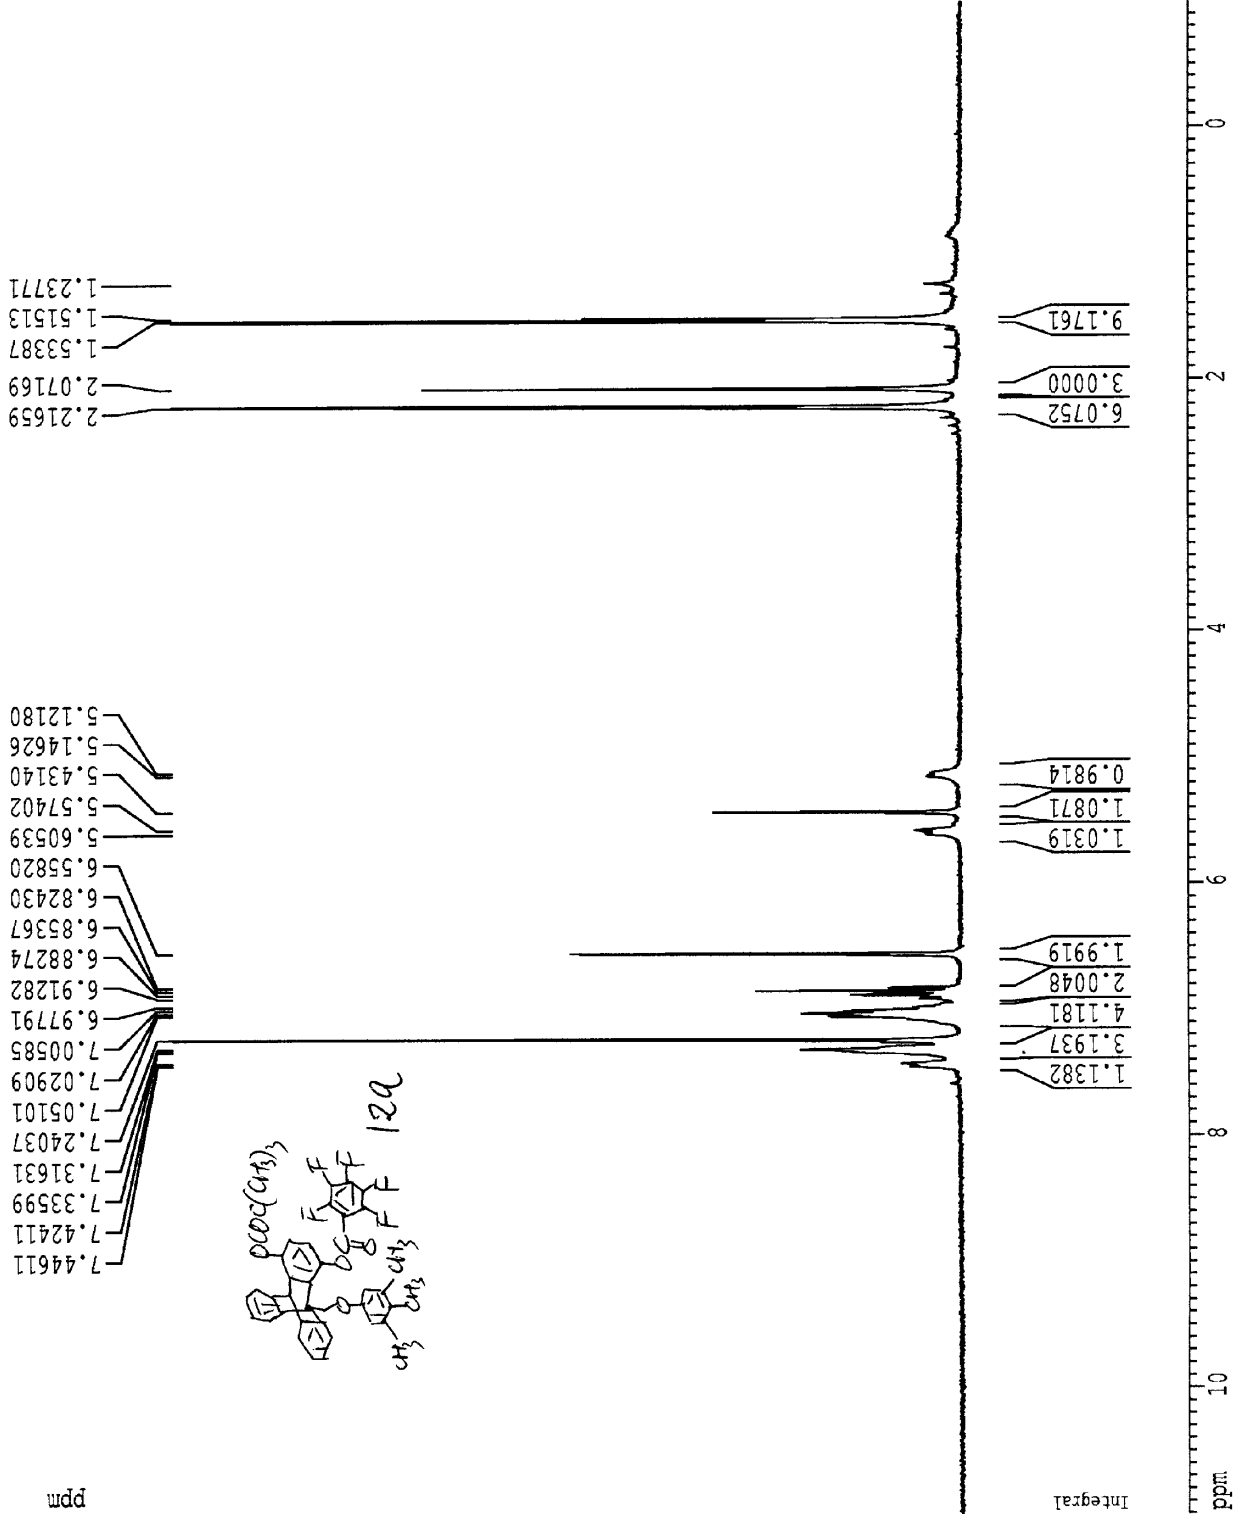

Current Data Parameters

NAME tetrampheno5f  
EXPNO 1  
PROCNO 1

F2 - Acquisition Parameters

Date\_ 20060311  
Time 10.44  
INSTRUM spect  
PROBHD 5 mm Multinu  
PULPROG zg30  
TD 32768  
SOLVENT CDCl3  
NS 16  
DS 2  
SWH 6188.119 Hz  
FIDRES 0.188846 Hz  
AQ 2.6477044 sec  
RG 912.3  
DE 80.800 usec  
TE 300.0 K  
D1 1.0000000 sec  
F1 14.10 usec  
SFO1 300.1318534 MHz  
NUC1 1H  
PL1 3.00 dB

F2 - Processing parameters

SI 16384  
SF 300.1300125 MHz  
WDW EM  
SSB 0  
LB 0.30 Hz  
GB 0  
PC 1.00  
ID NMR pLOT parameters  
CX 20.00 cm  
FLP 7.768 ppm  
F1 2331.42 Hz  
F2P 1.376 ppm  
F2 413.10 Hz  
PPMCM 0.31958 ppm/cm  
HZCM 95.91605 Hz/cm

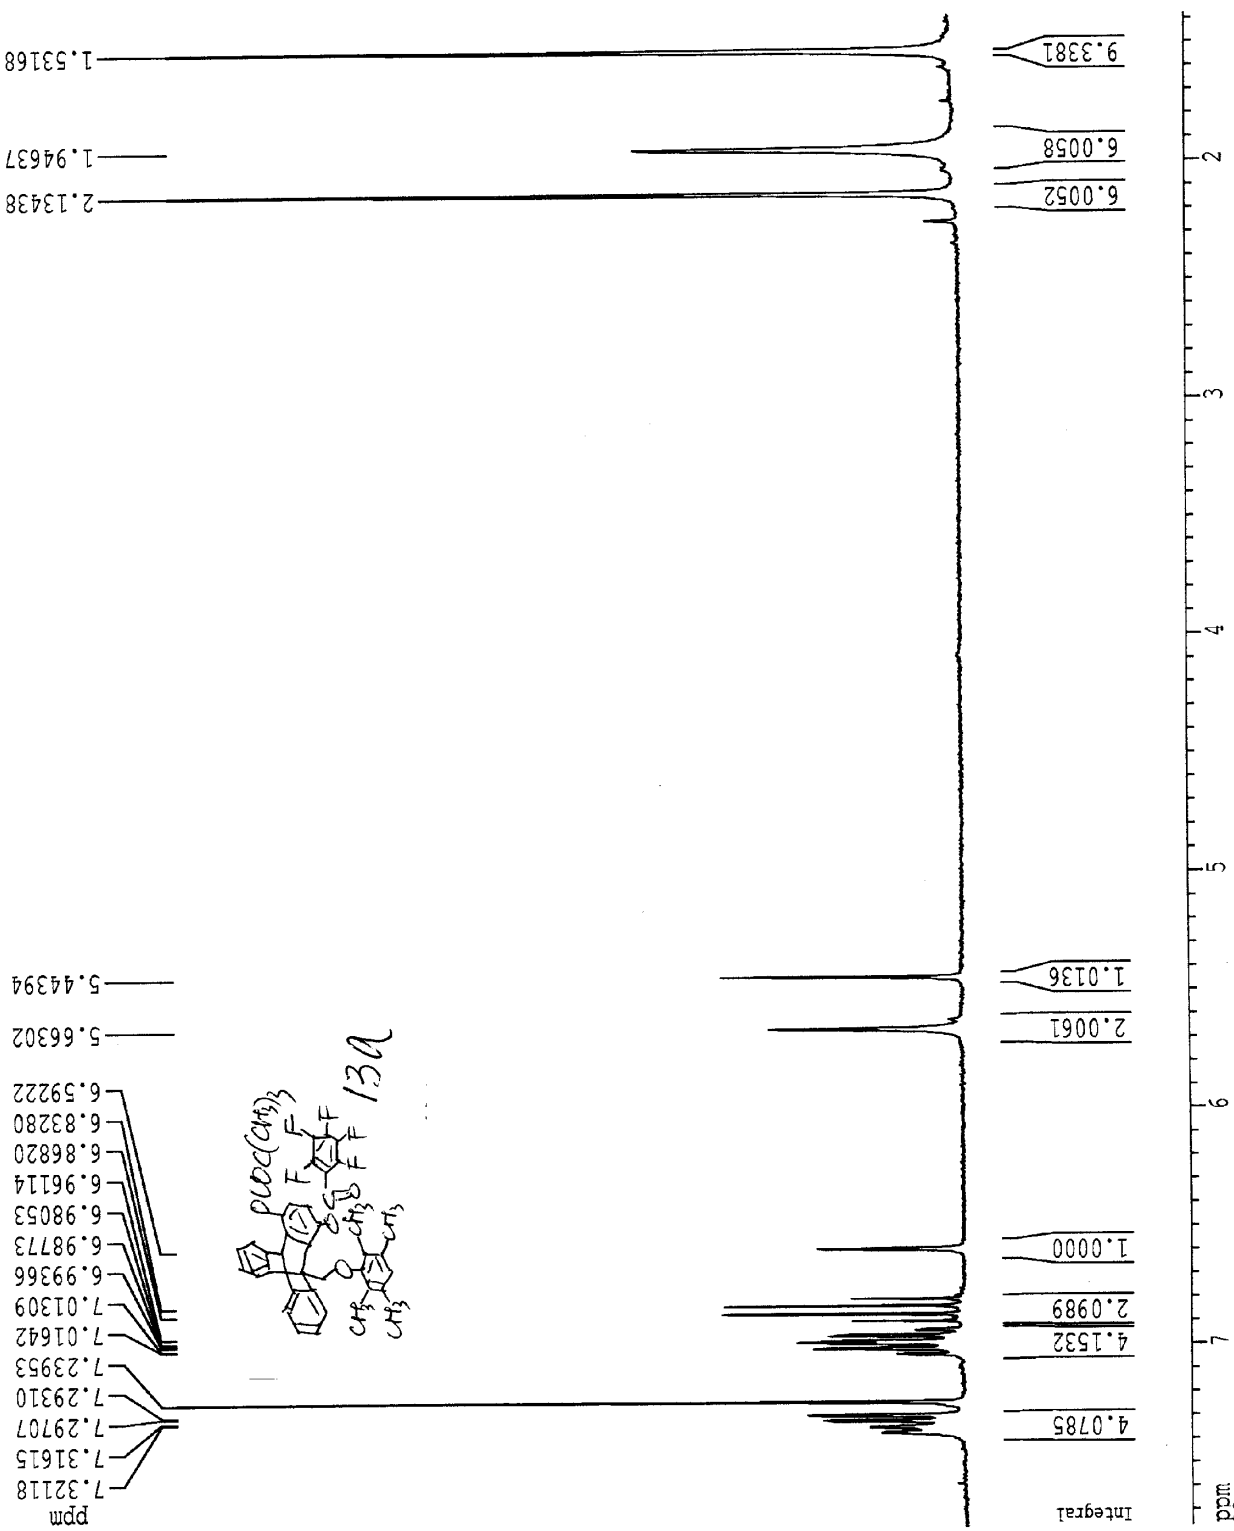

Current Data Parameters  
 NAME dimeotrip5f2  
 EXPNO 1  
 PROCNO 1

F2 - Acquisition Parameters  
 Date\_ 20060103  
 Time 15.37  
 INSTRUM spect  
 PROBHD 5 mm Multinu  
 PULPROG zg30  
 TD 32768  
 SOLVENT DMSO  
 NS 16  
 DS 2  
 SWH 6188.119 Hz  
 FIDRES 0.188846 Hz  
 AQ 2.6477044 sec  
 RG 724.1  
 DW 80.800 usec  
 DE 6.00 usec  
 TE 300.0 K  
 D1 1.00000000 sec  
 P1 14.10 usec  
 SFO1 300.1318534 MHz  
 NUC1 1H  
 PL1 3.00 dB

F2 - Processing parameters  
 SI 16384  
 SF 300.1300121 MHz  
 WDW EM  
 SSB 0  
 LB 0.30 Hz  
 GB 0  
 PC 1.00

1D NMR plot parameters  
 CX 20.00 cm  
 F1P 9.021 ppm  
 F1 2707.58 Hz  
 F2P 0.029 ppm  
 F2 8.74 Hz  
 PPMCM 0.44961 ppm/cm  
 HZCM 134.94189 Hz/cm

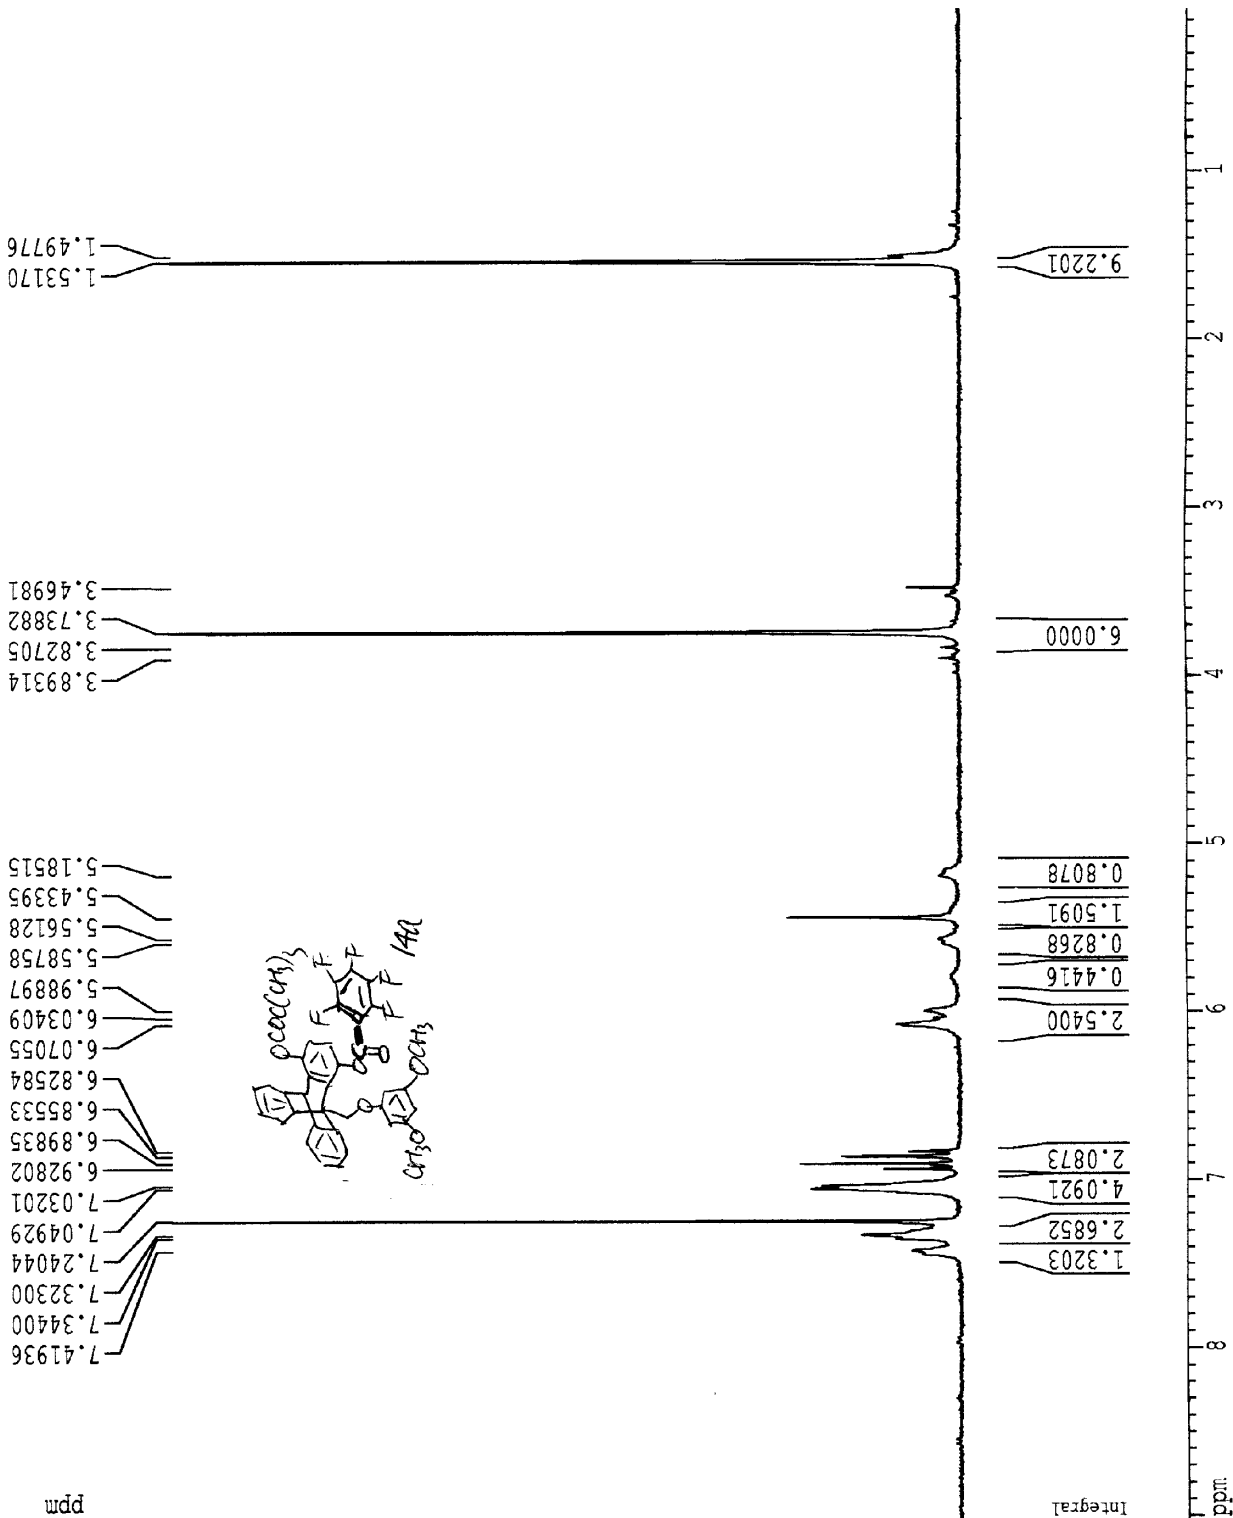

Supplement: NIHMS62004-supplement-si20061212_025.pdf [file NIHMS62004-supplement-si20061212_025.pdf]
